# Supplementary material for: Development and validation of COEWS (COVID-19 Early Warning Score) for hospitalized COVID-19 with laboratory features: A multicontinental retrospective study
Source: eLife. 2023 Aug 24;12:e85618. doi: 10.7554/eLife.85618 (PMC10479961; doi:10.7554/eLife.85618)
Supplement: Supplementary file 1. [file elife-85618-supp1.xlsx]

## Sheet: ROC_curves
Training			Internal test			External validation
Sensitivity	Specificity		Sensitivity	Specificity		Sensitivity	Specificity
1	0		1	0		1	0
0.999322951929587	0		1	0.00048780487804878		1	0.000200481154771451
0.999322951929587	0.000165837479270315		1	0.000975609756097561		1	0.000400962309542903
0.998645903859174	0.000165837479270315		1	0.00146341463414634		1	0.000601443464314354
0.998645903859174	0.00033167495854063		1	0.00195121951219512		1	0.000801924619085806
0.998645903859174	0.000497512437810945		1	0.0024390243902439		1	0.00100240577385726
0.998645903859174	0.00066334991708126		1	0.00292682926829268		1	0.00120288692862871
0.998645903859174	0.000829187396351575		1	0.00341463414634146		1	0.00140336808340016
0.998645903859174	0.00099502487562189		1	0.00390243902439024		1	0.00160384923817161
0.998645903859174	0.00116086235489221		1	0.00439024390243902		1	0.00180433039294306
0.998645903859174	0.00132669983416252		1	0.0048780487804878		1	0.00200481154771451
0.998645903859174	0.00149253731343284		1	0.00536585365853659		1	0.00220529270248597
0.998645903859174	0.00165837479270315		1	0.00585365853658537		1	0.00240577385725742
0.998645903859174	0.00182421227197347		1	0.00634146341463415		1	0.00260625501202887
0.998645903859174	0.00199004975124378		1	0.00682926829268293		1	0.00280673616680032
0.998645903859174	0.0021558872305141		1	0.00731707317073171		1	0.00300721732157177
0.998645903859174	0.00232172470978441		1	0.00780487804878049		0.998896247240618	0.00300721732157177
0.998645903859174	0.00248756218905473		1	0.00829268292682927		0.998896247240618	0.00320769847634322
0.998645903859174	0.00265339966832504		1	0.00878048780487805		0.998896247240618	0.00340817963111468
0.998645903859174	0.00281923714759536		1	0.00926829268292683		0.998896247240618	0.00360866078588613
0.998645903859174	0.00298507462686567		1	0.00975609756097561		0.998896247240618	0.00380914194065758
0.998645903859174	0.00315091210613599		1	0.0102439024390244		0.998896247240618	0.00400962309542903
0.998645903859174	0.0033167495854063		1	0.0107317073170732		0.998896247240618	0.00421010425020048
0.998645903859174	0.00348258706467662		1	0.011219512195122		0.998896247240618	0.00441058540497193
0.998645903859174	0.00364842454394693		1	0.0117073170731707		0.998896247240618	0.00461106655974338
0.998645903859174	0.00381426202321725		1	0.0121951219512195		0.998896247240618	0.00481154771451484
0.997968855788761	0.00381426202321725		1	0.0126829268292683		0.998896247240618	0.00501202886928629
0.997968855788761	0.00398009950248756		1	0.0131707317073171		0.998896247240618	0.00521251002405774
0.997968855788761	0.00414593698175788		1	0.0136585365853659		0.998896247240618	0.00541299117882919
0.997968855788761	0.00431177446102819		1	0.0141463414634146		0.998896247240618	0.00561347233360064
0.997291807718348	0.00431177446102819		1	0.0146341463414634		0.998896247240618	0.00581395348837209
0.997291807718348	0.00447761194029851		0.997787610619469	0.0146341463414634		0.998896247240618	0.00601443464314354
0.997291807718348	0.00464344941956882		0.997787610619469	0.0151219512195122		0.998896247240618	0.006214915797915
0.997291807718348	0.00480928689883914		0.997787610619469	0.015609756097561		0.998896247240618	0.00641539695268645
0.997291807718348	0.00497512437810945		0.997787610619469	0.0160975609756098		0.998896247240618	0.0066158781074579
0.996614759647935	0.00497512437810945		0.997787610619469	0.0165853658536585		0.998896247240618	0.00681635926222935
0.996614759647935	0.00514096185737977		0.997787610619469	0.0170731707317073		0.998896247240618	0.0070168404170008
0.996614759647935	0.00530679933665008		0.997787610619469	0.0175609756097561		0.998896247240618	0.00721732157177225
0.996614759647935	0.0054726368159204		0.997787610619469	0.0180487804878049		0.998896247240618	0.0074178027265437
0.996614759647935	0.00563847429519071		0.997787610619469	0.0185365853658537		0.998896247240618	0.00761828388131516
0.996614759647935	0.00580431177446103		0.997787610619469	0.0190243902439024		0.998896247240618	0.00781876503608661
0.996614759647935	0.00597014925373134		0.997787610619469	0.0195121951219512		0.998896247240618	0.00801924619085806
0.996614759647935	0.00613598673300166		0.997787610619469	0.02		0.998896247240618	0.00821972734562951
0.996614759647935	0.00630182421227197		0.997787610619469	0.0204878048780488		0.998896247240618	0.00842020850040096
0.996614759647935	0.00646766169154229		0.997787610619469	0.0209756097560976		0.998896247240618	0.00862068965517241
0.996614759647935	0.0066334991708126		0.997787610619469	0.0214634146341463		0.998896247240618	0.00882117080994387
0.996614759647935	0.00679933665008292		0.997787610619469	0.0219512195121951		0.998896247240618	0.00902165196471532
0.996614759647935	0.00696517412935323		0.997787610619469	0.0224390243902439		0.998896247240618	0.00922213311948677
0.996614759647935	0.00713101160862355		0.997787610619469	0.0229268292682927		0.998896247240618	0.00942261427425822
0.996614759647935	0.00729684908789386		0.997787610619469	0.0234146341463415		0.998896247240618	0.00962309542902967
0.995937711577522	0.00729684908789386		0.997787610619469	0.0239024390243902		0.998896247240618	0.00982357658380112
0.995937711577522	0.00746268656716418		0.997787610619469	0.024390243902439		0.998896247240618	0.0100240577385726
0.995937711577522	0.00762852404643449		0.997787610619469	0.0248780487804878		0.998896247240618	0.010224538893344
0.995937711577522	0.00779436152570481		0.997787610619469	0.0253658536585366		0.998896247240618	0.0104250200481155
0.995937711577522	0.00796019900497512		0.995575221238938	0.0253658536585366		0.998896247240618	0.0106255012028869
0.995937711577522	0.00812603648424544		0.995575221238938	0.0258536585365854		0.998896247240618	0.0108259823576584
0.995937711577522	0.00829187396351575		0.995575221238938	0.0263414634146341		0.998896247240618	0.0110264635124298
0.995937711577522	0.00845771144278607		0.995575221238938	0.0268292682926829		0.998896247240618	0.0112269446672013
0.995937711577522	0.00862354892205638		0.995575221238938	0.0273170731707317		0.998896247240618	0.0114274258219727
0.995260663507109	0.00862354892205638		0.995575221238938	0.0278048780487805		0.997792494481236	0.0114274258219727
0.995260663507109	0.0087893864013267		0.995575221238938	0.0282926829268293		0.997792494481236	0.0116279069767442
0.995260663507109	0.00895522388059702		0.995575221238938	0.0287804878048781		0.997792494481236	0.0118283881315156
0.995260663507109	0.00912106135986733		0.995575221238938	0.0292682926829268		0.997792494481236	0.0120288692862871
0.995260663507109	0.00928689883913764		0.995575221238938	0.0297560975609756		0.997792494481236	0.0122293504410585
0.995260663507109	0.00945273631840796		0.995575221238938	0.0302439024390244		0.997792494481236	0.01242983159583
0.995260663507109	0.00961857379767828		0.995575221238938	0.0307317073170732		0.997792494481236	0.0126303127506014
0.995260663507109	0.00978441127694859		0.995575221238938	0.031219512195122		0.997792494481236	0.0128307939053729
0.995260663507109	0.00995024875621891		0.995575221238938	0.0317073170731707		0.997792494481236	0.0130312750601443
0.995260663507109	0.0101160862354892		0.995575221238938	0.0321951219512195		0.997792494481236	0.0132317562149158
0.995260663507109	0.0102819237147595		0.995575221238938	0.0326829268292683		0.997792494481236	0.0134322373696872
0.995260663507109	0.0104477611940299		0.995575221238938	0.0331707317073171		0.997792494481236	0.0136327185244587
0.995260663507109	0.0106135986733002		0.995575221238938	0.0336585365853659		0.997792494481236	0.0138331996792302
0.994583615436696	0.0106135986733002		0.995575221238938	0.0341463414634146		0.997792494481236	0.0140336808340016
0.994583615436696	0.0107794361525705		0.995575221238938	0.0346341463414634		0.997792494481236	0.0142341619887731
0.994583615436696	0.0109452736318408		0.995575221238938	0.0351219512195122		0.997792494481236	0.0144346431435445
0.994583615436696	0.0111111111111111		0.995575221238938	0.035609756097561		0.997792494481236	0.014635124298316
0.994583615436696	0.0112769485903814		0.995575221238938	0.0360975609756098		0.997792494481236	0.0148356054530874
0.994583615436696	0.0114427860696517		0.993362831858407	0.0360975609756098		0.997792494481236	0.0150360866078589
0.994583615436696	0.0116086235489221		0.993362831858407	0.0365853658536585		0.997792494481236	0.0152365677626303
0.994583615436696	0.0117744610281924		0.993362831858407	0.0370731707317073		0.997792494481236	0.0154370489174018
0.994583615436696	0.0119402985074627		0.993362831858407	0.0375609756097561		0.997792494481236	0.0156375300721732
0.994583615436696	0.012106135986733		0.993362831858407	0.0380487804878049		0.997792494481236	0.0158380112269447
0.994583615436696	0.0122719734660033		0.993362831858407	0.0385365853658537		0.997792494481236	0.0160384923817161
0.994583615436696	0.0124378109452736		0.993362831858407	0.0390243902439024		0.997792494481236	0.0162389735364876
0.994583615436696	0.0126036484245439		0.993362831858407	0.0395121951219512		0.997792494481236	0.016439454691259
0.994583615436696	0.0127694859038143		0.993362831858407	0.04		0.997792494481236	0.0166399358460305
0.994583615436696	0.0129353233830846		0.991150442477876	0.04		0.997792494481236	0.0168404170008019
0.994583615436696	0.0131011608623549		0.991150442477876	0.0404878048780488		0.997792494481236	0.0170408981555734
0.994583615436696	0.0132669983416252		0.991150442477876	0.0409756097560976		0.997792494481236	0.0172413793103448
0.994583615436696	0.0134328358208955		0.991150442477876	0.0414634146341463		0.997792494481236	0.0174418604651163
0.994583615436696	0.0135986733001658		0.991150442477876	0.0419512195121951		0.997792494481236	0.0176423416198877
0.994583615436696	0.0137645107794362		0.991150442477876	0.0424390243902439		0.997792494481236	0.0178428227746592
0.994583615436696	0.0139303482587065		0.991150442477876	0.0429268292682927		0.997792494481236	0.0180433039294306
0.994583615436696	0.0140961857379768		0.991150442477876	0.0434146341463415		0.997792494481236	0.0182437850842021
0.993906567366283	0.0140961857379768		0.991150442477876	0.0439024390243902		0.997792494481236	0.0184442662389735
0.993906567366283	0.0142620232172471		0.991150442477876	0.044390243902439		0.997792494481236	0.018644747393745
0.993906567366283	0.0144278606965174		0.991150442477876	0.0448780487804878		0.997792494481236	0.0188452285485164
0.993906567366283	0.0145936981757877		0.991150442477876	0.0453658536585366		0.997792494481236	0.0190457097032879
0.993906567366283	0.014759535655058		0.991150442477876	0.0458536585365854		0.997792494481236	0.0192461908580593
0.993906567366283	0.0149253731343284		0.991150442477876	0.0463414634146341		0.997792494481236	0.0194466720128308
0.993906567366283	0.0150912106135987		0.991150442477876	0.0468292682926829		0.997792494481236	0.0196471531676022
0.993906567366283	0.015257048092869		0.991150442477876	0.0473170731707317		0.997792494481236	0.0198476343223737
0.993906567366283	0.0154228855721393		0.991150442477876	0.0478048780487805		0.997792494481236	0.0200481154771451
0.993906567366283	0.0155887230514096		0.991150442477876	0.0482926829268293		0.997792494481236	0.0202485966319166
0.993906567366283	0.0157545605306799		0.991150442477876	0.0487804878048781		0.997792494481236	0.0204490777866881
0.993906567366283	0.0159203980099502		0.991150442477876	0.0492682926829268		0.997792494481236	0.0206495589414595
0.993906567366283	0.0160862354892206		0.991150442477876	0.0497560975609756		0.997792494481236	0.020850040096231
0.993906567366283	0.0162520729684909		0.991150442477876	0.0502439024390244		0.997792494481236	0.0210505212510024
0.993906567366283	0.0164179104477612		0.991150442477876	0.0507317073170732		0.997792494481236	0.0212510024057739
0.993906567366283	0.0165837479270315		0.988938053097345	0.0507317073170732		0.997792494481236	0.0214514835605453
0.993906567366283	0.0167495854063018		0.988938053097345	0.0512195121951219		0.997792494481236	0.0216519647153168
0.993906567366283	0.0169154228855721		0.988938053097345	0.0517073170731707		0.997792494481236	0.0218524458700882
0.993906567366283	0.0170812603648425		0.988938053097345	0.0521951219512195		0.997792494481236	0.0220529270248597
0.993906567366283	0.0172470978441128		0.988938053097345	0.0526829268292683		0.997792494481236	0.0222534081796311
0.993906567366283	0.0174129353233831		0.988938053097345	0.0531707317073171		0.996688741721854	0.0222534081796311
0.993906567366283	0.0175787728026534		0.988938053097345	0.0536585365853659		0.996688741721854	0.0224538893344026
0.993906567366283	0.0177446102819237		0.988938053097345	0.0541463414634146		0.996688741721854	0.022654370489174
0.993906567366283	0.017910447761194		0.988938053097345	0.0546341463414634		0.996688741721854	0.0228548516439455
0.993906567366283	0.0180762852404643		0.988938053097345	0.0551219512195122		0.996688741721854	0.0230553327987169
0.993906567366283	0.0182421227197347		0.988938053097345	0.055609756097561		0.996688741721854	0.0232558139534884
0.993906567366283	0.018407960199005		0.988938053097345	0.0560975609756098		0.996688741721854	0.0234562951082598
0.993906567366283	0.0185737976782753		0.988938053097345	0.0565853658536585		0.996688741721854	0.0236567762630313
0.993906567366283	0.0187396351575456		0.986725663716814	0.0565853658536585		0.995584988962472	0.0236567762630313
0.993906567366283	0.0189054726368159		0.986725663716814	0.0570731707317073		0.995584988962472	0.0238572574178027
0.993906567366283	0.0190713101160862		0.986725663716814	0.0575609756097561		0.995584988962472	0.0240577385725742
0.993906567366283	0.0192371475953566		0.986725663716814	0.0580487804878049		0.995584988962472	0.0242582197273456
0.993906567366283	0.0194029850746269		0.986725663716814	0.0585365853658537		0.995584988962472	0.0244587008821171
0.993906567366283	0.0195688225538972		0.984513274336283	0.0585365853658537		0.995584988962472	0.0246591820368885
0.993906567366283	0.0197346600331675		0.984513274336283	0.0590243902439024		0.995584988962472	0.02485966319166
0.993906567366283	0.0199004975124378		0.984513274336283	0.0595121951219512		0.995584988962472	0.0250601443464314
0.993906567366283	0.0200663349917081		0.984513274336283	0.06		0.995584988962472	0.0252606255012029
0.993906567366283	0.0202321724709784		0.984513274336283	0.0604878048780488		0.99448123620309	0.0252606255012029
0.993906567366283	0.0203980099502488		0.984513274336283	0.0609756097560976		0.99448123620309	0.0254611066559743
0.993906567366283	0.0205638474295191		0.984513274336283	0.0614634146341463		0.99448123620309	0.0256615878107458
0.993906567366283	0.0207296849087894		0.984513274336283	0.0619512195121951		0.99448123620309	0.0258620689655172
0.993906567366283	0.0208955223880597		0.984513274336283	0.0624390243902439		0.99448123620309	0.0260625501202887
0.99322951929587	0.0208955223880597		0.984513274336283	0.0629268292682927		0.99448123620309	0.0262630312750601
0.99322951929587	0.02106135986733		0.984513274336283	0.0634146341463415		0.99448123620309	0.0264635124298316
0.99322951929587	0.0212271973466003		0.984513274336283	0.0639024390243902		0.99448123620309	0.026663993584603
0.99322951929587	0.0213930348258706		0.984513274336283	0.064390243902439		0.99448123620309	0.0268644747393745
0.99322951929587	0.021558872305141		0.984513274336283	0.0648780487804878		0.99448123620309	0.0270649558941459
0.99322951929587	0.0217247097844113		0.984513274336283	0.0653658536585366		0.99448123620309	0.0272654370489174
0.99322951929587	0.0218905472636816		0.984513274336283	0.0658536585365854		0.99448123620309	0.0274659182036889
0.992552471225457	0.0218905472636816		0.984513274336283	0.0663414634146341		0.99448123620309	0.0276663993584603
0.992552471225457	0.0220563847429519		0.984513274336283	0.0668292682926829		0.99448123620309	0.0278668805132318
0.992552471225457	0.0222222222222222		0.984513274336283	0.0673170731707317		0.99448123620309	0.0280673616680032
0.992552471225457	0.0223880597014925		0.984513274336283	0.0678048780487805		0.99448123620309	0.0282678428227747
0.992552471225457	0.0225538971807629		0.984513274336283	0.0682926829268293		0.99448123620309	0.0284683239775461
0.992552471225457	0.0227197346600332		0.984513274336283	0.0687804878048781		0.99448123620309	0.0286688051323176
0.992552471225457	0.0228855721393035		0.984513274336283	0.0692682926829268		0.99448123620309	0.028869286287089
0.992552471225457	0.0230514096185738		0.984513274336283	0.0697560975609756		0.99448123620309	0.0290697674418605
0.992552471225457	0.0232172470978441		0.984513274336283	0.0702439024390244		0.99448123620309	0.0292702485966319
0.992552471225457	0.0233830845771144		0.984513274336283	0.0707317073170732		0.99448123620309	0.0294707297514034
0.992552471225457	0.0235489220563847		0.982300884955752	0.0707317073170732		0.99448123620309	0.0296712109061748
0.992552471225457	0.0237147595356551		0.982300884955752	0.0712195121951219		0.99448123620309	0.0298716920609463
0.992552471225457	0.0238805970149254		0.982300884955752	0.0717073170731707		0.99448123620309	0.0300721732157177
0.992552471225457	0.0240464344941957		0.982300884955752	0.0721951219512195		0.99448123620309	0.0302726543704892
0.992552471225457	0.024212271973466		0.982300884955752	0.0726829268292683		0.99448123620309	0.0304731355252606
0.992552471225457	0.0243781094527363		0.982300884955752	0.0731707317073171		0.99448123620309	0.0306736166800321
0.992552471225457	0.0245439469320066		0.982300884955752	0.0736585365853658		0.99448123620309	0.0308740978348035
0.992552471225457	0.0247097844112769		0.982300884955752	0.0741463414634146		0.993377483443709	0.0308740978348035
0.992552471225457	0.0248756218905473		0.982300884955752	0.0746341463414634		0.993377483443709	0.031074578989575
0.992552471225457	0.0250414593698176		0.982300884955752	0.0751219512195122		0.993377483443709	0.0312750601443464
0.992552471225457	0.0252072968490879		0.982300884955752	0.075609756097561		0.993377483443709	0.0314755412991179
0.992552471225457	0.0253731343283582		0.982300884955752	0.0760975609756098		0.993377483443709	0.0316760224538893
0.992552471225457	0.0255389718076285		0.982300884955752	0.0765853658536585		0.993377483443709	0.0318765036086608
0.992552471225457	0.0257048092868988		0.982300884955752	0.0770731707317073		0.993377483443709	0.0320769847634322
0.992552471225457	0.0258706467661692		0.982300884955752	0.0775609756097561		0.993377483443709	0.0322774659182037
0.992552471225457	0.0260364842454395		0.982300884955752	0.0780487804878049		0.993377483443709	0.0324779470729751
0.992552471225457	0.0262023217247098		0.980088495575221	0.0780487804878049		0.993377483443709	0.0326784282277466
0.992552471225457	0.0263681592039801		0.980088495575221	0.0785365853658537		0.993377483443709	0.032878909382518
0.992552471225457	0.0265339966832504		0.980088495575221	0.0790243902439024		0.993377483443709	0.0330793905372895
0.992552471225457	0.0266998341625207		0.980088495575221	0.0795121951219512		0.993377483443709	0.0332798716920609
0.992552471225457	0.026865671641791		0.980088495575221	0.08		0.993377483443709	0.0334803528468324
0.992552471225457	0.0270315091210614		0.980088495575221	0.0804878048780488		0.993377483443709	0.0336808340016038
0.992552471225457	0.0271973466003317		0.980088495575221	0.0809756097560976		0.993377483443709	0.0338813151563753
0.992552471225457	0.027363184079602		0.97787610619469	0.0809756097560976		0.993377483443709	0.0340817963111468
0.992552471225457	0.0275290215588723		0.97787610619469	0.0814634146341463		0.993377483443709	0.0342822774659182
0.992552471225457	0.0276948590381426		0.975663716814159	0.0814634146341463		0.993377483443709	0.0344827586206897
0.992552471225457	0.0278606965174129		0.975663716814159	0.0819512195121951		0.993377483443709	0.0346832397754611
0.992552471225457	0.0280265339966832		0.975663716814159	0.0824390243902439		0.993377483443709	0.0348837209302326
0.992552471225457	0.0281923714759536		0.975663716814159	0.0829268292682927		0.993377483443709	0.035084202085004
0.992552471225457	0.0283582089552239		0.975663716814159	0.0834146341463415		0.993377483443709	0.0352846832397755
0.992552471225457	0.0285240464344942		0.975663716814159	0.0839024390243902		0.993377483443709	0.0354851643945469
0.992552471225457	0.0286898839137645		0.975663716814159	0.084390243902439		0.993377483443709	0.0356856455493184
0.992552471225457	0.0288557213930348		0.975663716814159	0.0848780487804878		0.993377483443709	0.0358861267040898
0.992552471225457	0.0290215588723051		0.975663716814159	0.0853658536585366		0.993377483443709	0.0360866078588613
0.992552471225457	0.0291873963515755		0.975663716814159	0.0858536585365854		0.993377483443709	0.0362870890136327
0.992552471225457	0.0293532338308458		0.975663716814159	0.0863414634146341		0.993377483443709	0.0364875701684042
0.992552471225457	0.0295190713101161		0.975663716814159	0.0868292682926829		0.993377483443709	0.0366880513231756
0.992552471225457	0.0296849087893864		0.975663716814159	0.0873170731707317		0.993377483443709	0.0368885324779471
0.992552471225457	0.0298507462686567		0.975663716814159	0.0878048780487805		0.993377483443709	0.0370890136327185
0.992552471225457	0.030016583747927		0.975663716814159	0.0882926829268293		0.993377483443709	0.03728949478749
0.992552471225457	0.0301824212271973		0.975663716814159	0.088780487804878		0.993377483443709	0.0374899759422614
0.992552471225457	0.0303482587064677		0.973451327433628	0.088780487804878		0.993377483443709	0.0376904570970329
0.992552471225457	0.030514096185738		0.973451327433628	0.0892682926829268		0.993377483443709	0.0378909382518043
0.992552471225457	0.0306799336650083		0.973451327433628	0.0897560975609756		0.993377483443709	0.0380914194065758
0.992552471225457	0.0308457711442786		0.973451327433628	0.0902439024390244		0.992273730684327	0.0380914194065758
0.992552471225457	0.0310116086235489		0.973451327433628	0.0907317073170732		0.992273730684327	0.0382919005613472
0.992552471225457	0.0311774461028192		0.973451327433628	0.0912195121951219		0.992273730684327	0.0384923817161187
0.992552471225457	0.0313432835820895		0.973451327433628	0.0917073170731707		0.992273730684327	0.0386928628708901
0.992552471225457	0.0315091210613599		0.973451327433628	0.0921951219512195		0.992273730684327	0.0388933440256616
0.992552471225457	0.0316749585406302		0.973451327433628	0.0926829268292683		0.992273730684327	0.039093825180433
0.992552471225457	0.0318407960199005		0.973451327433628	0.0931707317073171		0.992273730684327	0.0392943063352045
0.992552471225457	0.0320066334991708		0.973451327433628	0.0936585365853659		0.992273730684327	0.0394947874899759
0.992552471225457	0.0321724709784411		0.973451327433628	0.0941463414634146		0.992273730684327	0.0396952686447474
0.992552471225457	0.0323383084577114		0.973451327433628	0.0946341463414634		0.991169977924945	0.0396952686447474
0.992552471225457	0.0325041459369818		0.973451327433628	0.0951219512195122		0.991169977924945	0.0398957497995188
0.992552471225457	0.0326699834162521		0.973451327433628	0.095609756097561		0.991169977924945	0.0400962309542903
0.992552471225457	0.0328358208955224		0.973451327433628	0.0960975609756098		0.991169977924945	0.0402967121090618
0.992552471225457	0.0330016583747927		0.973451327433628	0.0965853658536585		0.990066225165563	0.0402967121090618
0.992552471225457	0.033167495854063		0.973451327433628	0.0970731707317073		0.988962472406181	0.0402967121090618
0.992552471225457	0.0333333333333333		0.971238938053097	0.0970731707317073		0.988962472406181	0.0404971932638332
0.992552471225457	0.0334991708126036		0.971238938053097	0.0975609756097561		0.988962472406181	0.0406976744186047
0.992552471225457	0.033665008291874		0.971238938053097	0.0980487804878049		0.987858719646799	0.0406976744186047
0.992552471225457	0.0338308457711443		0.971238938053097	0.0985365853658537		0.987858719646799	0.0408981555733761
0.992552471225457	0.0339966832504146		0.971238938053097	0.0990243902439024		0.987858719646799	0.0410986367281476
0.992552471225457	0.0341625207296849		0.971238938053097	0.0995121951219512		0.987858719646799	0.041299117882919
0.992552471225457	0.0343283582089552		0.971238938053097	0.1		0.987858719646799	0.0414995990376905
0.992552471225457	0.0344941956882255		0.971238938053097	0.100487804878049		0.987858719646799	0.0417000801924619
0.992552471225457	0.0346600331674959		0.971238938053097	0.100975609756098		0.987858719646799	0.0419005613472334
0.992552471225457	0.0348258706467662		0.971238938053097	0.101463414634146		0.987858719646799	0.0421010425020048
0.992552471225457	0.0349917081260365		0.971238938053097	0.101951219512195		0.987858719646799	0.0423015236567763
0.992552471225457	0.0351575456053068		0.971238938053097	0.102439024390244		0.987858719646799	0.0425020048115477
0.992552471225457	0.0353233830845771		0.971238938053097	0.102926829268293		0.987858719646799	0.0427024859663192
0.992552471225457	0.0354892205638474		0.971238938053097	0.103414634146341		0.987858719646799	0.0429029671210906
0.992552471225457	0.0356550580431177		0.971238938053097	0.10390243902439		0.987858719646799	0.0431034482758621
0.992552471225457	0.0358208955223881		0.969026548672566	0.10390243902439		0.987858719646799	0.0433039294306335
0.992552471225457	0.0359867330016584		0.969026548672566	0.104390243902439		0.987858719646799	0.043504410585405
0.992552471225457	0.0361525704809287		0.969026548672566	0.104878048780488		0.987858719646799	0.0437048917401764
0.992552471225457	0.036318407960199		0.969026548672566	0.105365853658537		0.987858719646799	0.0439053728949479
0.992552471225457	0.0364842454394693		0.969026548672566	0.105853658536585		0.987858719646799	0.0441058540497193
0.992552471225457	0.0366500829187396		0.969026548672566	0.106341463414634		0.987858719646799	0.0443063352044908
0.992552471225457	0.03681592039801		0.969026548672566	0.106829268292683		0.987858719646799	0.0445068163592622
0.992552471225457	0.0369817578772803		0.966814159292035	0.106829268292683		0.987858719646799	0.0447072975140337
0.992552471225457	0.0371475953565506		0.966814159292035	0.107317073170732		0.987858719646799	0.0449077786688051
0.992552471225457	0.0373134328358209		0.966814159292035	0.10780487804878		0.987858719646799	0.0451082598235766
0.992552471225457	0.0374792703150912		0.966814159292035	0.108292682926829		0.987858719646799	0.045308740978348
0.992552471225457	0.0376451077943615		0.966814159292035	0.108780487804878		0.987858719646799	0.0455092221331195
0.992552471225457	0.0378109452736318		0.966814159292035	0.109268292682927		0.987858719646799	0.0457097032878909
0.992552471225457	0.0379767827529022		0.964601769911504	0.109268292682927		0.987858719646799	0.0459101844426624
0.992552471225457	0.0381426202321725		0.964601769911504	0.109756097560976		0.987858719646799	0.0461106655974338
0.992552471225457	0.0383084577114428		0.964601769911504	0.110243902439024		0.987858719646799	0.0463111467522053
0.992552471225457	0.0384742951907131		0.964601769911504	0.110731707317073		0.987858719646799	0.0465116279069767
0.992552471225457	0.0386401326699834		0.964601769911504	0.111219512195122		0.987858719646799	0.0467121090617482
0.992552471225457	0.0388059701492537		0.964601769911504	0.111707317073171		0.987858719646799	0.0469125902165196
0.992552471225457	0.038971807628524		0.964601769911504	0.11219512195122		0.986754966887417	0.0469125902165196
0.992552471225457	0.0391376451077944		0.964601769911504	0.112682926829268		0.986754966887417	0.0471130713712911
0.992552471225457	0.0393034825870647		0.964601769911504	0.113170731707317		0.986754966887417	0.0473135525260625
0.992552471225457	0.039469320066335		0.964601769911504	0.113658536585366		0.986754966887417	0.047514033680834
0.992552471225457	0.0396351575456053		0.964601769911504	0.114146341463415		0.986754966887417	0.0477145148356055
0.992552471225457	0.0398009950248756		0.964601769911504	0.114634146341463		0.986754966887417	0.0479149959903769
0.992552471225457	0.0399668325041459		0.964601769911504	0.115121951219512		0.986754966887417	0.0481154771451484
0.992552471225457	0.0401326699834163		0.964601769911504	0.115609756097561		0.986754966887417	0.0483159582999198
0.991875423155044	0.0401326699834163		0.964601769911504	0.11609756097561		0.986754966887417	0.0485164394546913
0.991875423155044	0.0402985074626866		0.964601769911504	0.116585365853659		0.986754966887417	0.0487169206094627
0.991875423155044	0.0404643449419569		0.964601769911504	0.117073170731707		0.986754966887417	0.0489174017642342
0.991875423155044	0.0406301824212272		0.962389380530973	0.117073170731707		0.986754966887417	0.0491178829190056
0.991875423155044	0.0407960199004975		0.962389380530973	0.117560975609756		0.986754966887417	0.0493183640737771
0.991875423155044	0.0409618573797678		0.962389380530973	0.118048780487805		0.986754966887417	0.0495188452285485
0.991875423155044	0.0411276948590381		0.962389380530973	0.118536585365854		0.986754966887417	0.04971932638332
0.991875423155044	0.0412935323383085		0.962389380530973	0.119024390243902		0.986754966887417	0.0499198075380914
0.991875423155044	0.0414593698175788		0.962389380530973	0.119512195121951		0.986754966887417	0.0501202886928629
0.991875423155044	0.0416252072968491		0.962389380530973	0.12		0.986754966887417	0.0503207698476343
0.991875423155044	0.0417910447761194		0.962389380530973	0.120487804878049		0.986754966887417	0.0505212510024058
0.991875423155044	0.0419568822553897		0.960176991150443	0.120487804878049		0.986754966887417	0.0507217321571772
0.991875423155044	0.04212271973466		0.960176991150443	0.120975609756098		0.986754966887417	0.0509222133119487
0.991875423155044	0.0422885572139304		0.960176991150443	0.121463414634146		0.985651214128035	0.0509222133119487
0.991875423155044	0.0424543946932007		0.960176991150443	0.121951219512195		0.985651214128035	0.0511226944667201
0.991875423155044	0.042620232172471		0.960176991150443	0.122439024390244		0.985651214128035	0.0513231756214916
0.991198375084631	0.042620232172471		0.960176991150443	0.122926829268293		0.985651214128035	0.051523656776263
0.991198375084631	0.0427860696517413		0.960176991150443	0.123414634146341		0.985651214128035	0.0517241379310345
0.991198375084631	0.0429519071310116		0.960176991150443	0.12390243902439		0.985651214128035	0.0519246190858059
0.991198375084631	0.0431177446102819		0.960176991150443	0.124390243902439		0.985651214128035	0.0521251002405774
0.991198375084631	0.0432835820895522		0.960176991150443	0.124878048780488		0.985651214128035	0.0523255813953488
0.991198375084631	0.0434494195688226		0.960176991150443	0.125365853658537		0.985651214128035	0.0525260625501203
0.991198375084631	0.0436152570480929		0.960176991150443	0.125853658536585		0.985651214128035	0.0527265437048917
0.991198375084631	0.0437810945273632		0.957964601769911	0.125853658536585		0.985651214128035	0.0529270248596632
0.991198375084631	0.0439469320066335		0.957964601769911	0.126341463414634		0.985651214128035	0.0531275060144346
0.991198375084631	0.0441127694859038		0.957964601769911	0.126829268292683		0.985651214128035	0.0533279871692061
0.991198375084631	0.0442786069651741		0.957964601769911	0.127317073170732		0.985651214128035	0.0535284683239775
0.991198375084631	0.0444444444444444		0.957964601769911	0.12780487804878		0.985651214128035	0.053728949478749
0.991198375084631	0.0446102819237148		0.957964601769911	0.128292682926829		0.985651214128035	0.0539294306335205
0.991198375084631	0.0447761194029851		0.957964601769911	0.128780487804878		0.985651214128035	0.0541299117882919
0.991198375084631	0.0449419568822554		0.957964601769911	0.129268292682927		0.984547461368653	0.0541299117882919
0.991198375084631	0.0451077943615257		0.957964601769911	0.129756097560976		0.984547461368653	0.0543303929430634
0.991198375084631	0.045273631840796		0.957964601769911	0.130243902439024		0.984547461368653	0.0545308740978348
0.991198375084631	0.0454394693200663		0.957964601769911	0.130731707317073		0.984547461368653	0.0547313552526063
0.991198375084631	0.0456053067993367		0.955752212389381	0.130731707317073		0.984547461368653	0.0549318364073777
0.991198375084631	0.045771144278607		0.955752212389381	0.131219512195122		0.984547461368653	0.0551323175621492
0.991198375084631	0.0459369817578773		0.955752212389381	0.131707317073171		0.984547461368653	0.0553327987169206
0.991198375084631	0.0461028192371476		0.955752212389381	0.13219512195122		0.984547461368653	0.0555332798716921
0.990521327014218	0.0461028192371476		0.955752212389381	0.132682926829268		0.984547461368653	0.0557337610264635
0.990521327014218	0.0462686567164179		0.955752212389381	0.133170731707317		0.984547461368653	0.055934242181235
0.990521327014218	0.0464344941956882		0.955752212389381	0.133658536585366		0.984547461368653	0.0561347233360064
0.990521327014218	0.0466003316749585		0.955752212389381	0.134146341463415		0.984547461368653	0.0563352044907779
0.990521327014218	0.0467661691542289		0.955752212389381	0.134634146341463		0.984547461368653	0.0565356856455493
0.990521327014218	0.0469320066334992		0.955752212389381	0.135121951219512		0.984547461368653	0.0567361668003208
0.990521327014218	0.0470978441127695		0.955752212389381	0.135609756097561		0.984547461368653	0.0569366479550922
0.990521327014218	0.0472636815920398		0.955752212389381	0.13609756097561		0.984547461368653	0.0571371291098637
0.990521327014218	0.0474295190713101		0.955752212389381	0.136585365853659		0.984547461368653	0.0573376102646351
0.990521327014218	0.0475953565505804		0.95353982300885	0.136585365853659		0.984547461368653	0.0575380914194066
0.990521327014218	0.0477611940298507		0.95353982300885	0.137073170731707		0.984547461368653	0.057738572574178
0.990521327014218	0.0479270315091211		0.95353982300885	0.137560975609756		0.984547461368653	0.0579390537289495
0.990521327014218	0.0480928689883914		0.95353982300885	0.138048780487805		0.984547461368653	0.0581395348837209
0.990521327014218	0.0482587064676617		0.95353982300885	0.138536585365854		0.984547461368653	0.0583400160384924
0.990521327014218	0.048424543946932		0.95353982300885	0.139024390243902		0.984547461368653	0.0585404971932638
0.990521327014218	0.0485903814262023		0.95353982300885	0.139512195121951		0.984547461368653	0.0587409783480353
0.990521327014218	0.0487562189054726		0.95353982300885	0.14		0.984547461368653	0.0589414595028067
0.990521327014218	0.048922056384743		0.95353982300885	0.140487804878049		0.984547461368653	0.0591419406575782
0.990521327014218	0.0490878938640133		0.95353982300885	0.140975609756098		0.984547461368653	0.0593424218123496
0.990521327014218	0.0492537313432836		0.95353982300885	0.141463414634146		0.984547461368653	0.0595429029671211
0.990521327014218	0.0494195688225539		0.95353982300885	0.141951219512195		0.984547461368653	0.0597433841218925
0.990521327014218	0.0495854063018242		0.95353982300885	0.142439024390244		0.984547461368653	0.059943865276664
0.990521327014218	0.0497512437810945		0.95353982300885	0.142926829268293		0.984547461368653	0.0601443464314354
0.990521327014218	0.0499170812603648		0.95353982300885	0.143414634146341		0.984547461368653	0.0603448275862069
0.990521327014218	0.0500829187396352		0.95353982300885	0.14390243902439		0.984547461368653	0.0605453087409783
0.990521327014218	0.0502487562189055		0.95353982300885	0.144390243902439		0.984547461368653	0.0607457898957498
0.990521327014218	0.0504145936981758		0.95353982300885	0.144878048780488		0.984547461368653	0.0609462710505213
0.990521327014218	0.0505804311774461		0.95353982300885	0.145365853658537		0.984547461368653	0.0611467522052927
0.990521327014218	0.0507462686567164		0.95353982300885	0.145853658536585		0.984547461368653	0.0613472333600642
0.990521327014218	0.0509121061359867		0.95353982300885	0.146341463414634		0.984547461368653	0.0615477145148356
0.990521327014218	0.051077943615257		0.95353982300885	0.146829268292683		0.984547461368653	0.0617481956696071
0.990521327014218	0.0512437810945274		0.95353982300885	0.147317073170732		0.984547461368653	0.0619486768243785
0.990521327014218	0.0514096185737977		0.95353982300885	0.14780487804878		0.984547461368653	0.06214915797915
0.990521327014218	0.051575456053068		0.95353982300885	0.148292682926829		0.984547461368653	0.0623496391339214
0.990521327014218	0.0517412935323383		0.95353982300885	0.148780487804878		0.984547461368653	0.0625501202886929
0.989844278943805	0.0517412935323383		0.951327433628319	0.148780487804878		0.984547461368653	0.0627506014434643
0.989844278943805	0.0519071310116086		0.951327433628319	0.149268292682927		0.984547461368653	0.0629510825982358
0.989844278943805	0.0520729684908789		0.951327433628319	0.149756097560976		0.984547461368653	0.0631515637530072
0.989844278943805	0.0522388059701493		0.951327433628319	0.150243902439024		0.984547461368653	0.0633520449077787
0.989844278943805	0.0524046434494196		0.951327433628319	0.150731707317073		0.984547461368653	0.0635525260625501
0.989167230873392	0.0524046434494196		0.951327433628319	0.151219512195122		0.984547461368653	0.0637530072173216
0.989167230873392	0.0525704809286899		0.951327433628319	0.151707317073171		0.984547461368653	0.063953488372093
0.989167230873392	0.0527363184079602		0.951327433628319	0.15219512195122		0.984547461368653	0.0641539695268645
0.989167230873392	0.0529021558872305		0.951327433628319	0.152682926829268		0.984547461368653	0.0643544506816359
0.989167230873392	0.0530679933665008		0.951327433628319	0.153170731707317		0.984547461368653	0.0645549318364074
0.989167230873392	0.0532338308457711		0.951327433628319	0.153658536585366		0.984547461368653	0.0647554129911788
0.989167230873392	0.0533996683250415		0.951327433628319	0.154146341463415		0.984547461368653	0.0649558941459503
0.989167230873392	0.0535655058043118		0.951327433628319	0.154634146341463		0.984547461368653	0.0651563753007217
0.989167230873392	0.0537313432835821		0.951327433628319	0.155121951219512		0.983443708609272	0.0651563753007217
0.989167230873392	0.0538971807628524		0.951327433628319	0.155609756097561		0.983443708609272	0.0653568564554932
0.989167230873392	0.0540630182421227		0.949115044247788	0.155609756097561		0.983443708609272	0.0655573376102646
0.989167230873392	0.054228855721393		0.949115044247788	0.15609756097561		0.983443708609272	0.0657578187650361
0.989167230873392	0.0543946932006633		0.949115044247788	0.156585365853659		0.983443708609272	0.0659582999198075
0.989167230873392	0.0545605306799337		0.949115044247788	0.157073170731707		0.983443708609272	0.066158781074579
0.989167230873392	0.054726368159204		0.949115044247788	0.157560975609756		0.983443708609272	0.0663592622293504
0.989167230873392	0.0548922056384743		0.949115044247788	0.158048780487805		0.983443708609272	0.0665597433841219
0.989167230873392	0.0550580431177446		0.949115044247788	0.158536585365854		0.983443708609272	0.0667602245388933
0.989167230873392	0.0552238805970149		0.949115044247788	0.159024390243902		0.983443708609272	0.0669607056936648
0.989167230873392	0.0553897180762852		0.949115044247788	0.159512195121951		0.983443708609272	0.0671611868484362
0.989167230873392	0.0555555555555556		0.949115044247788	0.16		0.983443708609272	0.0673616680032077
0.989167230873392	0.0557213930348259		0.946902654867257	0.16		0.983443708609272	0.0675621491579791
0.989167230873392	0.0558872305140962		0.946902654867257	0.160487804878049		0.983443708609272	0.0677626303127506
0.989167230873392	0.0560530679933665		0.946902654867257	0.160975609756098		0.983443708609272	0.0679631114675221
0.989167230873392	0.0562189054726368		0.946902654867257	0.161463414634146		0.98233995584989	0.0679631114675221
0.989167230873392	0.0563847429519071		0.946902654867257	0.161951219512195		0.98233995584989	0.0681635926222935
0.989167230873392	0.0565505804311774		0.946902654867257	0.162439024390244		0.98233995584989	0.068364073777065
0.989167230873392	0.0567164179104478		0.946902654867257	0.162926829268293		0.98233995584989	0.0685645549318364
0.989167230873392	0.0568822553897181		0.946902654867257	0.163414634146341		0.98233995584989	0.0687650360866079
0.989167230873392	0.0570480928689884		0.946902654867257	0.16390243902439		0.98233995584989	0.0689655172413793
0.989167230873392	0.0572139303482587		0.946902654867257	0.164390243902439		0.98233995584989	0.0691659983961508
0.989167230873392	0.057379767827529		0.946902654867257	0.164878048780488		0.98233995584989	0.0693664795509222
0.989167230873392	0.0575456053067993		0.946902654867257	0.165365853658537		0.98233995584989	0.0695669607056937
0.989167230873392	0.0577114427860696		0.946902654867257	0.165853658536585		0.98233995584989	0.0697674418604651
0.989167230873392	0.05787728026534		0.946902654867257	0.166341463414634		0.98233995584989	0.0699679230152366
0.989167230873392	0.0580431177446103		0.946902654867257	0.166829268292683		0.98233995584989	0.070168404170008
0.989167230873392	0.0582089552238806		0.944690265486726	0.166829268292683		0.98233995584989	0.0703688853247795
0.989167230873392	0.0583747927031509		0.944690265486726	0.167317073170732		0.981236203090508	0.0703688853247795
0.989167230873392	0.0585406301824212		0.944690265486726	0.16780487804878		0.981236203090508	0.0705693664795509
0.989167230873392	0.0587064676616915		0.944690265486726	0.168292682926829		0.981236203090508	0.0707698476343224
0.989167230873392	0.0588723051409619		0.944690265486726	0.168780487804878		0.980132450331126	0.0707698476343224
0.989167230873392	0.0590381426202322		0.944690265486726	0.169268292682927		0.980132450331126	0.0709703287890938
0.989167230873392	0.0592039800995025		0.944690265486726	0.169756097560976		0.980132450331126	0.0711708099438653
0.989167230873392	0.0593698175787728		0.944690265486726	0.170243902439024		0.980132450331126	0.0713712910986367
0.989167230873392	0.0595356550580431		0.942477876106195	0.170243902439024		0.980132450331126	0.0715717722534082
0.989167230873392	0.0597014925373134		0.942477876106195	0.170731707317073		0.980132450331126	0.0717722534081796
0.989167230873392	0.0598673300165837		0.942477876106195	0.171219512195122		0.980132450331126	0.0719727345629511
0.989167230873392	0.0600331674958541		0.942477876106195	0.171707317073171		0.980132450331126	0.0721732157177225
0.989167230873392	0.0601990049751244		0.942477876106195	0.172195121951219		0.980132450331126	0.072373696872494
0.989167230873392	0.0603648424543947		0.942477876106195	0.172682926829268		0.980132450331126	0.0725741780272654
0.989167230873392	0.060530679933665		0.942477876106195	0.173170731707317		0.980132450331126	0.0727746591820369
0.989167230873392	0.0606965174129353		0.940265486725664	0.173170731707317		0.980132450331126	0.0729751403368083
0.989167230873392	0.0608623548922056		0.940265486725664	0.173658536585366		0.980132450331126	0.0731756214915798
0.989167230873392	0.061028192371476		0.940265486725664	0.174146341463415		0.980132450331126	0.0733761026463512
0.989167230873392	0.0611940298507463		0.938053097345133	0.174146341463415		0.980132450331126	0.0735765838011227
0.989167230873392	0.0613598673300166		0.938053097345133	0.174634146341463		0.980132450331126	0.0737770649558941
0.989167230873392	0.0615257048092869		0.938053097345133	0.175121951219512		0.980132450331126	0.0739775461106656
0.989167230873392	0.0616915422885572		0.938053097345133	0.175609756097561		0.980132450331126	0.0741780272654371
0.989167230873392	0.0618573797678275		0.935840707964602	0.175609756097561		0.980132450331126	0.0743785084202085
0.988490182802979	0.0618573797678275		0.935840707964602	0.17609756097561		0.980132450331126	0.07457898957498
0.988490182802979	0.0620232172470978		0.935840707964602	0.176585365853659		0.980132450331126	0.0747794707297514
0.987813134732566	0.0620232172470978		0.933628318584071	0.176585365853659		0.980132450331126	0.0749799518845229
0.987813134732566	0.0621890547263682		0.933628318584071	0.177073170731707		0.980132450331126	0.0751804330392943
0.987813134732566	0.0623548922056385		0.933628318584071	0.177560975609756		0.980132450331126	0.0753809141940658
0.987813134732566	0.0625207296849088		0.933628318584071	0.178048780487805		0.980132450331126	0.0755813953488372
0.987813134732566	0.0626865671641791		0.933628318584071	0.178536585365854		0.980132450331126	0.0757818765036087
0.987813134732566	0.0628524046434494		0.933628318584071	0.179024390243902		0.980132450331126	0.0759823576583801
0.987813134732566	0.0630182421227197		0.933628318584071	0.179512195121951		0.980132450331126	0.0761828388131516
0.987813134732566	0.06318407960199		0.933628318584071	0.18		0.980132450331126	0.076383319967923
0.987813134732566	0.0633499170812604		0.933628318584071	0.180487804878049		0.980132450331126	0.0765838011226945
0.987813134732566	0.0635157545605307		0.933628318584071	0.180975609756098		0.980132450331126	0.0767842822774659
0.987813134732566	0.063681592039801		0.933628318584071	0.181463414634146		0.980132450331126	0.0769847634322374
0.987813134732566	0.0638474295190713		0.933628318584071	0.181951219512195		0.980132450331126	0.0771852445870088
0.987813134732566	0.0640132669983416		0.933628318584071	0.182439024390244		0.980132450331126	0.0773857257417803
0.987813134732566	0.0641791044776119		0.933628318584071	0.182926829268293		0.979028697571744	0.0773857257417803
0.987813134732566	0.0643449419568823		0.933628318584071	0.183414634146341		0.979028697571744	0.0775862068965517
0.987813134732566	0.0645107794361526		0.933628318584071	0.18390243902439		0.979028697571744	0.0777866880513232
0.987136086662153	0.0645107794361526		0.933628318584071	0.184390243902439		0.979028697571744	0.0779871692060946
0.987136086662153	0.0646766169154229		0.933628318584071	0.184878048780488		0.979028697571744	0.0781876503608661
0.987136086662153	0.0648424543946932		0.933628318584071	0.185365853658537		0.979028697571744	0.0783881315156375
0.987136086662153	0.0650082918739635		0.933628318584071	0.185853658536585		0.979028697571744	0.078588612670409
0.987136086662153	0.0651741293532338		0.933628318584071	0.186341463414634		0.979028697571744	0.0787890938251804
0.987136086662153	0.0653399668325041		0.933628318584071	0.186829268292683		0.979028697571744	0.0789895749799519
0.987136086662153	0.0655058043117745		0.933628318584071	0.187317073170732		0.979028697571744	0.0791900561347233
0.987136086662153	0.0656716417910448		0.933628318584071	0.18780487804878		0.979028697571744	0.0793905372894948
0.987136086662153	0.0658374792703151		0.933628318584071	0.188292682926829		0.979028697571744	0.0795910184442662
0.987136086662153	0.0660033167495854		0.933628318584071	0.188780487804878		0.979028697571744	0.0797914995990377
0.987136086662153	0.0661691542288557		0.933628318584071	0.189268292682927		0.979028697571744	0.0799919807538091
0.987136086662153	0.066334991708126		0.933628318584071	0.189756097560976		0.979028697571744	0.0801924619085806
0.987136086662153	0.0665008291873963		0.933628318584071	0.190243902439024		0.979028697571744	0.080392943063352
0.98645903859174	0.0665008291873963		0.93141592920354	0.193658536585366		0.979028697571744	0.0805934242181235
0.98645903859174	0.0666666666666667		0.93141592920354	0.194146341463415		0.979028697571744	0.080793905372895
0.98645903859174	0.066832504145937		0.93141592920354	0.194634146341463		0.979028697571744	0.0809943865276664
0.98645903859174	0.0669983416252073		0.93141592920354	0.195121951219512		0.979028697571744	0.0811948676824378
0.98645903859174	0.0671641791044776		0.93141592920354	0.195609756097561		0.979028697571744	0.0813953488372093
0.98645903859174	0.0673300165837479		0.93141592920354	0.19609756097561		0.979028697571744	0.0815958299919808
0.98645903859174	0.0674958540630182		0.93141592920354	0.196585365853659		0.979028697571744	0.0817963111467522
0.98645903859174	0.0676616915422886		0.93141592920354	0.197073170731707		0.979028697571744	0.0819967923015237
0.98645903859174	0.0678275290215589		0.93141592920354	0.197560975609756		0.979028697571744	0.0821972734562951
0.98645903859174	0.0679933665008292		0.93141592920354	0.198048780487805		0.979028697571744	0.0823977546110666
0.98645903859174	0.0681592039800995		0.93141592920354	0.198536585365854		0.979028697571744	0.082598235765838
0.98645903859174	0.0683250414593698		0.93141592920354	0.199024390243902		0.979028697571744	0.0827987169206095
0.98645903859174	0.0684908789386401		0.93141592920354	0.199512195121951		0.979028697571744	0.0829991980753809
0.98645903859174	0.0686567164179104		0.93141592920354	0.2		0.979028697571744	0.0831996792301524
0.98645903859174	0.0688225538971808		0.93141592920354	0.200487804878049		0.979028697571744	0.0834001603849238
0.98645903859174	0.0689883913764511		0.93141592920354	0.200975609756098		0.979028697571744	0.0836006415396953
0.98645903859174	0.0691542288557214		0.93141592920354	0.201463414634146		0.979028697571744	0.0838011226944667
0.98645903859174	0.0693200663349917		0.93141592920354	0.201951219512195		0.979028697571744	0.0840016038492382
0.98645903859174	0.069485903814262		0.93141592920354	0.202439024390244		0.979028697571744	0.0842020850040096
0.98645903859174	0.0696517412935323		0.93141592920354	0.202926829268293		0.979028697571744	0.0844025661587811
0.98645903859174	0.0698175787728027		0.93141592920354	0.203414634146341		0.979028697571744	0.0846030473135525
0.98645903859174	0.069983416252073		0.93141592920354	0.20390243902439		0.979028697571744	0.084803528468324
0.98645903859174	0.0701492537313433		0.93141592920354	0.204390243902439		0.979028697571744	0.0850040096230954
0.98645903859174	0.0703150912106136		0.929203539823009	0.204390243902439		0.979028697571744	0.0852044907778669
0.98645903859174	0.0704809286898839		0.929203539823009	0.204878048780488		0.979028697571744	0.0854049719326383
0.98645903859174	0.0706467661691542		0.929203539823009	0.205365853658537		0.979028697571744	0.0856054530874098
0.98645903859174	0.0708126036484245		0.929203539823009	0.205853658536585		0.979028697571744	0.0858059342421812
0.98645903859174	0.0709784411276949		0.929203539823009	0.206341463414634		0.979028697571744	0.0860064153969527
0.985781990521327	0.0709784411276949		0.926991150442478	0.206341463414634		0.979028697571744	0.0862068965517241
0.985781990521327	0.0711442786069652		0.926991150442478	0.206829268292683		0.979028697571744	0.0864073777064956
0.985781990521327	0.0713101160862355		0.926991150442478	0.207317073170732		0.979028697571744	0.086607858861267
0.985781990521327	0.0714759535655058		0.926991150442478	0.20780487804878		0.979028697571744	0.0868083400160385
0.985781990521327	0.0716417910447761		0.926991150442478	0.208292682926829		0.979028697571744	0.0870088211708099
0.985781990521327	0.0718076285240464		0.926991150442478	0.208780487804878		0.979028697571744	0.0872093023255814
0.985781990521327	0.0719734660033167		0.924778761061947	0.208780487804878		0.979028697571744	0.0874097834803528
0.985781990521327	0.0721393034825871		0.924778761061947	0.209268292682927		0.979028697571744	0.0876102646351243
0.985781990521327	0.0723051409618574		0.924778761061947	0.209756097560976		0.979028697571744	0.0878107457898958
0.985781990521327	0.0724709784411277		0.924778761061947	0.210243902439024		0.979028697571744	0.0880112269446672
0.985781990521327	0.072636815920398		0.924778761061947	0.210731707317073		0.979028697571744	0.0882117080994387
0.985781990521327	0.0728026533996683		0.924778761061947	0.211219512195122		0.979028697571744	0.0884121892542101
0.985781990521327	0.0729684908789386		0.924778761061947	0.211707317073171		0.979028697571744	0.0886126704089816
0.985781990521327	0.073134328358209		0.924778761061947	0.21219512195122		0.979028697571744	0.088813151563753
0.985781990521327	0.0733001658374793		0.924778761061947	0.212682926829268		0.979028697571744	0.0890136327185245
0.985781990521327	0.0734660033167496		0.924778761061947	0.213170731707317		0.979028697571744	0.0892141138732959
0.985781990521327	0.0736318407960199		0.924778761061947	0.213658536585366		0.979028697571744	0.0894145950280674
0.985781990521327	0.0737976782752902		0.924778761061947	0.214146341463415		0.979028697571744	0.0896150761828388
0.985781990521327	0.0739635157545605		0.924778761061947	0.214634146341463		0.979028697571744	0.0898155573376103
0.985781990521327	0.0741293532338309		0.924778761061947	0.215121951219512		0.979028697571744	0.0900160384923817
0.985781990521327	0.0742951907131012		0.924778761061947	0.215609756097561		0.979028697571744	0.0902165196471532
0.985781990521327	0.0744610281923715		0.924778761061947	0.21609756097561		0.979028697571744	0.0904170008019246
0.985781990521327	0.0746268656716418		0.924778761061947	0.216585365853659		0.979028697571744	0.0906174819566961
0.985781990521327	0.0747927031509121		0.924778761061947	0.217073170731707		0.979028697571744	0.0908179631114675
0.985781990521327	0.0749585406301824		0.924778761061947	0.217560975609756		0.977924944812362	0.0908179631114675
0.985781990521327	0.0751243781094527		0.924778761061947	0.218048780487805		0.977924944812362	0.091018444266239
0.985781990521327	0.0752902155887231		0.924778761061947	0.218536585365854		0.977924944812362	0.0912189254210104
0.985781990521327	0.0754560530679934		0.924778761061947	0.219024390243902		0.977924944812362	0.0914194065757819
0.985781990521327	0.0756218905472637		0.924778761061947	0.219512195121951		0.977924944812362	0.0916198877305533
0.985781990521327	0.075787728026534		0.924778761061947	0.22		0.977924944812362	0.0918203688853248
0.985781990521327	0.0759535655058043		0.924778761061947	0.220487804878049		0.977924944812362	0.0920208500400962
0.985781990521327	0.0761194029850746		0.924778761061947	0.220975609756098		0.977924944812362	0.0922213311948677
0.985781990521327	0.0762852404643449		0.924778761061947	0.221463414634146		0.977924944812362	0.0924218123496391
0.985781990521327	0.0764510779436153		0.924778761061947	0.221951219512195		0.97682119205298	0.0924218123496391
0.985781990521327	0.0766169154228856		0.924778761061947	0.222439024390244		0.97682119205298	0.0926222935044106
0.985104942450914	0.0766169154228856		0.924778761061947	0.222926829268293		0.97682119205298	0.092822774659182
0.985104942450914	0.0767827529021559		0.924778761061947	0.223414634146341		0.97682119205298	0.0930232558139535
0.985104942450914	0.0769485903814262		0.924778761061947	0.22390243902439		0.97682119205298	0.0932237369687249
0.985104942450914	0.0771144278606965		0.924778761061947	0.224390243902439		0.97682119205298	0.0934242181234964
0.985104942450914	0.0772802653399668		0.924778761061947	0.224878048780488		0.97682119205298	0.0936246992782678
0.985104942450914	0.0774461028192372		0.924778761061947	0.225365853658537		0.97682119205298	0.0938251804330393
0.985104942450914	0.0776119402985075		0.924778761061947	0.225853658536585		0.97682119205298	0.0940256615878107
0.985104942450914	0.0777777777777778		0.924778761061947	0.226341463414634		0.97682119205298	0.0942261427425822
0.985104942450914	0.0779436152570481		0.924778761061947	0.226829268292683		0.97682119205298	0.0944266238973537
0.985104942450914	0.0781094527363184		0.924778761061947	0.227317073170732		0.97682119205298	0.0946271050521251
0.985104942450914	0.0782752902155887		0.922566371681416	0.227317073170732		0.97682119205298	0.0948275862068965
0.985104942450914	0.078441127694859		0.922566371681416	0.22780487804878		0.97682119205298	0.095028067361668
0.985104942450914	0.0786069651741294		0.922566371681416	0.228292682926829		0.97682119205298	0.0952285485164395
0.984427894380501	0.0786069651741294		0.922566371681416	0.228780487804878		0.97682119205298	0.0954290296712109
0.984427894380501	0.0787728026533997		0.922566371681416	0.229268292682927		0.97682119205298	0.0956295108259824
0.983750846310088	0.0787728026533997		0.922566371681416	0.229756097560976		0.97682119205298	0.0958299919807538
0.983750846310088	0.07893864013267		0.922566371681416	0.230243902439024		0.97682119205298	0.0960304731355253
0.983750846310088	0.0791044776119403		0.922566371681416	0.230731707317073		0.97682119205298	0.0962309542902967
0.983750846310088	0.0792703150912106		0.922566371681416	0.231219512195122		0.97682119205298	0.0964314354450682
0.983750846310088	0.0794361525704809		0.922566371681416	0.231707317073171		0.97682119205298	0.0966319165998396
0.983750846310088	0.0796019900497512		0.922566371681416	0.23219512195122		0.975717439293598	0.0966319165998396
0.983750846310088	0.0797678275290216		0.922566371681416	0.232682926829268		0.975717439293598	0.0968323977546111
0.983750846310088	0.0799336650082919		0.922566371681416	0.233170731707317		0.975717439293598	0.0970328789093825
0.983750846310088	0.0800995024875622		0.922566371681416	0.233658536585366		0.975717439293598	0.097233360064154
0.983750846310088	0.0802653399668325		0.922566371681416	0.234146341463415		0.975717439293598	0.0974338412189254
0.983750846310088	0.0804311774461028		0.922566371681416	0.234634146341463		0.975717439293598	0.0976343223736969
0.983750846310088	0.0805970149253731		0.922566371681416	0.235121951219512		0.975717439293598	0.0978348035284683
0.983750846310088	0.0807628524046435		0.922566371681416	0.235609756097561		0.975717439293598	0.0980352846832398
0.983750846310088	0.0809286898839138		0.922566371681416	0.23609756097561		0.975717439293598	0.0982357658380112
0.983750846310088	0.0810945273631841		0.922566371681416	0.236585365853659		0.975717439293598	0.0984362469927827
0.983750846310088	0.0812603648424544		0.922566371681416	0.237073170731707		0.975717439293598	0.0986367281475541
0.983750846310088	0.0814262023217247		0.922566371681416	0.237560975609756		0.975717439293598	0.0988372093023256
0.983750846310088	0.081592039800995		0.922566371681416	0.238048780487805		0.975717439293598	0.099037690457097
0.983750846310088	0.0817578772802653		0.922566371681416	0.238536585365854		0.975717439293598	0.0992381716118685
0.983750846310088	0.0819237147595357		0.922566371681416	0.239024390243902		0.975717439293598	0.0994386527666399
0.983750846310088	0.082089552238806		0.920353982300885	0.239024390243902		0.975717439293598	0.0996391339214114
0.983750846310088	0.0822553897180763		0.920353982300885	0.239512195121951		0.975717439293598	0.0998396150761828
0.983750846310088	0.0824212271973466		0.920353982300885	0.24		0.975717439293598	0.100040096230954
0.983750846310088	0.0825870646766169		0.920353982300885	0.240487804878049		0.975717439293598	0.100240577385726
0.983750846310088	0.0827529021558872		0.920353982300885	0.240975609756098		0.975717439293598	0.100441058540497
0.983750846310088	0.0829187396351575		0.920353982300885	0.241463414634146		0.975717439293598	0.100641539695269
0.983750846310088	0.0830845771144279		0.920353982300885	0.241951219512195		0.975717439293598	0.10084202085004
0.983750846310088	0.0832504145936982		0.920353982300885	0.242439024390244		0.975717439293598	0.101042502004812
0.983750846310088	0.0834162520729685		0.920353982300885	0.242926829268293		0.975717439293598	0.101242983159583
0.983750846310088	0.0835820895522388		0.920353982300885	0.243414634146341		0.975717439293598	0.101443464314354
0.983750846310088	0.0837479270315091		0.920353982300885	0.24390243902439		0.975717439293598	0.101643945469126
0.983750846310088	0.0839137645107794		0.920353982300885	0.244390243902439		0.975717439293598	0.101844426623897
0.983750846310088	0.0840796019900498		0.920353982300885	0.244878048780488		0.975717439293598	0.102044907778669
0.983073798239675	0.0840796019900498		0.920353982300885	0.245365853658537		0.975717439293598	0.10224538893344
0.983073798239675	0.0842454394693201		0.920353982300885	0.245853658536585		0.975717439293598	0.102445870088212
0.983073798239675	0.0844112769485904		0.920353982300885	0.246341463414634		0.975717439293598	0.102646351242983
0.983073798239675	0.0845771144278607		0.920353982300885	0.246829268292683		0.975717439293598	0.102846832397755
0.983073798239675	0.084742951907131		0.918141592920354	0.246829268292683		0.975717439293598	0.103047313552526
0.983073798239675	0.0849087893864013		0.918141592920354	0.247317073170732		0.974613686534216	0.103047313552526
0.983073798239675	0.0850746268656716		0.918141592920354	0.24780487804878		0.974613686534216	0.103247794707298
0.983073798239675	0.085240464344942		0.918141592920354	0.248292682926829		0.974613686534216	0.103448275862069
0.982396750169262	0.085240464344942		0.918141592920354	0.248780487804878		0.974613686534216	0.10364875701684
0.982396750169262	0.0854063018242123		0.918141592920354	0.249268292682927		0.974613686534216	0.103849238171612
0.982396750169262	0.0855721393034826		0.918141592920354	0.249756097560976		0.974613686534216	0.104049719326383
0.982396750169262	0.0857379767827529		0.918141592920354	0.250243902439024		0.974613686534216	0.104250200481155
0.982396750169262	0.0859038142620232		0.918141592920354	0.250731707317073		0.974613686534216	0.104450681635926
0.982396750169262	0.0860696517412935		0.918141592920354	0.251219512195122		0.974613686534216	0.104651162790698
0.982396750169262	0.0862354892205638		0.918141592920354	0.251707317073171		0.974613686534216	0.104851643945469
0.982396750169262	0.0864013266998342		0.918141592920354	0.25219512195122		0.974613686534216	0.105052125100241
0.981719702098849	0.0864013266998342		0.915929203539823	0.255609756097561		0.974613686534216	0.105252606255012
0.981719702098849	0.0865671641791045		0.915929203539823	0.25609756097561		0.974613686534216	0.105453087409783
0.981719702098849	0.0867330016583748		0.915929203539823	0.256585365853659		0.974613686534216	0.105653568564555
0.981719702098849	0.0868988391376451		0.915929203539823	0.257073170731707		0.974613686534216	0.105854049719326
0.981719702098849	0.0870646766169154		0.915929203539823	0.257560975609756		0.974613686534216	0.106054530874098
0.981719702098849	0.0872305140961857		0.915929203539823	0.258048780487805		0.974613686534216	0.106255012028869
0.981719702098849	0.0873963515754561		0.915929203539823	0.258536585365854		0.974613686534216	0.106455493183641
0.981719702098849	0.0875621890547264		0.915929203539823	0.259024390243902		0.974613686534216	0.106655974338412
0.981719702098849	0.0877280265339967		0.915929203539823	0.259512195121951		0.974613686534216	0.106856455493184
0.981719702098849	0.087893864013267		0.915929203539823	0.26		0.974613686534216	0.107056936647955
0.981719702098849	0.0880597014925373		0.915929203539823	0.260487804878049		0.974613686534216	0.107257417802727
0.981719702098849	0.0882255389718076		0.915929203539823	0.260975609756098		0.974613686534216	0.107457898957498
0.981719702098849	0.0883913764510779		0.915929203539823	0.261463414634146		0.974613686534216	0.107658380112269
0.981719702098849	0.0885572139303483		0.915929203539823	0.261951219512195		0.974613686534216	0.107858861267041
0.981719702098849	0.0887230514096186		0.915929203539823	0.262439024390244		0.974613686534216	0.108059342421812
0.981719702098849	0.0888888888888889		0.915929203539823	0.262926829268293		0.974613686534216	0.108259823576584
0.981719702098849	0.0890547263681592		0.915929203539823	0.263414634146341		0.974613686534216	0.108460304731355
0.981719702098849	0.0892205638474295		0.913716814159292	0.263414634146341		0.974613686534216	0.108660785886127
0.981719702098849	0.0893864013266998		0.913716814159292	0.26390243902439		0.974613686534216	0.108861267040898
0.981719702098849	0.0895522388059701		0.913716814159292	0.264390243902439		0.974613686534216	0.10906174819567
0.981719702098849	0.0897180762852405		0.911504424778761	0.264390243902439		0.974613686534216	0.109262229350441
0.981719702098849	0.0898839137645108		0.911504424778761	0.264878048780488		0.974613686534216	0.109462710505213
0.981719702098849	0.0900497512437811		0.911504424778761	0.265365853658537		0.974613686534216	0.109663191659984
0.981719702098849	0.0902155887230514		0.911504424778761	0.266341463414634		0.974613686534216	0.109863672814755
0.981719702098849	0.0903814262023217		0.911504424778761	0.266829268292683		0.974613686534216	0.110064153969527
0.981719702098849	0.090547263681592		0.911504424778761	0.267317073170732		0.974613686534216	0.110264635124298
0.981719702098849	0.0907131011608624		0.911504424778761	0.267804878048781		0.974613686534216	0.11046511627907
0.981719702098849	0.0908789386401327		0.911504424778761	0.268292682926829		0.974613686534216	0.110665597433841
0.981719702098849	0.091044776119403		0.911504424778761	0.268780487804878		0.974613686534216	0.110866078588613
0.981719702098849	0.0912106135986733		0.911504424778761	0.269268292682927		0.974613686534216	0.111066559743384
0.981719702098849	0.0913764510779436		0.911504424778761	0.269756097560976		0.974613686534216	0.111267040898156
0.981719702098849	0.0915422885572139		0.911504424778761	0.270243902439024		0.974613686534216	0.111467522052927
0.981719702098849	0.0917081260364842		0.911504424778761	0.270731707317073		0.974613686534216	0.111668003207698
0.981719702098849	0.0918739635157546		0.911504424778761	0.271219512195122		0.974613686534216	0.11186848436247
0.981719702098849	0.0920398009950249		0.911504424778761	0.271707317073171		0.974613686534216	0.112068965517241
0.981719702098849	0.0922056384742952		0.911504424778761	0.27219512195122		0.974613686534216	0.112269446672013
0.981719702098849	0.0923714759535655		0.911504424778761	0.272682926829268		0.974613686534216	0.112469927826784
0.981719702098849	0.0925373134328358		0.90929203539823	0.272682926829268		0.974613686534216	0.112670408981556
0.981719702098849	0.0927031509121061		0.907079646017699	0.273170731707317		0.974613686534216	0.112870890136327
0.981719702098849	0.0928689883913764		0.907079646017699	0.273658536585366		0.974613686534216	0.113071371291099
0.981719702098849	0.0930348258706468		0.907079646017699	0.274146341463415		0.974613686534216	0.11327185244587
0.981719702098849	0.0932006633499171		0.907079646017699	0.274634146341463		0.974613686534216	0.113472333600642
0.981719702098849	0.0933665008291874		0.904867256637168	0.274634146341463		0.974613686534216	0.113672814755413
0.981719702098849	0.0935323383084577		0.904867256637168	0.275121951219512		0.974613686534216	0.113873295910184
0.981719702098849	0.093698175787728		0.904867256637168	0.275609756097561		0.973509933774834	0.113873295910184
0.981719702098849	0.0938640132669983		0.904867256637168	0.27609756097561		0.973509933774834	0.114073777064956
0.981719702098849	0.0940298507462687		0.904867256637168	0.276585365853659		0.973509933774834	0.114274258219727
0.981719702098849	0.094195688225539		0.904867256637168	0.277073170731707		0.973509933774834	0.114474739374499
0.981719702098849	0.0943615257048093		0.904867256637168	0.277560975609756		0.973509933774834	0.11467522052927
0.981719702098849	0.0945273631840796		0.904867256637168	0.278048780487805		0.973509933774834	0.114875701684042
0.981719702098849	0.0946932006633499		0.904867256637168	0.278536585365854		0.973509933774834	0.115076182838813
0.981719702098849	0.0948590381426202		0.904867256637168	0.279024390243902		0.973509933774834	0.115276663993585
0.981719702098849	0.0950248756218905		0.902654867256637	0.279024390243902		0.973509933774834	0.115477145148356
0.981719702098849	0.0951907131011609		0.902654867256637	0.279512195121951		0.973509933774834	0.115677626303128
0.981719702098849	0.0953565505804312		0.902654867256637	0.28		0.973509933774834	0.115878107457899
0.981719702098849	0.0955223880597015		0.902654867256637	0.280487804878049		0.973509933774834	0.11607858861267
0.981719702098849	0.0956882255389718		0.902654867256637	0.280975609756098		0.973509933774834	0.116279069767442
0.981719702098849	0.0958540630182421		0.902654867256637	0.281463414634146		0.973509933774834	0.116479550922213
0.981719702098849	0.0960199004975124		0.902654867256637	0.281951219512195		0.973509933774834	0.116680032076985
0.981719702098849	0.0961857379767828		0.902654867256637	0.282439024390244		0.973509933774834	0.116880513231756
0.981719702098849	0.0963515754560531		0.902654867256637	0.282926829268293		0.973509933774834	0.117080994386528
0.981719702098849	0.0965174129353234		0.902654867256637	0.283414634146341		0.973509933774834	0.117281475541299
0.981719702098849	0.0966832504145937		0.902654867256637	0.28390243902439		0.973509933774834	0.117481956696071
0.981719702098849	0.096849087893864		0.902654867256637	0.284390243902439		0.973509933774834	0.117682437850842
0.981042654028436	0.096849087893864		0.902654867256637	0.284878048780488		0.973509933774834	0.117882919005613
0.981042654028436	0.0970149253731343		0.902654867256637	0.285365853658537		0.973509933774834	0.118083400160385
0.981042654028436	0.0971807628524046		0.902654867256637	0.285853658536585		0.973509933774834	0.118283881315156
0.981042654028436	0.097346600331675		0.902654867256637	0.286341463414634		0.972406181015453	0.118283881315156
0.981042654028436	0.0975124378109453		0.900442477876106	0.286341463414634		0.972406181015453	0.118484362469928
0.981042654028436	0.0976782752902156		0.900442477876106	0.286829268292683		0.972406181015453	0.118684843624699
0.981042654028436	0.0978441127694859		0.898230088495575	0.286829268292683		0.972406181015453	0.118885324779471
0.981042654028436	0.0980099502487562		0.898230088495575	0.287317073170732		0.971302428256071	0.118885324779471
0.981042654028436	0.0981757877280265		0.898230088495575	0.28780487804878		0.971302428256071	0.119085805934242
0.981042654028436	0.0983416252072968		0.898230088495575	0.288292682926829		0.971302428256071	0.119286287089014
0.981042654028436	0.0985074626865672		0.896017699115044	0.288292682926829		0.971302428256071	0.119486768243785
0.981042654028436	0.0986733001658375		0.896017699115044	0.288780487804878		0.971302428256071	0.119687249398557
0.981042654028436	0.0988391376451078		0.896017699115044	0.289268292682927		0.971302428256071	0.119887730553328
0.981042654028436	0.0990049751243781		0.896017699115044	0.289756097560976		0.971302428256071	0.120088211708099
0.981042654028436	0.0991708126036484		0.896017699115044	0.290243902439024		0.971302428256071	0.120288692862871
0.981042654028436	0.0993366500829187		0.896017699115044	0.290731707317073		0.971302428256071	0.120489174017642
0.981042654028436	0.0995024875621891		0.896017699115044	0.291219512195122		0.971302428256071	0.120689655172414
0.981042654028436	0.0996683250414594		0.896017699115044	0.291707317073171		0.971302428256071	0.120890136327185
0.981042654028436	0.0998341625207297		0.896017699115044	0.292195121951219		0.971302428256071	0.121090617481957
0.981042654028436	0.1		0.896017699115044	0.292682926829268		0.971302428256071	0.121291098636728
0.981042654028436	0.10016583747927		0.896017699115044	0.293170731707317		0.971302428256071	0.1214915797915
0.981042654028436	0.100331674958541		0.896017699115044	0.293658536585366		0.970198675496689	0.1214915797915
0.981042654028436	0.100497512437811		0.896017699115044	0.294146341463415		0.970198675496689	0.121692060946271
0.981042654028436	0.100663349917081		0.896017699115044	0.294634146341463		0.970198675496689	0.121892542101043
0.981042654028436	0.100829187396352		0.896017699115044	0.295121951219512		0.970198675496689	0.122093023255814
0.981042654028436	0.100995024875622		0.896017699115044	0.295609756097561		0.970198675496689	0.122293504410585
0.981042654028436	0.101160862354892		0.896017699115044	0.29609756097561		0.970198675496689	0.122493985565357
0.981042654028436	0.101326699834163		0.896017699115044	0.296585365853659		0.970198675496689	0.122694466720128
0.981042654028436	0.101492537313433		0.896017699115044	0.297073170731707		0.970198675496689	0.1228949478749
0.980365605958023	0.101492537313433		0.896017699115044	0.297560975609756		0.970198675496689	0.123095429029671
0.980365605958023	0.101658374792703		0.896017699115044	0.298048780487805		0.970198675496689	0.123295910184443
0.980365605958023	0.101824212271973		0.896017699115044	0.298536585365854		0.970198675496689	0.123496391339214
0.980365605958023	0.101990049751244		0.896017699115044	0.299024390243902		0.970198675496689	0.123696872493986
0.980365605958023	0.102155887230514		0.896017699115044	0.299512195121951		0.970198675496689	0.123897353648757
0.97968855788761	0.102155887230514		0.896017699115044	0.3		0.970198675496689	0.124097834803528
0.97968855788761	0.102321724709784		0.896017699115044	0.300487804878049		0.970198675496689	0.1242983159583
0.97968855788761	0.102487562189055		0.896017699115044	0.300975609756098		0.970198675496689	0.124498797113071
0.97968855788761	0.102653399668325		0.896017699115044	0.301463414634146		0.970198675496689	0.124699278267843
0.97968855788761	0.102819237147595		0.893805309734513	0.301463414634146		0.970198675496689	0.124899759422614
0.97968855788761	0.102985074626866		0.893805309734513	0.301951219512195		0.970198675496689	0.125100240577386
0.97968855788761	0.103150912106136		0.893805309734513	0.302439024390244		0.970198675496689	0.125300721732157
0.97968855788761	0.103316749585406		0.893805309734513	0.302926829268293		0.970198675496689	0.125501202886929
0.97968855788761	0.103482587064677		0.893805309734513	0.303414634146341		0.970198675496689	0.1257016840417
0.97968855788761	0.103648424543947		0.893805309734513	0.30390243902439		0.970198675496689	0.125902165196472
0.97968855788761	0.103814262023217		0.893805309734513	0.304390243902439		0.970198675496689	0.126102646351243
0.97968855788761	0.103980099502488		0.891592920353982	0.304390243902439		0.970198675496689	0.126303127506014
0.97968855788761	0.104145936981758		0.891592920353982	0.304878048780488		0.970198675496689	0.126503608660786
0.97968855788761	0.104311774461028		0.891592920353982	0.305365853658537		0.970198675496689	0.126704089815557
0.97968855788761	0.104477611940299		0.891592920353982	0.305853658536585		0.970198675496689	0.126904570970329
0.97968855788761	0.104643449419569		0.891592920353982	0.306341463414634		0.970198675496689	0.1271050521251
0.97968855788761	0.104809286898839		0.891592920353982	0.306829268292683		0.970198675496689	0.127305533279872
0.97968855788761	0.104975124378109		0.891592920353982	0.307317073170732		0.970198675496689	0.127506014434643
0.97968855788761	0.10514096185738		0.891592920353982	0.30780487804878		0.970198675496689	0.127706495589415
0.97968855788761	0.10530679933665		0.891592920353982	0.308292682926829		0.969094922737307	0.127706495589415
0.97968855788761	0.10547263681592		0.889380530973451	0.308292682926829		0.969094922737307	0.127906976744186
0.97968855788761	0.105638474295191		0.889380530973451	0.308780487804878		0.969094922737307	0.128107457898957
0.97968855788761	0.105804311774461		0.889380530973451	0.309268292682927		0.969094922737307	0.128307939053729
0.97968855788761	0.105970149253731		0.889380530973451	0.309756097560976		0.969094922737307	0.1285084202085
0.97968855788761	0.106135986733002		0.889380530973451	0.310243902439024		0.969094922737307	0.128708901363272
0.97968855788761	0.106301824212272		0.889380530973451	0.310731707317073		0.969094922737307	0.128909382518043
0.97968855788761	0.106467661691542		0.889380530973451	0.311219512195122		0.969094922737307	0.129109863672815
0.97968855788761	0.106633499170813		0.889380530973451	0.311707317073171		0.969094922737307	0.129310344827586
0.97968855788761	0.106799336650083		0.889380530973451	0.31219512195122		0.969094922737307	0.129510825982358
0.97968855788761	0.106965174129353		0.889380530973451	0.312682926829268		0.969094922737307	0.129711307137129
0.97968855788761	0.107131011608624		0.88716814159292	0.312682926829268		0.969094922737307	0.129911788291901
0.97968855788761	0.107296849087894		0.88716814159292	0.313170731707317		0.969094922737307	0.130112269446672
0.97968855788761	0.107462686567164		0.88716814159292	0.318536585365854		0.969094922737307	0.130312750601443
0.97968855788761	0.107628524046434		0.88716814159292	0.319024390243902		0.969094922737307	0.130513231756215
0.97968855788761	0.107794361525705		0.88716814159292	0.319512195121951		0.969094922737307	0.130713712910986
0.97968855788761	0.107960199004975		0.88716814159292	0.32		0.969094922737307	0.130914194065758
0.97968855788761	0.108126036484245		0.884955752212389	0.32		0.969094922737307	0.131114675220529
0.97968855788761	0.108291873963516		0.884955752212389	0.320487804878049		0.969094922737307	0.131315156375301
0.97968855788761	0.108457711442786		0.884955752212389	0.320975609756098		0.969094922737307	0.131515637530072
0.97968855788761	0.108623548922056		0.884955752212389	0.321463414634146		0.969094922737307	0.131716118684844
0.97968855788761	0.108789386401327		0.884955752212389	0.321951219512195		0.969094922737307	0.131916599839615
0.97968855788761	0.108955223880597		0.884955752212389	0.322439024390244		0.969094922737307	0.132117080994387
0.97968855788761	0.109121061359867		0.884955752212389	0.322926829268293		0.969094922737307	0.132317562149158
0.97968855788761	0.109286898839138		0.884955752212389	0.323414634146341		0.969094922737307	0.132518043303929
0.97968855788761	0.109452736318408		0.882743362831858	0.323414634146341		0.969094922737307	0.132718524458701
0.97968855788761	0.109618573797678		0.882743362831858	0.32390243902439		0.969094922737307	0.132919005613472
0.97968855788761	0.109784411276949		0.882743362831858	0.324390243902439		0.969094922737307	0.133119486768244
0.97968855788761	0.109950248756219		0.882743362831858	0.324878048780488		0.969094922737307	0.133319967923015
0.97968855788761	0.110116086235489		0.882743362831858	0.325365853658537		0.967991169977925	0.133319967923015
0.979011509817197	0.110116086235489		0.882743362831858	0.325853658536585		0.967991169977925	0.133520449077787
0.979011509817197	0.11028192371476		0.882743362831858	0.326341463414634		0.967991169977925	0.133720930232558
0.979011509817197	0.11044776119403		0.882743362831858	0.326829268292683		0.966887417218543	0.133720930232558
0.979011509817197	0.1106135986733		0.882743362831858	0.327317073170732		0.966887417218543	0.13392141138733
0.979011509817197	0.11077943615257		0.882743362831858	0.327804878048781		0.966887417218543	0.134121892542101
0.979011509817197	0.110945273631841		0.882743362831858	0.328292682926829		0.966887417218543	0.134322373696872
0.979011509817197	0.111111111111111		0.882743362831858	0.328780487804878		0.966887417218543	0.134522854851644
0.979011509817197	0.111276948590381		0.882743362831858	0.329268292682927		0.966887417218543	0.134723336006415
0.979011509817197	0.111442786069652		0.882743362831858	0.329756097560976		0.966887417218543	0.134923817161187
0.979011509817197	0.111608623548922		0.882743362831858	0.330243902439024		0.966887417218543	0.135124298315958
0.979011509817197	0.111774461028192		0.882743362831858	0.330731707317073		0.966887417218543	0.13532477947073
0.979011509817197	0.111940298507463		0.882743362831858	0.332682926829268		0.965783664459161	0.13532477947073
0.979011509817197	0.112106135986733		0.882743362831858	0.333170731707317		0.965783664459161	0.135525260625501
0.979011509817197	0.112271973466003		0.882743362831858	0.333658536585366		0.965783664459161	0.135725741780273
0.979011509817197	0.112437810945274		0.880530973451327	0.333658536585366		0.965783664459161	0.135926222935044
0.979011509817197	0.112603648424544		0.880530973451327	0.334146341463415		0.965783664459161	0.136126704089816
0.979011509817197	0.112769485903814		0.880530973451327	0.334634146341463		0.965783664459161	0.136327185244587
0.979011509817197	0.112935323383085		0.880530973451327	0.335121951219512		0.965783664459161	0.136527666399358
0.978334461746784	0.112935323383085		0.880530973451327	0.335609756097561		0.965783664459161	0.13672814755413
0.978334461746784	0.113101160862355		0.880530973451327	0.33609756097561		0.965783664459161	0.136928628708901
0.978334461746784	0.113266998341625		0.880530973451327	0.336585365853659		0.965783664459161	0.137129109863673
0.978334461746784	0.113432835820896		0.880530973451327	0.337073170731707		0.965783664459161	0.137329591018444
0.978334461746784	0.113598673300166		0.880530973451327	0.337560975609756		0.965783664459161	0.137530072173216
0.978334461746784	0.113764510779436		0.880530973451327	0.338048780487805		0.965783664459161	0.137730553327987
0.978334461746784	0.113930348258706		0.880530973451327	0.338536585365854		0.965783664459161	0.137931034482759
0.978334461746784	0.114096185737977		0.878318584070796	0.338536585365854		0.965783664459161	0.13813151563753
0.978334461746784	0.114262023217247		0.878318584070796	0.339024390243902		0.965783664459161	0.138331996792302
0.978334461746784	0.114427860696517		0.878318584070796	0.339512195121951		0.965783664459161	0.138532477947073
0.978334461746784	0.114593698175788		0.878318584070796	0.34		0.965783664459161	0.138732959101844
0.978334461746784	0.114759535655058		0.878318584070796	0.340487804878049		0.965783664459161	0.138933440256616
0.978334461746784	0.114925373134328		0.878318584070796	0.340975609756098		0.965783664459161	0.139133921411387
0.978334461746784	0.115091210613599		0.878318584070796	0.341463414634146		0.965783664459161	0.139334402566159
0.978334461746784	0.115257048092869		0.878318584070796	0.341951219512195		0.965783664459161	0.13953488372093
0.978334461746784	0.115422885572139		0.878318584070796	0.342439024390244		0.965783664459161	0.139735364875702
0.978334461746784	0.11558872305141		0.878318584070796	0.342926829268293		0.965783664459161	0.139935846030473
0.978334461746784	0.11575456053068		0.878318584070796	0.343414634146341		0.965783664459161	0.140136327185245
0.978334461746784	0.11592039800995		0.878318584070796	0.34390243902439		0.965783664459161	0.140336808340016
0.978334461746784	0.116086235489221		0.878318584070796	0.344390243902439		0.965783664459161	0.140537289494787
0.978334461746784	0.116252072968491		0.878318584070796	0.344878048780488		0.965783664459161	0.140737770649559
0.978334461746784	0.116417910447761		0.878318584070796	0.345365853658537		0.965783664459161	0.14093825180433
0.978334461746784	0.116583747927032		0.878318584070796	0.345853658536585		0.965783664459161	0.141138732959102
0.978334461746784	0.116749585406302		0.876106194690266	0.345853658536585		0.965783664459161	0.141339214113873
0.978334461746784	0.116915422885572		0.876106194690266	0.346341463414634		0.965783664459161	0.141539695268645
0.978334461746784	0.117081260364842		0.876106194690266	0.346829268292683		0.965783664459161	0.141740176423416
0.978334461746784	0.117247097844113		0.873893805309734	0.346829268292683		0.965783664459161	0.141940657578188
0.978334461746784	0.117412935323383		0.873893805309734	0.347317073170732		0.965783664459161	0.142141138732959
0.978334461746784	0.117578772802653		0.873893805309734	0.34780487804878		0.965783664459161	0.142341619887731
0.978334461746784	0.117744610281924		0.873893805309734	0.348292682926829		0.965783664459161	0.142542101042502
0.978334461746784	0.117910447761194		0.873893805309734	0.348780487804878		0.964679911699779	0.142542101042502
0.978334461746784	0.118076285240464		0.873893805309734	0.349268292682927		0.964679911699779	0.142742582197273
0.978334461746784	0.118242122719735		0.873893805309734	0.349756097560976		0.963576158940397	0.142742582197273
0.978334461746784	0.118407960199005		0.873893805309734	0.350243902439024		0.963576158940397	0.142943063352045
0.977657413676371	0.118407960199005		0.873893805309734	0.350731707317073		0.963576158940397	0.143143544506816
0.977657413676371	0.118573797678275		0.873893805309734	0.351219512195122		0.963576158940397	0.143344025661588
0.976980365605958	0.118573797678275		0.873893805309734	0.351707317073171		0.963576158940397	0.143544506816359
0.976303317535545	0.118573797678275		0.873893805309734	0.352195121951219		0.963576158940397	0.143744987971131
0.976303317535545	0.118739635157546		0.873893805309734	0.352682926829268		0.963576158940397	0.143945469125902
0.976303317535545	0.118905472636816		0.873893805309734	0.353170731707317		0.963576158940397	0.144145950280674
0.976303317535545	0.119071310116086		0.873893805309734	0.353658536585366		0.963576158940397	0.144346431435445
0.976303317535545	0.119237147595357		0.873893805309734	0.354146341463415		0.963576158940397	0.144546912590217
0.976303317535545	0.119402985074627		0.873893805309734	0.354634146341463		0.963576158940397	0.144747393744988
0.976303317535545	0.119568822553897		0.873893805309734	0.355121951219512		0.963576158940397	0.144947874899759
0.976303317535545	0.119734660033167		0.873893805309734	0.355609756097561		0.963576158940397	0.145148356054531
0.976303317535545	0.119900497512438		0.873893805309734	0.35609756097561		0.963576158940397	0.145348837209302
0.976303317535545	0.120066334991708		0.873893805309734	0.356585365853659		0.963576158940397	0.145549318364074
0.976303317535545	0.120232172470978		0.873893805309734	0.357073170731707		0.963576158940397	0.145749799518845
0.976303317535545	0.120398009950249		0.873893805309734	0.357560975609756		0.963576158940397	0.145950280673617
0.975626269465132	0.120398009950249		0.873893805309734	0.358048780487805		0.963576158940397	0.146150761828388
0.975626269465132	0.120563847429519		0.873893805309734	0.358536585365854		0.963576158940397	0.14635124298316
0.975626269465132	0.120729684908789		0.873893805309734	0.359024390243902		0.963576158940397	0.146551724137931
0.975626269465132	0.12089552238806		0.873893805309734	0.359512195121951		0.963576158940397	0.146752205292702
0.975626269465132	0.12106135986733		0.873893805309734	0.36		0.963576158940397	0.146952686447474
0.975626269465132	0.1212271973466		0.873893805309734	0.360487804878049		0.963576158940397	0.147153167602245
0.975626269465132	0.121393034825871		0.873893805309734	0.360975609756098		0.963576158940397	0.147353648757017
0.975626269465132	0.121558872305141		0.873893805309734	0.361463414634146		0.963576158940397	0.147554129911788
0.975626269465132	0.121724709784411		0.873893805309734	0.361951219512195		0.963576158940397	0.14775461106656
0.975626269465132	0.121890547263682		0.873893805309734	0.362439024390244		0.963576158940397	0.147955092221331
0.975626269465132	0.122056384742952		0.873893805309734	0.362926829268293		0.963576158940397	0.148155573376103
0.975626269465132	0.122222222222222		0.873893805309734	0.363414634146341		0.963576158940397	0.148356054530874
0.975626269465132	0.122388059701493		0.873893805309734	0.36390243902439		0.963576158940397	0.148556535685646
0.975626269465132	0.122553897180763		0.873893805309734	0.364390243902439		0.963576158940397	0.148757016840417
0.975626269465132	0.122719734660033		0.873893805309734	0.364878048780488		0.963576158940397	0.148957497995188
0.975626269465132	0.122885572139303		0.873893805309734	0.365365853658537		0.963576158940397	0.14915797914996
0.975626269465132	0.123051409618574		0.873893805309734	0.365853658536585		0.963576158940397	0.149358460304731
0.975626269465132	0.123217247097844		0.873893805309734	0.366341463414634		0.963576158940397	0.149558941459503
0.975626269465132	0.123383084577114		0.873893805309734	0.366829268292683		0.963576158940397	0.149759422614274
0.975626269465132	0.123548922056385		0.873893805309734	0.367317073170732		0.963576158940397	0.149959903769046
0.974949221394719	0.123548922056385		0.873893805309734	0.36780487804878		0.963576158940397	0.150160384923817
0.974949221394719	0.123714759535655		0.873893805309734	0.368292682926829		0.963576158940397	0.150360866078589
0.974949221394719	0.123880597014925		0.871681415929204	0.368292682926829		0.963576158940397	0.15056134723336
0.974949221394719	0.124046434494196		0.871681415929204	0.368780487804878		0.963576158940397	0.150761828388132
0.974949221394719	0.124212271973466		0.869469026548673	0.368780487804878		0.963576158940397	0.150962309542903
0.974949221394719	0.124378109452736		0.867256637168142	0.368780487804878		0.963576158940397	0.151162790697674
0.974949221394719	0.124543946932007		0.867256637168142	0.369268292682927		0.963576158940397	0.151363271852446
0.974949221394719	0.124709784411277		0.867256637168142	0.369756097560976		0.963576158940397	0.151563753007217
0.974949221394719	0.124875621890547		0.867256637168142	0.370243902439024		0.963576158940397	0.151764234161989
0.974949221394719	0.125041459369818		0.867256637168142	0.370731707317073		0.963576158940397	0.15196471531676
0.974949221394719	0.125207296849088		0.867256637168142	0.371219512195122		0.963576158940397	0.152165196471532
0.974949221394719	0.125373134328358		0.865044247787611	0.371219512195122		0.963576158940397	0.152365677626303
0.974949221394719	0.125538971807629		0.865044247787611	0.371707317073171		0.962472406181015	0.152365677626303
0.974272173324306	0.125538971807629		0.865044247787611	0.37219512195122		0.962472406181015	0.152566158781075
0.974272173324306	0.125704809286899		0.865044247787611	0.372682926829268		0.962472406181015	0.152766639935846
0.974272173324306	0.125870646766169		0.865044247787611	0.373170731707317		0.962472406181015	0.152967121090617
0.974272173324306	0.126036484245439		0.865044247787611	0.373658536585366		0.962472406181015	0.153167602245389
0.973595125253893	0.126036484245439		0.865044247787611	0.374146341463415		0.962472406181015	0.15336808340016
0.973595125253893	0.12620232172471		0.865044247787611	0.374634146341463		0.962472406181015	0.153568564554932
0.973595125253893	0.12636815920398		0.865044247787611	0.375121951219512		0.962472406181015	0.153769045709703
0.973595125253893	0.12653399668325		0.865044247787611	0.375609756097561		0.962472406181015	0.153969526864475
0.973595125253893	0.126699834162521		0.865044247787611	0.37609756097561		0.962472406181015	0.154170008019246
0.973595125253893	0.126865671641791		0.86283185840708	0.37609756097561		0.962472406181015	0.154370489174018
0.973595125253893	0.127031509121061		0.860619469026549	0.37609756097561		0.962472406181015	0.154570970328789
0.973595125253893	0.127197346600332		0.860619469026549	0.376585365853659		0.962472406181015	0.154771451483561
0.973595125253893	0.127363184079602		0.858407079646018	0.376585365853659		0.962472406181015	0.154971932638332
0.973595125253893	0.127529021558872		0.858407079646018	0.377073170731707		0.962472406181015	0.155172413793103
0.973595125253893	0.127694859038143		0.858407079646018	0.377560975609756		0.962472406181015	0.155372894947875
0.973595125253893	0.127860696517413		0.858407079646018	0.378048780487805		0.962472406181015	0.155573376102646
0.973595125253893	0.128026533996683		0.858407079646018	0.378536585365854		0.962472406181015	0.155773857257418
0.973595125253893	0.128192371475954		0.858407079646018	0.379024390243902		0.962472406181015	0.155974338412189
0.973595125253893	0.128358208955224		0.858407079646018	0.379512195121951		0.962472406181015	0.156174819566961
0.973595125253893	0.128524046434494		0.858407079646018	0.38		0.962472406181015	0.156375300721732
0.973595125253893	0.128689883913765		0.858407079646018	0.380487804878049		0.962472406181015	0.156575781876504
0.973595125253893	0.128855721393035		0.858407079646018	0.380975609756098		0.962472406181015	0.156776263031275
0.973595125253893	0.129021558872305		0.858407079646018	0.381463414634146		0.962472406181015	0.156976744186047
0.973595125253893	0.129187396351575		0.856194690265487	0.381463414634146		0.962472406181015	0.157177225340818
0.973595125253893	0.129353233830846		0.856194690265487	0.381951219512195		0.962472406181015	0.157377706495589
0.973595125253893	0.129519071310116		0.856194690265487	0.382439024390244		0.962472406181015	0.157578187650361
0.973595125253893	0.129684908789386		0.853982300884956	0.382439024390244		0.961368653421634	0.157578187650361
0.97291807718348	0.129684908789386		0.853982300884956	0.382926829268293		0.961368653421634	0.157778668805132
0.97291807718348	0.129850746268657		0.853982300884956	0.383414634146341		0.961368653421634	0.157979149959904
0.97291807718348	0.130016583747927		0.853982300884956	0.38390243902439		0.961368653421634	0.158179631114675
0.97291807718348	0.130182421227197		0.853982300884956	0.384390243902439		0.961368653421634	0.158380112269447
0.97291807718348	0.130348258706468		0.853982300884956	0.384878048780488		0.961368653421634	0.158580593424218
0.97291807718348	0.130514096185738		0.853982300884956	0.385365853658537		0.961368653421634	0.15878107457899
0.97291807718348	0.130679933665008		0.853982300884956	0.385853658536585		0.961368653421634	0.158981555733761
0.97291807718348	0.130845771144279		0.853982300884956	0.386341463414634		0.961368653421634	0.159182036888532
0.97291807718348	0.131011608623549		0.851769911504425	0.390243902439024		0.961368653421634	0.159382518043304
0.97291807718348	0.131177446102819		0.851769911504425	0.390731707317073		0.961368653421634	0.159582999198075
0.97291807718348	0.13134328358209		0.851769911504425	0.391219512195122		0.961368653421634	0.159783480352847
0.97291807718348	0.13150912106136		0.851769911504425	0.391707317073171		0.961368653421634	0.159983961507618
0.97291807718348	0.13167495854063		0.851769911504425	0.39219512195122		0.961368653421634	0.16018444266239
0.97291807718348	0.131840796019901		0.851769911504425	0.392682926829268		0.961368653421634	0.160384923817161
0.972241029113067	0.131840796019901		0.851769911504425	0.393170731707317		0.961368653421634	0.160585404971933
0.972241029113067	0.132006633499171		0.851769911504425	0.393658536585366		0.961368653421634	0.160785886126704
0.972241029113067	0.132172470978441		0.851769911504425	0.394146341463415		0.961368653421634	0.160986367281476
0.972241029113067	0.132338308457711		0.849557522123894	0.394146341463415		0.961368653421634	0.161186848436247
0.972241029113067	0.132504145936982		0.849557522123894	0.394634146341463		0.961368653421634	0.161387329591018
0.972241029113067	0.132669983416252		0.849557522123894	0.395121951219512		0.961368653421634	0.16158781074579
0.972241029113067	0.132835820895522		0.849557522123894	0.395609756097561		0.961368653421634	0.161788291900561
0.972241029113067	0.133001658374793		0.849557522123894	0.39609756097561		0.961368653421634	0.161988773055333
0.972241029113067	0.133167495854063		0.849557522123894	0.396585365853659		0.961368653421634	0.162189254210104
0.972241029113067	0.133333333333333		0.849557522123894	0.397073170731707		0.961368653421634	0.162389735364876
0.972241029113067	0.133499170812604		0.849557522123894	0.397560975609756		0.961368653421634	0.162590216519647
0.972241029113067	0.133665008291874		0.849557522123894	0.398048780487805		0.961368653421634	0.162790697674419
0.972241029113067	0.133830845771144		0.849557522123894	0.398536585365854		0.961368653421634	0.16299117882919
0.972241029113067	0.133996683250415		0.849557522123894	0.399024390243902		0.961368653421634	0.163191659983962
0.972241029113067	0.134162520729685		0.849557522123894	0.402926829268293		0.961368653421634	0.163392141138733
0.972241029113067	0.134328358208955		0.847345132743363	0.402926829268293		0.961368653421634	0.163592622293504
0.972241029113067	0.134494195688226		0.847345132743363	0.403414634146341		0.961368653421634	0.163793103448276
0.972241029113067	0.134660033167496		0.845132743362832	0.403414634146341		0.961368653421634	0.163993584603047
0.972241029113067	0.134825870646766		0.845132743362832	0.40390243902439		0.961368653421634	0.164194065757819
0.972241029113067	0.134991708126036		0.842920353982301	0.40390243902439		0.961368653421634	0.16439454691259
0.972241029113067	0.135157545605307		0.842920353982301	0.404390243902439		0.961368653421634	0.164595028067362
0.972241029113067	0.135323383084577		0.842920353982301	0.404878048780488		0.961368653421634	0.164795509222133
0.972241029113067	0.135489220563847		0.842920353982301	0.405365853658537		0.961368653421634	0.164995990376905
0.972241029113067	0.135655058043118		0.842920353982301	0.405853658536585		0.961368653421634	0.165196471531676
0.972241029113067	0.135820895522388		0.842920353982301	0.406341463414634		0.961368653421634	0.165396952686447
0.972241029113067	0.135986733001658		0.842920353982301	0.406829268292683		0.961368653421634	0.165597433841219
0.972241029113067	0.136152570480929		0.842920353982301	0.407317073170732		0.961368653421634	0.16579791499599
0.972241029113067	0.136318407960199		0.842920353982301	0.40780487804878		0.961368653421634	0.165998396150762
0.972241029113067	0.136484245439469		0.842920353982301	0.408292682926829		0.961368653421634	0.166198877305533
0.972241029113067	0.13665008291874		0.842920353982301	0.408780487804878		0.961368653421634	0.166399358460305
0.972241029113067	0.13681592039801		0.842920353982301	0.409268292682927		0.961368653421634	0.166599839615076
0.972241029113067	0.13698175787728		0.842920353982301	0.409756097560976		0.961368653421634	0.166800320769848
0.972241029113067	0.137147595356551		0.842920353982301	0.410243902439024		0.961368653421634	0.167000801924619
0.972241029113067	0.137313432835821		0.842920353982301	0.410731707317073		0.961368653421634	0.167201283079391
0.972241029113067	0.137479270315091		0.842920353982301	0.411219512195122		0.961368653421634	0.167401764234162
0.971563981042654	0.137479270315091		0.842920353982301	0.411707317073171		0.961368653421634	0.167602245388933
0.971563981042654	0.137645107794362		0.842920353982301	0.412195121951219		0.961368653421634	0.167802726543705
0.971563981042654	0.137810945273632		0.842920353982301	0.412682926829268		0.961368653421634	0.168003207698476
0.970886932972241	0.137810945273632		0.842920353982301	0.413170731707317		0.961368653421634	0.168203688853248
0.970886932972241	0.137976782752902		0.842920353982301	0.413658536585366		0.961368653421634	0.168404170008019
0.970886932972241	0.138142620232172		0.842920353982301	0.414146341463415		0.961368653421634	0.168604651162791
0.970886932972241	0.138308457711443		0.84070796460177	0.414146341463415		0.961368653421634	0.168805132317562
0.970886932972241	0.138474295190713		0.84070796460177	0.414634146341463		0.961368653421634	0.169005613472334
0.970886932972241	0.138640132669983		0.838495575221239	0.414634146341463		0.961368653421634	0.169206094627105
0.970886932972241	0.138805970149254		0.836283185840708	0.414634146341463		0.961368653421634	0.169406575781877
0.970886932972241	0.138971807628524		0.836283185840708	0.415121951219512		0.961368653421634	0.169607056936648
0.970886932972241	0.139137645107794		0.834070796460177	0.415121951219512		0.961368653421634	0.169807538091419
0.970886932972241	0.139303482587065		0.834070796460177	0.415609756097561		0.961368653421634	0.170008019246191
0.970886932972241	0.139469320066335		0.831858407079646	0.415609756097561		0.961368653421634	0.170208500400962
0.970886932972241	0.139635157545605		0.829646017699115	0.415609756097561		0.961368653421634	0.170408981555734
0.970886932972241	0.139800995024876		0.829646017699115	0.41609756097561		0.961368653421634	0.170609462710505
0.970886932972241	0.139966832504146		0.829646017699115	0.416585365853659		0.961368653421634	0.170809943865277
0.970886932972241	0.140132669983416		0.829646017699115	0.417073170731707		0.961368653421634	0.171010425020048
0.970886932972241	0.140298507462687		0.829646017699115	0.417560975609756		0.961368653421634	0.17121090617482
0.970886932972241	0.140464344941957		0.829646017699115	0.418048780487805		0.961368653421634	0.171411387329591
0.970886932972241	0.140630182421227		0.829646017699115	0.418536585365854		0.961368653421634	0.171611868484362
0.970209884901828	0.140630182421227		0.829646017699115	0.419024390243902		0.961368653421634	0.171812349639134
0.970209884901828	0.140796019900498		0.829646017699115	0.419512195121951		0.961368653421634	0.172012830793905
0.970209884901828	0.140961857379768		0.829646017699115	0.42		0.961368653421634	0.172213311948677
0.970209884901828	0.141127694859038		0.829646017699115	0.420487804878049		0.961368653421634	0.172413793103448
0.970209884901828	0.141293532338308		0.829646017699115	0.420975609756098		0.961368653421634	0.17261427425822
0.970209884901828	0.141459369817579		0.829646017699115	0.421463414634146		0.961368653421634	0.172814755412991
0.970209884901828	0.141625207296849		0.829646017699115	0.421951219512195		0.961368653421634	0.173015236567763
0.970209884901828	0.141791044776119		0.829646017699115	0.422439024390244		0.961368653421634	0.173215717722534
0.970209884901828	0.14195688225539		0.829646017699115	0.422926829268293		0.961368653421634	0.173416198877306
0.970209884901828	0.14212271973466		0.829646017699115	0.423414634146341		0.961368653421634	0.173616680032077
0.970209884901828	0.14228855721393		0.829646017699115	0.42390243902439		0.961368653421634	0.173817161186848
0.970209884901828	0.142454394693201		0.829646017699115	0.424390243902439		0.961368653421634	0.17401764234162
0.970209884901828	0.142620232172471		0.829646017699115	0.424878048780488		0.961368653421634	0.174218123496391
0.970209884901828	0.142786069651741		0.829646017699115	0.425365853658537		0.961368653421634	0.174418604651163
0.970209884901828	0.142951907131012		0.829646017699115	0.425853658536585		0.961368653421634	0.174619085805934
0.969532836831415	0.142951907131012		0.829646017699115	0.426341463414634		0.961368653421634	0.174819566960706
0.969532836831415	0.143117744610282		0.829646017699115	0.426829268292683		0.961368653421634	0.175020048115477
0.969532836831415	0.143283582089552		0.829646017699115	0.427317073170732		0.961368653421634	0.175220529270249
0.969532836831415	0.143449419568823		0.829646017699115	0.42780487804878		0.961368653421634	0.17542101042502
0.968855788761002	0.143449419568823		0.829646017699115	0.428292682926829		0.961368653421634	0.175621491579792
0.968855788761002	0.143615257048093		0.829646017699115	0.428780487804878		0.961368653421634	0.175821972734563
0.968855788761002	0.143781094527363		0.829646017699115	0.429268292682927		0.961368653421634	0.176022453889334
0.968855788761002	0.143946932006633		0.827433628318584	0.429268292682927		0.961368653421634	0.176222935044106
0.968855788761002	0.144112769485904		0.827433628318584	0.429756097560976		0.961368653421634	0.176423416198877
0.968855788761002	0.144278606965174		0.827433628318584	0.430243902439024		0.961368653421634	0.176623897353649
0.968855788761002	0.144444444444444		0.827433628318584	0.430731707317073		0.961368653421634	0.17682437850842
0.968855788761002	0.144610281923715		0.827433628318584	0.431219512195122		0.961368653421634	0.177024859663192
0.968855788761002	0.144776119402985		0.827433628318584	0.431707317073171		0.961368653421634	0.177225340817963
0.968855788761002	0.144941956882255		0.827433628318584	0.43219512195122		0.961368653421634	0.177425821972735
0.968855788761002	0.145107794361526		0.827433628318584	0.432682926829268		0.961368653421634	0.177626303127506
0.968855788761002	0.145273631840796		0.827433628318584	0.433170731707317		0.961368653421634	0.177826784282277
0.968855788761002	0.145439469320066		0.825221238938053	0.433170731707317		0.961368653421634	0.178027265437049
0.968855788761002	0.145605306799337		0.825221238938053	0.433658536585366		0.961368653421634	0.17822774659182
0.968855788761002	0.145771144278607		0.825221238938053	0.434146341463415		0.961368653421634	0.178428227746592
0.968855788761002	0.145936981757877		0.825221238938053	0.434634146341463		0.961368653421634	0.178628708901363
0.968855788761002	0.146102819237148		0.825221238938053	0.435121951219512		0.961368653421634	0.178829190056135
0.968178740690589	0.146102819237148		0.825221238938053	0.435609756097561		0.961368653421634	0.179029671210906
0.968178740690589	0.146268656716418		0.825221238938053	0.43609756097561		0.961368653421634	0.179230152365678
0.968178740690589	0.146434494195688		0.825221238938053	0.436585365853659		0.961368653421634	0.179430633520449
0.968178740690589	0.146600331674959		0.825221238938053	0.437073170731707		0.961368653421634	0.179631114675221
0.968178740690589	0.146766169154229		0.825221238938053	0.437560975609756		0.961368653421634	0.179831595829992
0.968178740690589	0.146932006633499		0.825221238938053	0.438048780487805		0.961368653421634	0.180032076984763
0.968178740690589	0.147097844112769		0.823008849557522	0.438048780487805		0.961368653421634	0.180232558139535
0.967501692620176	0.147097844112769		0.820796460176991	0.438048780487805		0.961368653421634	0.180433039294306
0.967501692620176	0.14726368159204		0.820796460176991	0.438536585365854		0.961368653421634	0.180633520449078
0.967501692620176	0.14742951907131		0.820796460176991	0.439024390243902		0.961368653421634	0.180834001603849
0.967501692620176	0.14759535655058		0.820796460176991	0.439512195121951		0.961368653421634	0.181034482758621
0.967501692620176	0.147761194029851		0.81858407079646	0.439512195121951		0.961368653421634	0.181234963913392
0.967501692620176	0.147927031509121		0.81858407079646	0.44		0.961368653421634	0.181435445068164
0.967501692620176	0.148092868988391		0.81858407079646	0.440487804878049		0.961368653421634	0.181635926222935
0.967501692620176	0.148258706467662		0.81858407079646	0.440975609756098		0.961368653421634	0.181836407377706
0.967501692620176	0.148424543946932		0.81858407079646	0.441463414634146		0.960264900662252	0.181836407377706
0.967501692620176	0.148590381426202		0.81858407079646	0.441951219512195		0.960264900662252	0.182036888532478
0.967501692620176	0.148756218905473		0.81858407079646	0.442439024390244		0.960264900662252	0.182237369687249
0.967501692620176	0.148922056384743		0.81858407079646	0.442926829268293		0.960264900662252	0.182437850842021
0.967501692620176	0.149087893864013		0.816371681415929	0.446341463414634		0.960264900662252	0.182638331996792
0.967501692620176	0.149253731343284		0.816371681415929	0.446829268292683		0.960264900662252	0.182838813151564
0.967501692620176	0.149419568822554		0.816371681415929	0.447317073170732		0.960264900662252	0.183039294306335
0.967501692620176	0.149585406301824		0.814159292035398	0.447317073170732		0.960264900662252	0.183239775461107
0.967501692620176	0.149751243781095		0.814159292035398	0.44780487804878		0.960264900662252	0.183440256615878
0.966824644549763	0.149751243781095		0.814159292035398	0.448292682926829		0.960264900662252	0.18364073777065
0.966824644549763	0.149917081260365		0.814159292035398	0.448780487804878		0.95916114790287	0.18364073777065
0.966824644549763	0.150082918739635		0.814159292035398	0.449268292682927		0.95916114790287	0.183841218925421
0.966824644549763	0.150248756218905		0.814159292035398	0.449756097560976		0.95916114790287	0.184041700080192
0.966824644549763	0.150414593698176		0.814159292035398	0.450243902439024		0.95916114790287	0.184242181234964
0.966824644549763	0.150580431177446		0.814159292035398	0.450731707317073		0.95916114790287	0.184442662389735
0.966824644549763	0.150746268656716		0.814159292035398	0.451219512195122		0.95916114790287	0.184643143544507
0.966824644549763	0.150912106135987		0.814159292035398	0.451707317073171		0.95916114790287	0.184843624699278
0.966824644549763	0.151077943615257		0.814159292035398	0.45219512195122		0.95916114790287	0.18504410585405
0.966824644549763	0.151243781094527		0.814159292035398	0.452682926829268		0.95916114790287	0.185244587008821
0.966824644549763	0.151409618573798		0.814159292035398	0.453170731707317		0.95916114790287	0.185445068163593
0.966824644549763	0.151575456053068		0.814159292035398	0.453658536585366		0.95916114790287	0.185645549318364
0.966824644549763	0.151741293532338		0.811946902654867	0.453658536585366		0.95916114790287	0.185846030473136
0.966824644549763	0.151907131011609		0.811946902654867	0.454146341463415		0.95916114790287	0.186046511627907
0.96614759647935	0.151907131011609		0.811946902654867	0.454634146341463		0.95916114790287	0.186246992782678
0.96614759647935	0.152072968490879		0.811946902654867	0.45609756097561		0.95916114790287	0.18644747393745
0.96614759647935	0.152238805970149		0.811946902654867	0.456585365853659		0.95916114790287	0.186647955092221
0.96614759647935	0.15240464344942		0.811946902654867	0.457073170731707		0.95916114790287	0.186848436246993
0.96614759647935	0.15257048092869		0.811946902654867	0.457560975609756		0.95916114790287	0.187048917401764
0.96614759647935	0.15273631840796		0.811946902654867	0.458048780487805		0.95916114790287	0.187249398556536
0.96614759647935	0.152902155887231		0.811946902654867	0.458536585365854		0.95916114790287	0.187449879711307
0.96614759647935	0.153067993366501		0.811946902654867	0.459024390243902		0.95916114790287	0.187650360866079
0.96614759647935	0.153233830845771		0.811946902654867	0.459512195121951		0.95916114790287	0.18785084202085
0.96614759647935	0.153399668325041		0.811946902654867	0.46		0.95916114790287	0.188051323175621
0.96614759647935	0.153565505804312		0.811946902654867	0.460487804878049		0.95916114790287	0.188251804330393
0.96614759647935	0.153731343283582		0.809734513274336	0.460487804878049		0.95916114790287	0.188452285485164
0.96614759647935	0.153897180762852		0.809734513274336	0.460975609756098		0.95916114790287	0.188652766639936
0.96614759647935	0.154063018242123		0.809734513274336	0.461463414634146		0.95916114790287	0.188853247794707
0.965470548408937	0.154063018242123		0.809734513274336	0.461951219512195		0.95916114790287	0.189053728949479
0.965470548408937	0.154228855721393		0.809734513274336	0.462439024390244		0.95916114790287	0.18925421010425
0.965470548408937	0.154394693200663		0.809734513274336	0.462926829268293		0.95916114790287	0.189454691259022
0.965470548408937	0.154560530679934		0.809734513274336	0.463414634146341		0.95916114790287	0.189655172413793
0.965470548408937	0.154726368159204		0.809734513274336	0.46390243902439		0.95916114790287	0.189855653568565
0.965470548408937	0.154892205638474		0.809734513274336	0.464390243902439		0.95916114790287	0.190056134723336
0.965470548408937	0.155058043117745		0.809734513274336	0.464878048780488		0.95916114790287	0.190256615878107
0.965470548408937	0.155223880597015		0.809734513274336	0.465365853658537		0.95916114790287	0.190457097032879
0.965470548408937	0.155389718076285		0.809734513274336	0.465853658536585		0.95916114790287	0.19065757818765
0.965470548408937	0.155555555555556		0.809734513274336	0.466341463414634		0.95916114790287	0.190858059342422
0.965470548408937	0.155721393034826		0.809734513274336	0.466829268292683		0.95916114790287	0.191058540497193
0.965470548408937	0.155887230514096		0.807522123893805	0.466829268292683		0.95916114790287	0.191259021651965
0.965470548408937	0.156053067993366		0.807522123893805	0.467317073170732		0.95916114790287	0.191459502806736
0.965470548408937	0.156218905472637		0.807522123893805	0.467804878048781		0.95916114790287	0.191659983961508
0.965470548408937	0.156384742951907		0.807522123893805	0.468292682926829		0.95916114790287	0.191860465116279
0.965470548408937	0.156550580431177		0.807522123893805	0.468780487804878		0.95916114790287	0.192060946271051
0.964793500338524	0.156550580431177		0.807522123893805	0.469268292682927		0.95916114790287	0.192261427425822
0.964793500338524	0.156716417910448		0.807522123893805	0.469756097560976		0.95916114790287	0.192461908580593
0.964793500338524	0.156882255389718		0.805309734513274	0.469756097560976		0.95916114790287	0.192662389735365
0.964793500338524	0.157048092868988		0.803097345132743	0.469756097560976		0.95916114790287	0.192862870890136
0.964793500338524	0.157213930348259		0.803097345132743	0.470243902439024		0.95916114790287	0.193063352044908
0.964793500338524	0.157379767827529		0.803097345132743	0.470731707317073		0.95916114790287	0.193263833199679
0.964793500338524	0.157545605306799		0.803097345132743	0.471219512195122		0.95916114790287	0.193464314354451
0.964793500338524	0.15771144278607		0.803097345132743	0.471707317073171		0.95916114790287	0.193664795509222
0.964793500338524	0.15787728026534		0.800884955752212	0.471707317073171		0.95916114790287	0.193865276663994
0.964793500338524	0.15804311774461		0.800884955752212	0.472195121951219		0.958057395143488	0.193865276663994
0.964793500338524	0.158208955223881		0.800884955752212	0.472682926829268		0.958057395143488	0.194065757818765
0.964793500338524	0.158374792703151		0.798672566371681	0.472682926829268		0.958057395143488	0.194266238973536
0.964793500338524	0.158540630182421		0.798672566371681	0.473170731707317		0.958057395143488	0.194466720128308
0.964793500338524	0.158706467661692		0.798672566371681	0.473658536585366		0.958057395143488	0.194667201283079
0.964793500338524	0.158872305140962		0.798672566371681	0.474146341463415		0.958057395143488	0.194867682437851
0.964793500338524	0.159038142620232		0.798672566371681	0.474634146341463		0.958057395143488	0.195068163592622
0.964793500338524	0.159203980099502		0.798672566371681	0.475121951219512		0.958057395143488	0.195268644747394
0.964793500338524	0.159369817578773		0.798672566371681	0.475609756097561		0.958057395143488	0.195469125902165
0.964793500338524	0.159535655058043		0.798672566371681	0.47609756097561		0.958057395143488	0.195669607056937
0.964793500338524	0.159701492537313		0.798672566371681	0.476585365853659		0.958057395143488	0.195870088211708
0.964793500338524	0.159867330016584		0.79646017699115	0.476585365853659		0.956953642384106	0.195870088211708
0.964116452268111	0.159867330016584		0.79646017699115	0.477073170731707		0.956953642384106	0.19607056936648
0.964116452268111	0.160033167495854		0.79646017699115	0.477560975609756		0.956953642384106	0.196271050521251
0.964116452268111	0.160199004975124		0.794247787610619	0.477560975609756		0.956953642384106	0.196471531676022
0.964116452268111	0.160364842454395		0.794247787610619	0.478048780487805		0.956953642384106	0.196672012830794
0.964116452268111	0.160530679933665		0.792035398230089	0.478048780487805		0.956953642384106	0.196872493985565
0.964116452268111	0.160696517412935		0.792035398230089	0.478536585365854		0.956953642384106	0.197072975140337
0.964116452268111	0.160862354892206		0.792035398230089	0.479024390243902		0.956953642384106	0.197273456295108
0.964116452268111	0.161028192371476		0.792035398230089	0.479512195121951		0.956953642384106	0.19747393744988
0.964116452268111	0.161194029850746		0.792035398230089	0.48		0.956953642384106	0.197674418604651
0.964116452268111	0.161359867330017		0.792035398230089	0.480487804878049		0.956953642384106	0.197874899759423
0.964116452268111	0.161525704809287		0.792035398230089	0.480975609756098		0.956953642384106	0.198075380914194
0.964116452268111	0.161691542288557		0.792035398230089	0.481463414634146		0.956953642384106	0.198275862068966
0.964116452268111	0.161857379767828		0.789823008849557	0.481463414634146		0.955849889624724	0.198275862068966
0.964116452268111	0.162023217247098		0.789823008849557	0.481951219512195		0.955849889624724	0.198476343223737
0.964116452268111	0.162189054726368		0.787610619469027	0.481951219512195		0.955849889624724	0.198676824378508
0.964116452268111	0.162354892205638		0.787610619469027	0.482439024390244		0.955849889624724	0.19887730553328
0.964116452268111	0.162520729684909		0.787610619469027	0.482926829268293		0.955849889624724	0.199077786688051
0.964116452268111	0.162686567164179		0.787610619469027	0.483414634146341		0.955849889624724	0.199278267842823
0.964116452268111	0.162852404643449		0.787610619469027	0.48390243902439		0.955849889624724	0.199478748997594
0.964116452268111	0.16301824212272		0.787610619469027	0.484390243902439		0.955849889624724	0.199679230152366
0.964116452268111	0.16318407960199		0.787610619469027	0.484878048780488		0.955849889624724	0.199879711307137
0.964116452268111	0.16334991708126		0.787610619469027	0.485365853658537		0.955849889624724	0.200080192461909
0.964116452268111	0.163515754560531		0.787610619469027	0.485853658536585		0.955849889624724	0.20028067361668
0.964116452268111	0.163681592039801		0.787610619469027	0.486341463414634		0.955849889624724	0.200481154771451
0.964116452268111	0.163847429519071		0.787610619469027	0.486829268292683		0.955849889624724	0.200681635926223
0.964116452268111	0.164013266998342		0.787610619469027	0.487317073170732		0.955849889624724	0.200882117080994
0.964116452268111	0.164179104477612		0.787610619469027	0.48780487804878		0.955849889624724	0.201082598235766
0.963439404197698	0.164179104477612		0.787610619469027	0.488292682926829		0.955849889624724	0.201283079390537
0.963439404197698	0.164344941956882		0.787610619469027	0.488780487804878		0.954746136865342	0.201283079390537
0.963439404197698	0.164510779436153		0.787610619469027	0.489268292682927		0.954746136865342	0.201483560545309
0.963439404197698	0.164676616915423		0.787610619469027	0.489756097560976		0.954746136865342	0.20168404170008
0.963439404197698	0.164842454394693		0.787610619469027	0.490243902439024		0.954746136865342	0.201884522854852
0.962762356127285	0.164842454394693		0.787610619469027	0.490731707317073		0.954746136865342	0.202085004009623
0.962085308056872	0.164842454394693		0.787610619469027	0.491219512195122		0.954746136865342	0.202285485164395
0.962085308056872	0.165008291873964		0.787610619469027	0.491707317073171		0.954746136865342	0.202485966319166
0.961408259986459	0.165008291873964		0.787610619469027	0.49219512195122		0.954746136865342	0.202686447473937
0.961408259986459	0.165174129353234		0.787610619469027	0.492682926829268		0.954746136865342	0.202886928628709
0.961408259986459	0.165339966832504		0.787610619469027	0.493170731707317		0.954746136865342	0.20308740978348
0.961408259986459	0.165505804311774		0.787610619469027	0.493658536585366		0.954746136865342	0.203287890938252
0.961408259986459	0.165671641791045		0.787610619469027	0.494146341463415		0.954746136865342	0.203488372093023
0.960731211916046	0.165671641791045		0.787610619469027	0.494634146341463		0.954746136865342	0.203688853247795
0.960731211916046	0.165837479270315		0.787610619469027	0.495121951219512		0.954746136865342	0.203889334402566
0.960731211916046	0.166003316749585		0.787610619469027	0.495609756097561		0.954746136865342	0.204089815557338
0.960731211916046	0.166169154228856		0.787610619469027	0.49609756097561		0.954746136865342	0.204290296712109
0.960731211916046	0.166334991708126		0.787610619469027	0.496585365853659		0.954746136865342	0.204490777866881
0.960731211916046	0.166500829187396		0.787610619469027	0.497073170731707		0.954746136865342	0.204691259021652
0.960731211916046	0.166666666666667		0.787610619469027	0.498048780487805		0.954746136865342	0.204891740176423
0.960731211916046	0.166832504145937		0.787610619469027	0.498536585365854		0.954746136865342	0.205092221331195
0.960731211916046	0.166998341625207		0.787610619469027	0.499024390243902		0.954746136865342	0.205292702485966
0.960731211916046	0.167164179104478		0.787610619469027	0.499512195121951		0.954746136865342	0.205493183640738
0.960731211916046	0.167330016583748		0.787610619469027	0.5		0.954746136865342	0.205693664795509
0.960731211916046	0.167495854063018		0.787610619469027	0.500487804878049		0.954746136865342	0.205894145950281
0.960731211916046	0.167661691542289		0.787610619469027	0.500975609756098		0.954746136865342	0.206094627105052
0.960731211916046	0.167827529021559		0.787610619469027	0.501463414634146		0.954746136865342	0.206295108259824
0.960731211916046	0.167993366500829		0.787610619469027	0.501951219512195		0.954746136865342	0.206495589414595
0.960054163845633	0.167993366500829		0.785398230088496	0.501951219512195		0.954746136865342	0.206696070569366
0.960054163845633	0.1681592039801		0.785398230088496	0.502439024390244		0.954746136865342	0.206896551724138
0.960054163845633	0.16832504145937		0.785398230088496	0.502926829268293		0.954746136865342	0.207097032878909
0.960054163845633	0.16849087893864		0.785398230088496	0.503414634146341		0.954746136865342	0.207297514033681
0.960054163845633	0.16865671641791		0.785398230088496	0.50390243902439		0.954746136865342	0.207497995188452
0.960054163845633	0.168822553897181		0.783185840707965	0.50390243902439		0.954746136865342	0.207698476343224
0.960054163845633	0.168988391376451		0.783185840707965	0.504390243902439		0.954746136865342	0.207898957497995
0.960054163845633	0.169154228855721		0.783185840707965	0.504878048780488		0.954746136865342	0.208099438652767
0.960054163845633	0.169320066334992		0.783185840707965	0.505365853658537		0.954746136865342	0.208299919807538
0.960054163845633	0.169485903814262		0.783185840707965	0.505853658536585		0.954746136865342	0.20850040096231
0.960054163845633	0.169651741293532		0.780973451327434	0.505853658536585		0.954746136865342	0.208700882117081
0.960054163845633	0.169817578772803		0.778761061946903	0.505853658536585		0.95364238410596	0.208700882117081
0.960054163845633	0.169983416252073		0.778761061946903	0.506341463414634		0.95364238410596	0.208901363271852
0.960054163845633	0.170149253731343		0.778761061946903	0.506829268292683		0.95364238410596	0.209101844426624
0.960054163845633	0.170315091210614		0.778761061946903	0.507317073170732		0.95364238410596	0.209302325581395
0.960054163845633	0.170480928689884		0.778761061946903	0.50780487804878		0.95364238410596	0.209502806736167
0.960054163845633	0.170646766169154		0.778761061946903	0.508292682926829		0.95364238410596	0.209703287890938
0.960054163845633	0.170812603648425		0.778761061946903	0.508780487804878		0.95364238410596	0.20990376904571
0.960054163845633	0.170978441127695		0.778761061946903	0.509268292682927		0.95364238410596	0.210104250200481
0.960054163845633	0.171144278606965		0.776548672566372	0.513658536585366		0.95364238410596	0.210304731355253
0.960054163845633	0.171310116086235		0.776548672566372	0.514146341463415		0.95364238410596	0.210505212510024
0.960054163845633	0.171475953565506		0.776548672566372	0.514634146341463		0.95364238410596	0.210705693664795
0.960054163845633	0.171641791044776		0.776548672566372	0.515121951219512		0.95364238410596	0.210906174819567
0.960054163845633	0.171807628524046		0.774336283185841	0.515121951219512		0.95364238410596	0.211106655974338
0.960054163845633	0.171973466003317		0.774336283185841	0.515609756097561		0.95364238410596	0.21130713712911
0.960054163845633	0.172139303482587		0.774336283185841	0.51609756097561		0.95364238410596	0.211507618283881
0.960054163845633	0.172305140961857		0.774336283185841	0.516585365853659		0.95364238410596	0.211708099438653
0.960054163845633	0.172470978441128		0.774336283185841	0.517073170731707		0.95364238410596	0.211908580593424
0.960054163845633	0.172636815920398		0.77212389380531	0.517073170731707		0.95364238410596	0.212109061748196
0.960054163845633	0.172802653399668		0.77212389380531	0.517560975609756		0.95364238410596	0.212309542902967
0.960054163845633	0.172968490878939		0.769911504424779	0.517560975609756		0.95364238410596	0.212510024057739
0.960054163845633	0.173134328358209		0.769911504424779	0.518048780487805		0.95364238410596	0.21271050521251
0.960054163845633	0.173300165837479		0.767699115044248	0.518048780487805		0.95364238410596	0.212910986367281
0.95937711577522	0.173300165837479		0.767699115044248	0.518536585365854		0.95364238410596	0.213111467522053
0.95937711577522	0.17346600331675		0.767699115044248	0.519024390243902		0.95364238410596	0.213311948676824
0.95937711577522	0.17363184079602		0.767699115044248	0.519512195121951		0.95364238410596	0.213512429831596
0.95937711577522	0.17379767827529		0.767699115044248	0.52		0.95364238410596	0.213712910986367
0.95937711577522	0.173963515754561		0.765486725663717	0.52		0.952538631346578	0.213712910986367
0.95937711577522	0.174129353233831		0.765486725663717	0.520487804878049		0.952538631346578	0.213913392141139
0.95937711577522	0.174295190713101		0.765486725663717	0.520975609756098		0.952538631346578	0.21411387329591
0.95937711577522	0.174461028192371		0.765486725663717	0.521463414634146		0.952538631346578	0.214314354450682
0.95937711577522	0.174626865671642		0.765486725663717	0.521951219512195		0.952538631346578	0.214514835605453
0.95937711577522	0.174792703150912		0.765486725663717	0.522439024390244		0.952538631346578	0.214715316760225
0.95937711577522	0.174958540630182		0.765486725663717	0.522926829268293		0.951434878587196	0.214715316760225
0.958700067704807	0.174958540630182		0.763274336283186	0.522926829268293		0.951434878587196	0.214915797914996
0.958700067704807	0.175124378109453		0.761061946902655	0.522926829268293		0.950331125827815	0.214915797914996
0.958700067704807	0.175290215588723		0.761061946902655	0.523414634146341		0.950331125827815	0.215116279069767
0.958700067704807	0.175456053067993		0.761061946902655	0.52390243902439		0.950331125827815	0.215316760224539
0.958700067704807	0.175621890547264		0.761061946902655	0.524390243902439		0.950331125827815	0.21551724137931
0.958700067704807	0.175787728026534		0.761061946902655	0.524878048780488		0.950331125827815	0.215717722534082
0.958700067704807	0.175953565505804		0.761061946902655	0.525365853658537		0.950331125827815	0.215918203688853
0.958700067704807	0.176119402985075		0.761061946902655	0.525853658536585		0.950331125827815	0.216118684843625
0.958700067704807	0.176285240464345		0.761061946902655	0.526341463414634		0.950331125827815	0.216319165998396
0.958700067704807	0.176451077943615		0.761061946902655	0.526829268292683		0.950331125827815	0.216519647153168
0.958700067704807	0.176616915422886		0.761061946902655	0.527317073170732		0.950331125827815	0.216720128307939
0.958700067704807	0.176782752902156		0.761061946902655	0.527804878048781		0.950331125827815	0.21692060946271
0.958700067704807	0.176948590381426		0.761061946902655	0.528292682926829		0.950331125827815	0.217121090617482
0.958700067704807	0.177114427860697		0.761061946902655	0.528780487804878		0.950331125827815	0.217321571772253
0.958700067704807	0.177280265339967		0.758849557522124	0.528780487804878		0.950331125827815	0.217522052927025
0.958700067704807	0.177446102819237		0.758849557522124	0.529268292682927		0.950331125827815	0.217722534081796
0.958700067704807	0.177611940298507		0.756637168141593	0.529268292682927		0.950331125827815	0.217923015236568
0.958700067704807	0.177777777777778		0.756637168141593	0.529756097560976		0.950331125827815	0.218123496391339
0.958700067704807	0.177943615257048		0.756637168141593	0.530243902439024		0.950331125827815	0.218323977546111
0.958700067704807	0.178109452736318		0.756637168141593	0.530731707317073		0.950331125827815	0.218524458700882
0.958700067704807	0.178275290215589		0.756637168141593	0.531219512195122		0.950331125827815	0.218724939855654
0.958700067704807	0.178441127694859		0.756637168141593	0.531707317073171		0.950331125827815	0.218925421010425
0.958700067704807	0.178606965174129		0.754424778761062	0.531707317073171		0.950331125827815	0.219125902165196
0.958700067704807	0.1787728026534		0.752212389380531	0.531707317073171		0.950331125827815	0.219326383319968
0.958700067704807	0.17893864013267		0.752212389380531	0.53219512195122		0.950331125827815	0.219526864474739
0.958700067704807	0.17910447761194		0.752212389380531	0.532682926829268		0.949227373068433	0.219526864474739
0.958700067704807	0.179270315091211		0.752212389380531	0.533170731707317		0.949227373068433	0.219727345629511
0.958700067704807	0.179436152570481		0.752212389380531	0.533658536585366		0.949227373068433	0.219927826784282
0.958700067704807	0.179601990049751		0.752212389380531	0.534146341463415		0.949227373068433	0.220128307939054
0.958700067704807	0.179767827529022		0.752212389380531	0.534634146341463		0.949227373068433	0.220328789093825
0.958700067704807	0.179933665008292		0.752212389380531	0.535121951219512		0.949227373068433	0.220529270248597
0.958700067704807	0.180099502487562		0.752212389380531	0.535609756097561		0.949227373068433	0.220729751403368
0.958700067704807	0.180265339966832		0.752212389380531	0.53609756097561		0.949227373068433	0.22093023255814
0.958700067704807	0.180431177446103		0.752212389380531	0.536585365853659		0.949227373068433	0.221130713712911
0.958023019634394	0.180431177446103		0.752212389380531	0.537073170731707		0.949227373068433	0.221331194867682
0.958023019634394	0.180597014925373		0.752212389380531	0.537560975609756		0.949227373068433	0.221531676022454
0.958023019634394	0.180762852404643		0.752212389380531	0.538048780487805		0.949227373068433	0.221732157177225
0.958023019634394	0.180928689883914		0.752212389380531	0.538536585365854		0.949227373068433	0.221932638331997
0.958023019634394	0.181094527363184		0.752212389380531	0.539024390243902		0.949227373068433	0.222133119486768
0.958023019634394	0.181260364842454		0.752212389380531	0.539512195121951		0.949227373068433	0.22233360064154
0.958023019634394	0.181426202321725		0.752212389380531	0.54		0.949227373068433	0.222534081796311
0.957345971563981	0.181426202321725		0.752212389380531	0.540487804878049		0.949227373068433	0.222734562951083
0.957345971563981	0.181592039800995		0.75	0.540487804878049		0.949227373068433	0.222935044105854
0.957345971563981	0.181757877280265		0.75	0.540975609756098		0.949227373068433	0.223135525260625
0.957345971563981	0.181923714759536		0.747787610619469	0.540975609756098		0.949227373068433	0.223336006415397
0.957345971563981	0.182089552238806		0.745575221238938	0.540975609756098		0.949227373068433	0.223536487570168
0.957345971563981	0.182255389718076		0.745575221238938	0.541463414634146		0.949227373068433	0.22373696872494
0.957345971563981	0.182421227197347		0.745575221238938	0.541951219512195		0.949227373068433	0.223937449879711
0.957345971563981	0.182587064676617		0.745575221238938	0.542439024390244		0.949227373068433	0.224137931034483
0.957345971563981	0.182752902155887		0.745575221238938	0.542926829268293		0.949227373068433	0.224338412189254
0.957345971563981	0.182918739635158		0.745575221238938	0.543414634146342		0.949227373068433	0.224538893344026
0.957345971563981	0.183084577114428		0.745575221238938	0.54390243902439		0.949227373068433	0.224739374498797
0.957345971563981	0.183250414593698		0.743362831858407	0.54390243902439		0.949227373068433	0.224939855653569
0.957345971563981	0.183416252072968		0.741150442477876	0.54390243902439		0.949227373068433	0.22514033680834
0.957345971563981	0.183582089552239		0.741150442477876	0.544390243902439		0.949227373068433	0.225340817963111
0.957345971563981	0.183747927031509		0.741150442477876	0.544878048780488		0.949227373068433	0.225541299117883
0.957345971563981	0.183913764510779		0.738938053097345	0.544878048780488		0.949227373068433	0.225741780272654
0.957345971563981	0.18407960199005		0.738938053097345	0.545365853658537		0.949227373068433	0.225942261427426
0.957345971563981	0.18424543946932		0.738938053097345	0.545853658536585		0.949227373068433	0.226142742582197
0.957345971563981	0.18441127694859		0.738938053097345	0.546341463414634		0.949227373068433	0.226343223736969
0.957345971563981	0.184577114427861		0.736725663716814	0.546341463414634		0.949227373068433	0.22654370489174
0.957345971563981	0.184742951907131		0.736725663716814	0.546829268292683		0.949227373068433	0.226744186046512
0.957345971563981	0.184908789386401		0.736725663716814	0.547317073170732		0.949227373068433	0.226944667201283
0.957345971563981	0.185074626865672		0.734513274336283	0.547317073170732		0.949227373068433	0.227145148356055
0.957345971563981	0.185240464344942		0.734513274336283	0.547804878048781		0.949227373068433	0.227345629510826
0.956668923493568	0.185240464344942		0.734513274336283	0.548292682926829		0.949227373068433	0.227546110665597
0.956668923493568	0.185406301824212		0.732300884955752	0.548292682926829		0.949227373068433	0.227746591820369
0.956668923493568	0.185572139303483		0.732300884955752	0.548780487804878		0.949227373068433	0.22794707297514
0.956668923493568	0.185737976782753		0.732300884955752	0.549268292682927		0.949227373068433	0.228147554129912
0.956668923493568	0.185903814262023		0.730088495575221	0.549268292682927		0.949227373068433	0.228348035284683
0.955991875423155	0.185903814262023		0.730088495575221	0.549756097560976		0.949227373068433	0.228548516439455
0.955991875423155	0.186069651741294		0.730088495575221	0.550243902439024		0.949227373068433	0.228748997594226
0.955991875423155	0.186235489220564		0.730088495575221	0.550731707317073		0.949227373068433	0.228949478748998
0.955991875423155	0.186401326699834		0.730088495575221	0.551219512195122		0.949227373068433	0.229149959903769
0.955991875423155	0.186567164179104		0.730088495575221	0.551707317073171		0.949227373068433	0.22935044105854
0.955314827352742	0.186567164179104		0.730088495575221	0.55219512195122		0.949227373068433	0.229550922213312
0.955314827352742	0.186733001658375		0.730088495575221	0.552682926829268		0.949227373068433	0.229751403368083
0.955314827352742	0.186898839137645		0.730088495575221	0.553170731707317		0.949227373068433	0.229951884522855
0.955314827352742	0.187064676616915		0.730088495575221	0.553658536585366		0.949227373068433	0.230152365677626
0.955314827352742	0.187230514096186		0.730088495575221	0.554146341463415		0.949227373068433	0.230352846832398
0.955314827352742	0.187396351575456		0.730088495575221	0.554634146341463		0.949227373068433	0.230553327987169
0.955314827352742	0.187562189054726		0.730088495575221	0.555121951219512		0.949227373068433	0.230753809141941
0.955314827352742	0.187728026533997		0.730088495575221	0.555609756097561		0.949227373068433	0.230954290296712
0.954637779282329	0.187728026533997		0.730088495575221	0.55609756097561		0.949227373068433	0.231154771451484
0.954637779282329	0.187893864013267		0.730088495575221	0.556585365853659		0.949227373068433	0.231355252606255
0.954637779282329	0.188059701492537		0.730088495575221	0.557073170731707		0.949227373068433	0.231555733761026
0.954637779282329	0.188225538971808		0.730088495575221	0.557560975609756		0.949227373068433	0.231756214915798
0.954637779282329	0.188391376451078		0.730088495575221	0.558048780487805		0.949227373068433	0.231956696070569
0.954637779282329	0.188557213930348		0.730088495575221	0.558536585365854		0.949227373068433	0.232157177225341
0.954637779282329	0.188723051409619		0.72787610619469	0.558536585365854		0.949227373068433	0.232357658380112
0.954637779282329	0.188888888888889		0.72787610619469	0.559024390243902		0.949227373068433	0.232558139534884
0.954637779282329	0.189054726368159		0.72787610619469	0.559512195121951		0.949227373068433	0.232758620689655
0.954637779282329	0.18922056384743		0.72787610619469	0.56		0.949227373068433	0.232959101844427
0.954637779282329	0.1893864013267		0.72787610619469	0.560487804878049		0.949227373068433	0.233159582999198
0.954637779282329	0.18955223880597		0.72787610619469	0.560975609756098		0.949227373068433	0.23336006415397
0.954637779282329	0.18971807628524		0.72787610619469	0.561463414634146		0.949227373068433	0.233560545308741
0.954637779282329	0.189883913764511		0.72787610619469	0.561951219512195		0.949227373068433	0.233761026463512
0.954637779282329	0.190049751243781		0.72787610619469	0.562439024390244		0.949227373068433	0.233961507618284
0.954637779282329	0.190215588723051		0.72787610619469	0.562926829268293		0.949227373068433	0.234161988773055
0.954637779282329	0.190381426202322		0.72787610619469	0.563414634146341		0.949227373068433	0.234362469927827
0.954637779282329	0.190547263681592		0.72787610619469	0.56390243902439		0.949227373068433	0.234562951082598
0.954637779282329	0.190713101160862		0.72787610619469	0.564390243902439		0.949227373068433	0.23476343223737
0.954637779282329	0.190878938640133		0.725663716814159	0.564390243902439		0.949227373068433	0.234963913392141
0.954637779282329	0.191044776119403		0.725663716814159	0.564878048780488		0.949227373068433	0.235164394546913
0.953960731211916	0.191044776119403		0.723451327433628	0.564878048780488		0.949227373068433	0.235364875701684
0.953960731211916	0.191210613598673		0.723451327433628	0.565365853658537		0.949227373068433	0.235565356856455
0.953960731211916	0.191376451077944		0.723451327433628	0.565853658536585		0.949227373068433	0.235765838011227
0.953960731211916	0.191542288557214		0.723451327433628	0.566341463414634		0.949227373068433	0.235966319165998
0.953960731211916	0.191708126036484		0.723451327433628	0.566829268292683		0.949227373068433	0.23616680032077
0.953283683141503	0.191708126036484		0.723451327433628	0.567317073170732		0.949227373068433	0.236367281475541
0.953283683141503	0.191873963515755		0.723451327433628	0.56780487804878		0.949227373068433	0.236567762630313
0.953283683141503	0.192039800995025		0.723451327433628	0.568780487804878		0.949227373068433	0.236768243785084
0.953283683141503	0.192205638474295		0.723451327433628	0.569268292682927		0.949227373068433	0.236968724939856
0.953283683141503	0.192371475953566		0.721238938053097	0.569268292682927		0.949227373068433	0.237169206094627
0.95260663507109	0.192371475953566		0.721238938053097	0.569756097560976		0.949227373068433	0.237369687249399
0.95260663507109	0.192537313432836		0.721238938053097	0.570243902439024		0.949227373068433	0.23757016840417
0.95260663507109	0.192703150912106		0.721238938053097	0.570731707317073		0.949227373068433	0.237770649558941
0.95260663507109	0.192868988391376		0.721238938053097	0.571219512195122		0.949227373068433	0.237971130713713
0.95260663507109	0.193034825870647		0.721238938053097	0.571707317073171		0.949227373068433	0.238171611868484
0.95260663507109	0.193200663349917		0.721238938053097	0.572195121951219		0.949227373068433	0.238372093023256
0.95260663507109	0.193366500829187		0.721238938053097	0.572682926829268		0.949227373068433	0.238572574178027
0.95260663507109	0.193532338308458		0.721238938053097	0.573170731707317		0.949227373068433	0.238773055332799
0.95260663507109	0.193698175787728		0.721238938053097	0.573658536585366		0.949227373068433	0.23897353648757
0.95260663507109	0.193864013266998		0.721238938053097	0.574146341463415		0.949227373068433	0.239174017642342
0.95260663507109	0.194029850746269		0.721238938053097	0.574634146341463		0.949227373068433	0.239374498797113
0.95260663507109	0.194195688225539		0.721238938053097	0.575121951219512		0.949227373068433	0.239574979951885
0.951929587000677	0.194195688225539		0.721238938053097	0.575609756097561		0.949227373068433	0.239775461106656
0.951252538930264	0.194195688225539		0.721238938053097	0.57609756097561		0.949227373068433	0.239975942261427
0.951252538930264	0.194361525704809		0.721238938053097	0.576585365853658		0.949227373068433	0.240176423416199
0.951252538930264	0.19452736318408		0.721238938053097	0.577073170731707		0.949227373068433	0.24037690457097
0.951252538930264	0.19469320066335		0.721238938053097	0.577560975609756		0.949227373068433	0.240577385725742
0.951252538930264	0.19485903814262		0.721238938053097	0.578048780487805		0.949227373068433	0.240777866880513
0.947190250507786	0.199170812603648		0.719026548672566	0.578048780487805		0.949227373068433	0.240978348035285
0.947190250507786	0.199336650082919		0.719026548672566	0.578536585365854		0.949227373068433	0.241178829190056
0.947190250507786	0.199502487562189		0.719026548672566	0.579024390243902		0.949227373068433	0.241379310344828
0.947190250507786	0.199668325041459		0.719026548672566	0.579512195121951		0.949227373068433	0.241579791499599
0.947190250507786	0.19983416252073		0.719026548672566	0.58		0.949227373068433	0.24178027265437
0.947190250507786	0.2		0.719026548672566	0.580487804878049		0.949227373068433	0.241980753809142
0.946513202437373	0.2		0.719026548672566	0.580975609756098		0.949227373068433	0.242181234963913
0.946513202437373	0.20016583747927		0.719026548672566	0.581463414634146		0.949227373068433	0.242381716118685
0.946513202437373	0.200331674958541		0.719026548672566	0.581951219512195		0.949227373068433	0.242582197273456
0.946513202437373	0.200497512437811		0.719026548672566	0.582439024390244		0.949227373068433	0.242782678428228
0.946513202437373	0.200663349917081		0.716814159292035	0.582439024390244		0.949227373068433	0.242983159582999
0.946513202437373	0.200829187396352		0.716814159292035	0.582926829268293		0.949227373068433	0.243183640737771
0.946513202437373	0.200995024875622		0.716814159292035	0.583414634146341		0.949227373068433	0.243384121892542
0.946513202437373	0.201160862354892		0.716814159292035	0.58390243902439		0.949227373068433	0.243584603047314
0.946513202437373	0.201326699834163		0.714601769911504	0.58390243902439		0.949227373068433	0.243785084202085
0.946513202437373	0.201492537313433		0.714601769911504	0.584390243902439		0.949227373068433	0.243985565356856
0.946513202437373	0.201658374792703		0.712389380530973	0.584390243902439		0.949227373068433	0.244186046511628
0.946513202437373	0.201824212271973		0.712389380530973	0.584878048780488		0.949227373068433	0.244386527666399
0.946513202437373	0.201990049751244		0.712389380530973	0.585365853658537		0.949227373068433	0.244587008821171
0.946513202437373	0.202155887230514		0.712389380530973	0.585853658536585		0.949227373068433	0.244787489975942
0.946513202437373	0.202321724709784		0.712389380530973	0.586341463414634		0.948123620309051	0.244787489975942
0.946513202437373	0.202487562189055		0.712389380530973	0.586829268292683		0.948123620309051	0.244987971130714
0.946513202437373	0.202653399668325		0.712389380530973	0.587317073170732		0.948123620309051	0.245188452285485
0.946513202437373	0.202819237147595		0.712389380530973	0.58780487804878		0.948123620309051	0.245388933440257
0.946513202437373	0.202985074626866		0.712389380530973	0.588292682926829		0.948123620309051	0.245589414595028
0.946513202437373	0.203150912106136		0.712389380530973	0.588780487804878		0.948123620309051	0.2457898957498
0.946513202437373	0.203316749585406		0.712389380530973	0.589268292682927		0.948123620309051	0.245990376904571
0.946513202437373	0.203482587064677		0.710176991150443	0.589268292682927		0.948123620309051	0.246190858059342
0.946513202437373	0.203648424543947		0.710176991150443	0.589756097560976		0.948123620309051	0.246391339214114
0.946513202437373	0.203814262023217		0.710176991150443	0.590243902439024		0.948123620309051	0.246591820368885
0.946513202437373	0.203980099502488		0.710176991150443	0.590731707317073		0.948123620309051	0.246792301523657
0.946513202437373	0.204145936981758		0.710176991150443	0.591219512195122		0.948123620309051	0.246992782678428
0.946513202437373	0.204311774461028		0.710176991150443	0.591707317073171		0.948123620309051	0.2471932638332
0.946513202437373	0.204477611940299		0.710176991150443	0.592195121951219		0.948123620309051	0.247393744987971
0.946513202437373	0.204643449419569		0.710176991150443	0.592682926829268		0.948123620309051	0.247594226142743
0.946513202437373	0.204809286898839		0.710176991150443	0.593170731707317		0.948123620309051	0.247794707297514
0.946513202437373	0.204975124378109		0.710176991150443	0.593658536585366		0.948123620309051	0.247995188452285
0.946513202437373	0.20514096185738		0.710176991150443	0.594146341463415		0.948123620309051	0.248195669607057
0.946513202437373	0.20530679933665		0.710176991150443	0.594634146341463		0.948123620309051	0.248396150761828
0.946513202437373	0.20547263681592		0.710176991150443	0.595121951219512		0.948123620309051	0.2485966319166
0.946513202437373	0.205638474295191		0.710176991150443	0.595609756097561		0.948123620309051	0.248797113071371
0.946513202437373	0.205804311774461		0.710176991150443	0.59609756097561		0.948123620309051	0.248997594226143
0.94583615436696	0.205804311774461		0.710176991150443	0.596585365853659		0.948123620309051	0.249198075380914
0.94583615436696	0.205970149253731		0.710176991150443	0.597073170731707		0.948123620309051	0.249398556535686
0.94583615436696	0.206135986733002		0.710176991150443	0.597560975609756		0.948123620309051	0.249599037690457
0.94583615436696	0.206301824212272		0.710176991150443	0.598048780487805		0.948123620309051	0.249799518845229
0.94583615436696	0.206467661691542		0.710176991150443	0.598536585365854		0.948123620309051	0.25
0.94583615436696	0.206633499170813		0.710176991150443	0.599024390243902		0.948123620309051	0.250200481154771
0.94583615436696	0.206799336650083		0.710176991150443	0.599512195121951		0.948123620309051	0.250400962309543
0.94583615436696	0.206965174129353		0.710176991150443	0.6		0.948123620309051	0.250601443464314
0.94583615436696	0.207131011608624		0.710176991150443	0.600487804878049		0.948123620309051	0.250801924619086
0.94583615436696	0.207296849087894		0.707964601769911	0.600487804878049		0.948123620309051	0.251002405773857
0.94583615436696	0.207462686567164		0.707964601769911	0.600975609756098		0.948123620309051	0.251202886928629
0.94583615436696	0.207628524046435		0.707964601769911	0.601463414634146		0.948123620309051	0.2514033680834
0.94583615436696	0.207794361525705		0.707964601769911	0.601951219512195		0.948123620309051	0.251603849238172
0.94583615436696	0.207960199004975		0.707964601769911	0.602439024390244		0.948123620309051	0.251804330392943
0.94583615436696	0.208126036484245		0.705752212389381	0.602439024390244		0.948123620309051	0.252004811547715
0.94583615436696	0.208291873963516		0.705752212389381	0.602926829268293		0.948123620309051	0.252205292702486
0.94583615436696	0.208457711442786		0.705752212389381	0.603414634146341		0.948123620309051	0.252405773857257
0.94583615436696	0.208623548922056		0.705752212389381	0.60390243902439		0.948123620309051	0.252606255012029
0.94583615436696	0.208789386401327		0.705752212389381	0.604390243902439		0.948123620309051	0.2528067361668
0.94583615436696	0.208955223880597		0.70353982300885	0.604390243902439		0.948123620309051	0.253007217321572
0.94583615436696	0.209121061359867		0.70353982300885	0.604878048780488		0.948123620309051	0.253207698476343
0.94583615436696	0.209286898839138		0.70353982300885	0.605365853658537		0.948123620309051	0.253408179631115
0.94583615436696	0.209452736318408		0.701327433628319	0.605365853658537		0.948123620309051	0.253608660785886
0.94583615436696	0.209618573797678		0.701327433628319	0.605853658536585		0.947019867549669	0.253608660785886
0.94583615436696	0.209784411276949		0.701327433628319	0.606341463414634		0.947019867549669	0.253809141940658
0.94583615436696	0.209950248756219		0.701327433628319	0.606829268292683		0.947019867549669	0.254009623095429
0.94583615436696	0.210116086235489		0.701327433628319	0.607317073170732		0.947019867549669	0.2542101042502
0.94583615436696	0.21028192371476		0.701327433628319	0.60780487804878		0.947019867549669	0.254410585404972
0.94583615436696	0.21044776119403		0.701327433628319	0.608292682926829		0.947019867549669	0.254611066559743
0.94583615436696	0.2106135986733		0.699115044247788	0.608292682926829		0.947019867549669	0.254811547714515
0.94583615436696	0.21077943615257		0.699115044247788	0.608780487804878		0.947019867549669	0.255012028869286
0.94583615436696	0.210945273631841		0.699115044247788	0.609268292682927		0.947019867549669	0.255212510024058
0.94583615436696	0.211111111111111		0.699115044247788	0.609756097560976		0.947019867549669	0.255412991178829
0.94583615436696	0.211276948590381		0.699115044247788	0.610243902439024		0.947019867549669	0.255613472333601
0.945159106296547	0.211276948590381		0.699115044247788	0.610731707317073		0.947019867549669	0.255813953488372
0.945159106296547	0.211442786069652		0.699115044247788	0.611219512195122		0.947019867549669	0.256014434643144
0.945159106296547	0.211608623548922		0.699115044247788	0.611707317073171		0.945916114790287	0.256014434643144
0.945159106296547	0.211774461028192		0.699115044247788	0.61219512195122		0.945916114790287	0.256214915797915
0.945159106296547	0.211940298507463		0.699115044247788	0.612682926829268		0.945916114790287	0.256415396952686
0.945159106296547	0.212106135986733		0.696902654867257	0.612682926829268		0.945916114790287	0.256615878107458
0.945159106296547	0.212271973466003		0.696902654867257	0.613170731707317		0.945916114790287	0.256816359262229
0.945159106296547	0.212437810945274		0.696902654867257	0.613658536585366		0.945916114790287	0.257016840417001
0.945159106296547	0.212603648424544		0.694690265486726	0.613658536585366		0.945916114790287	0.257217321571772
0.945159106296547	0.212769485903814		0.694690265486726	0.614146341463415		0.945916114790287	0.257417802726544
0.945159106296547	0.212935323383085		0.694690265486726	0.614634146341463		0.945916114790287	0.257618283881315
0.945159106296547	0.213101160862355		0.694690265486726	0.615121951219512		0.945916114790287	0.257818765036087
0.945159106296547	0.213266998341625		0.694690265486726	0.615609756097561		0.945916114790287	0.258019246190858
0.945159106296547	0.213432835820896		0.694690265486726	0.61609756097561		0.945916114790287	0.25821972734563
0.945159106296547	0.213598673300166		0.694690265486726	0.616585365853659		0.945916114790287	0.258420208500401
0.945159106296547	0.213764510779436		0.694690265486726	0.617073170731707		0.945916114790287	0.258620689655172
0.945159106296547	0.213930348258706		0.694690265486726	0.617560975609756		0.944812362030905	0.258620689655172
0.945159106296547	0.214096185737977		0.694690265486726	0.618048780487805		0.944812362030905	0.258821170809944
0.945159106296547	0.214262023217247		0.694690265486726	0.618536585365854		0.944812362030905	0.259021651964715
0.945159106296547	0.214427860696517		0.694690265486726	0.619512195121951		0.943708609271523	0.259021651964715
0.945159106296547	0.214593698175788		0.694690265486726	0.62		0.943708609271523	0.259222133119487
0.945159106296547	0.214759535655058		0.694690265486726	0.620487804878049		0.943708609271523	0.259422614274258
0.945159106296547	0.214925373134328		0.692477876106195	0.620487804878049		0.943708609271523	0.25962309542903
0.945159106296547	0.215091210613599		0.692477876106195	0.620975609756098		0.943708609271523	0.259823576583801
0.945159106296547	0.215257048092869		0.692477876106195	0.621463414634146		0.943708609271523	0.260024057738573
0.945159106296547	0.215422885572139		0.692477876106195	0.621951219512195		0.942604856512141	0.260024057738573
0.945159106296547	0.21558872305141		0.692477876106195	0.622439024390244		0.942604856512141	0.260224538893344
0.945159106296547	0.21575456053068		0.692477876106195	0.622926829268293		0.942604856512141	0.260425020048115
0.945159106296547	0.21592039800995		0.692477876106195	0.623414634146341		0.942604856512141	0.260625501202887
0.945159106296547	0.216086235489221		0.692477876106195	0.62390243902439		0.942604856512141	0.260825982357658
0.945159106296547	0.216252072968491		0.690265486725664	0.62390243902439		0.942604856512141	0.26102646351243
0.945159106296547	0.216417910447761		0.690265486725664	0.624390243902439		0.942604856512141	0.261226944667201
0.945159106296547	0.216583747927032		0.690265486725664	0.624878048780488		0.941501103752759	0.261226944667201
0.945159106296547	0.216749585406302		0.690265486725664	0.625365853658537		0.941501103752759	0.261427425821973
0.945159106296547	0.216915422885572		0.690265486725664	0.625853658536585		0.941501103752759	0.261627906976744
0.945159106296547	0.217081260364842		0.688053097345133	0.625853658536585		0.941501103752759	0.261828388131516
0.945159106296547	0.217247097844113		0.688053097345133	0.626341463414634		0.941501103752759	0.262028869286287
0.945159106296547	0.217412935323383		0.688053097345133	0.626829268292683		0.941501103752759	0.262229350441059
0.945159106296547	0.217578772802653		0.688053097345133	0.627317073170732		0.941501103752759	0.26242983159583
0.945159106296547	0.217744610281924		0.688053097345133	0.62780487804878		0.941501103752759	0.262630312750601
0.945159106296547	0.217910447761194		0.685840707964602	0.62780487804878		0.941501103752759	0.262830793905373
0.945159106296547	0.218076285240464		0.685840707964602	0.628292682926829		0.940397350993378	0.262830793905373
0.945159106296547	0.218242122719735		0.685840707964602	0.628780487804878		0.940397350993378	0.263031275060144
0.945159106296547	0.218407960199005		0.685840707964602	0.629268292682927		0.940397350993378	0.263231756214916
0.945159106296547	0.218573797678275		0.685840707964602	0.629756097560976		0.940397350993378	0.263432237369687
0.945159106296547	0.218739635157546		0.685840707964602	0.630243902439024		0.940397350993378	0.263632718524459
0.945159106296547	0.218905472636816		0.683628318584071	0.630243902439024		0.940397350993378	0.26383319967923
0.944482058226134	0.218905472636816		0.683628318584071	0.630731707317073		0.940397350993378	0.264033680834002
0.944482058226134	0.219071310116086		0.68141592920354	0.630731707317073		0.940397350993378	0.264234161988773
0.944482058226134	0.219237147595357		0.68141592920354	0.631219512195122		0.940397350993378	0.264434643143545
0.944482058226134	0.219402985074627		0.679203539823009	0.631219512195122		0.940397350993378	0.264635124298316
0.944482058226134	0.219568822553897		0.679203539823009	0.631707317073171		0.940397350993378	0.264835605453087
0.944482058226134	0.219734660033167		0.679203539823009	0.63219512195122		0.940397350993378	0.265036086607859
0.943805010155721	0.219734660033167		0.679203539823009	0.632682926829268		0.940397350993378	0.26523656776263
0.943805010155721	0.219900497512438		0.679203539823009	0.633170731707317		0.940397350993378	0.265437048917402
0.943805010155721	0.220066334991708		0.679203539823009	0.633658536585366		0.940397350993378	0.265637530072173
0.943805010155721	0.220232172470978		0.679203539823009	0.634146341463415		0.940397350993378	0.265838011226945
0.943805010155721	0.220398009950249		0.679203539823009	0.634634146341463		0.940397350993378	0.266038492381716
0.943805010155721	0.220563847429519		0.679203539823009	0.635121951219512		0.940397350993378	0.266238973536488
0.943805010155721	0.220729684908789		0.679203539823009	0.635609756097561		0.940397350993378	0.266439454691259
0.943127962085308	0.220729684908789		0.676991150442478	0.635609756097561		0.940397350993378	0.26663993584603
0.943127962085308	0.22089552238806		0.674778761061947	0.635609756097561		0.939293598233996	0.26663993584603
0.943127962085308	0.22106135986733		0.674778761061947	0.63609756097561		0.939293598233996	0.266840417000802
0.943127962085308	0.2212271973466		0.674778761061947	0.636585365853659		0.939293598233996	0.267040898155573
0.943127962085308	0.221393034825871		0.674778761061947	0.637073170731707		0.939293598233996	0.267241379310345
0.943127962085308	0.221558872305141		0.674778761061947	0.637560975609756		0.939293598233996	0.267441860465116
0.942450914014895	0.221558872305141		0.674778761061947	0.638048780487805		0.939293598233996	0.267642341619888
0.942450914014895	0.221724709784411		0.674778761061947	0.638536585365854		0.939293598233996	0.267842822774659
0.941773865944482	0.221724709784411		0.672566371681416	0.638536585365854		0.939293598233996	0.268043303929431
0.941773865944482	0.221890547263682		0.670353982300885	0.638536585365854		0.939293598233996	0.268243785084202
0.941773865944482	0.222056384742952		0.670353982300885	0.639024390243902		0.939293598233996	0.268444266238974
0.941773865944482	0.222222222222222		0.670353982300885	0.639512195121951		0.939293598233996	0.268644747393745
0.941773865944482	0.222388059701493		0.668141592920354	0.639512195121951		0.939293598233996	0.268845228548516
0.941773865944482	0.222553897180763		0.668141592920354	0.64		0.939293598233996	0.269045709703288
0.941773865944482	0.222719734660033		0.668141592920354	0.640487804878049		0.939293598233996	0.269246190858059
0.941773865944482	0.222885572139303		0.668141592920354	0.640975609756098		0.939293598233996	0.269446672012831
0.941773865944482	0.223051409618574		0.668141592920354	0.641463414634146		0.939293598233996	0.269647153167602
0.941773865944482	0.223217247097844		0.668141592920354	0.641951219512195		0.939293598233996	0.269847634322374
0.941773865944482	0.223383084577114		0.668141592920354	0.642439024390244		0.939293598233996	0.270048115477145
0.941773865944482	0.223548922056385		0.668141592920354	0.642926829268293		0.938189845474614	0.270048115477145
0.941096817874069	0.223548922056385		0.668141592920354	0.643414634146341		0.938189845474614	0.270248596631917
0.941096817874069	0.223714759535655		0.668141592920354	0.64390243902439		0.938189845474614	0.270449077786688
0.941096817874069	0.223880597014925		0.665929203539823	0.64390243902439		0.938189845474614	0.270649558941459
0.941096817874069	0.224046434494196		0.663716814159292	0.64390243902439		0.938189845474614	0.270850040096231
0.941096817874069	0.224212271973466		0.663716814159292	0.644390243902439		0.938189845474614	0.271050521251002
0.941096817874069	0.224378109452736		0.663716814159292	0.644878048780488		0.938189845474614	0.271251002405774
0.940419769803656	0.224378109452736		0.661504424778761	0.644878048780488		0.938189845474614	0.271451483560545
0.940419769803656	0.224543946932007		0.661504424778761	0.645365853658537		0.938189845474614	0.271651964715317
0.940419769803656	0.224709784411277		0.661504424778761	0.645853658536585		0.938189845474614	0.271852445870088
0.940419769803656	0.224875621890547		0.65929203539823	0.645853658536585		0.938189845474614	0.27205292702486
0.940419769803656	0.225041459369818		0.657079646017699	0.645853658536585		0.938189845474614	0.272253408179631
0.940419769803656	0.225207296849088		0.657079646017699	0.646341463414634		0.938189845474614	0.272453889334403
0.940419769803656	0.225373134328358		0.654867256637168	0.646341463414634		0.938189845474614	0.272654370489174
0.940419769803656	0.225538971807629		0.654867256637168	0.646829268292683		0.938189845474614	0.272854851643945
0.940419769803656	0.225704809286899		0.654867256637168	0.647317073170732		0.938189845474614	0.273055332798717
0.940419769803656	0.225870646766169		0.654867256637168	0.647804878048781		0.938189845474614	0.273255813953488
0.940419769803656	0.226036484245439		0.654867256637168	0.648292682926829		0.938189845474614	0.27345629510826
0.940419769803656	0.22620232172471		0.654867256637168	0.648780487804878		0.938189845474614	0.273656776263031
0.940419769803656	0.22636815920398		0.654867256637168	0.649268292682927		0.937086092715232	0.273656776263031
0.940419769803656	0.22653399668325		0.654867256637168	0.649756097560976		0.937086092715232	0.273857257417803
0.940419769803656	0.226699834162521		0.654867256637168	0.650243902439024		0.937086092715232	0.274057738572574
0.940419769803656	0.226865671641791		0.654867256637168	0.650731707317073		0.937086092715232	0.274258219727346
0.940419769803656	0.227031509121061		0.654867256637168	0.651219512195122		0.937086092715232	0.274458700882117
0.940419769803656	0.227197346600332		0.654867256637168	0.651707317073171		0.937086092715232	0.274659182036889
0.940419769803656	0.227363184079602		0.654867256637168	0.65219512195122		0.937086092715232	0.27485966319166
0.940419769803656	0.227529021558872		0.652654867256637	0.65219512195122		0.937086092715232	0.275060144346431
0.940419769803656	0.227694859038143		0.652654867256637	0.652682926829268		0.937086092715232	0.275260625501203
0.939742721733243	0.227694859038143		0.652654867256637	0.653170731707317		0.937086092715232	0.275461106655974
0.939742721733243	0.227860696517413		0.652654867256637	0.653658536585366		0.937086092715232	0.275661587810746
0.939742721733243	0.228026533996683		0.650442477876106	0.653658536585366		0.937086092715232	0.275862068965517
0.939742721733243	0.228192371475954		0.650442477876106	0.654146341463415		0.937086092715232	0.276062550120289
0.939742721733243	0.228358208955224		0.650442477876106	0.654634146341463		0.937086092715232	0.27626303127506
0.939742721733243	0.228524046434494		0.650442477876106	0.655121951219512		0.937086092715232	0.276463512429832
0.939742721733243	0.228689883913765		0.650442477876106	0.655609756097561		0.937086092715232	0.276663993584603
0.939742721733243	0.228855721393035		0.650442477876106	0.65609756097561		0.937086092715232	0.276864474739374
0.939742721733243	0.229021558872305		0.648230088495575	0.65609756097561		0.937086092715232	0.277064955894146
0.939742721733243	0.229187396351575		0.648230088495575	0.656585365853659		0.937086092715232	0.277265437048917
0.93906567366283	0.229187396351575		0.648230088495575	0.657073170731707		0.937086092715232	0.277465918203689
0.93906567366283	0.229353233830846		0.648230088495575	0.657560975609756		0.937086092715232	0.27766639935846
0.93906567366283	0.229519071310116		0.646017699115044	0.657560975609756		0.937086092715232	0.277866880513232
0.93906567366283	0.229684908789386		0.646017699115044	0.658048780487805		0.937086092715232	0.278067361668003
0.93906567366283	0.229850746268657		0.646017699115044	0.658536585365854		0.937086092715232	0.278267842822775
0.938388625592417	0.229850746268657		0.646017699115044	0.659024390243902		0.937086092715232	0.278468323977546
0.938388625592417	0.230016583747927		0.646017699115044	0.659512195121951		0.93598233995585	0.278468323977546
0.938388625592417	0.230182421227197		0.646017699115044	0.66		0.93598233995585	0.278668805132318
0.938388625592417	0.230348258706468		0.643805309734513	0.66		0.93598233995585	0.278869286287089
0.938388625592417	0.230514096185738		0.643805309734513	0.660487804878049		0.93598233995585	0.27906976744186
0.938388625592417	0.230679933665008		0.641592920353982	0.660487804878049		0.93598233995585	0.279270248596632
0.937711577522004	0.230679933665008		0.641592920353982	0.660975609756098		0.93598233995585	0.279470729751403
0.937711577522004	0.230845771144279		0.641592920353982	0.661463414634146		0.93598233995585	0.279671210906175
0.937711577522004	0.231011608623549		0.641592920353982	0.661951219512195		0.93598233995585	0.279871692060946
0.937711577522004	0.231177446102819		0.641592920353982	0.662439024390244		0.93598233995585	0.280072173215718
0.937711577522004	0.23134328358209		0.641592920353982	0.662926829268293		0.93598233995585	0.280272654370489
0.937711577522004	0.23150912106136		0.639380530973451	0.662926829268293		0.93598233995585	0.280473135525261
0.937711577522004	0.23167495854063		0.639380530973451	0.663414634146341		0.93598233995585	0.280673616680032
0.937711577522004	0.2318407960199		0.63716814159292	0.663414634146341		0.93598233995585	0.280874097834804
0.937034529451591	0.2318407960199		0.634955752212389	0.663414634146341		0.93598233995585	0.281074578989575
0.937034529451591	0.232006633499171		0.634955752212389	0.66390243902439		0.93598233995585	0.281275060144346
0.937034529451591	0.232172470978441		0.634955752212389	0.664390243902439		0.93598233995585	0.281475541299118
0.936357481381178	0.232172470978441		0.634955752212389	0.664878048780488		0.93598233995585	0.281676022453889
0.936357481381178	0.232338308457711		0.634955752212389	0.665365853658537		0.93598233995585	0.281876503608661
0.936357481381178	0.232504145936982		0.632743362831858	0.665365853658537		0.93598233995585	0.282076984763432
0.936357481381178	0.232669983416252		0.632743362831858	0.665853658536585		0.93598233995585	0.282277465918204
0.936357481381178	0.232835820895522		0.632743362831858	0.666341463414634		0.93598233995585	0.282477947072975
0.936357481381178	0.233001658374793		0.630530973451327	0.666341463414634		0.93598233995585	0.282678428227747
0.936357481381178	0.233167495854063		0.630530973451327	0.666829268292683		0.93598233995585	0.282878909382518
0.936357481381178	0.233333333333333		0.630530973451327	0.667317073170732		0.93598233995585	0.283079390537289
0.936357481381178	0.233499170812604		0.630530973451327	0.667804878048781		0.934878587196468	0.283079390537289
0.936357481381178	0.233665008291874		0.630530973451327	0.668292682926829		0.934878587196468	0.283279871692061
0.936357481381178	0.233830845771144		0.628318584070796	0.668292682926829		0.934878587196468	0.283480352846832
0.936357481381178	0.233996683250415		0.628318584070796	0.668780487804878		0.933774834437086	0.283480352846832
0.936357481381178	0.234162520729685		0.628318584070796	0.669268292682927		0.933774834437086	0.283680834001604
0.935680433310765	0.234162520729685		0.628318584070796	0.669756097560976		0.933774834437086	0.283881315156375
0.935680433310765	0.234328358208955		0.628318584070796	0.670243902439024		0.933774834437086	0.284081796311147
0.935680433310765	0.234494195688226		0.628318584070796	0.670731707317073		0.933774834437086	0.284282277465918
0.935680433310765	0.234660033167496		0.628318584070796	0.671219512195122		0.933774834437086	0.28448275862069
0.935003385240352	0.234660033167496		0.626106194690266	0.671219512195122		0.933774834437086	0.284683239775461
0.935003385240352	0.234825870646766		0.626106194690266	0.671707317073171		0.933774834437086	0.284883720930233
0.935003385240352	0.234991708126036		0.626106194690266	0.67219512195122		0.933774834437086	0.285084202085004
0.935003385240352	0.235157545605307		0.626106194690266	0.672682926829268		0.933774834437086	0.285284683239775
0.935003385240352	0.235323383084577		0.623893805309734	0.672682926829268		0.933774834437086	0.285485164394547
0.935003385240352	0.235489220563847		0.623893805309734	0.673170731707317		0.933774834437086	0.285685645549318
0.935003385240352	0.235655058043118		0.623893805309734	0.673658536585366		0.933774834437086	0.28588612670409
0.935003385240352	0.235820895522388		0.623893805309734	0.674146341463415		0.933774834437086	0.286086607858861
0.935003385240352	0.235986733001658		0.623893805309734	0.674634146341463		0.932671081677704	0.286086607858861
0.935003385240352	0.236152570480929		0.623893805309734	0.675121951219512		0.932671081677704	0.286287089013633
0.935003385240352	0.236318407960199		0.623893805309734	0.675609756097561		0.932671081677704	0.286487570168404
0.934326337169939	0.236318407960199		0.621681415929204	0.675609756097561		0.932671081677704	0.286688051323176
0.934326337169939	0.236484245439469		0.621681415929204	0.67609756097561		0.932671081677704	0.286888532477947
0.934326337169939	0.23665008291874		0.619469026548673	0.67609756097561		0.932671081677704	0.287089013632719
0.934326337169939	0.23681592039801		0.619469026548673	0.676585365853659		0.932671081677704	0.28728949478749
0.934326337169939	0.23698175787728		0.619469026548673	0.677073170731707		0.932671081677704	0.287489975942261
0.934326337169939	0.237147595356551		0.619469026548673	0.677560975609756		0.932671081677704	0.287690457097033
0.934326337169939	0.237313432835821		0.619469026548673	0.678048780487805		0.932671081677704	0.287890938251804
0.934326337169939	0.237479270315091		0.619469026548673	0.678536585365854		0.932671081677704	0.288091419406576
0.934326337169939	0.237645107794362		0.619469026548673	0.679024390243902		0.932671081677704	0.288291900561347
0.934326337169939	0.237810945273632		0.619469026548673	0.679512195121951		0.932671081677704	0.288492381716119
0.934326337169939	0.237976782752902		0.619469026548673	0.68		0.932671081677704	0.28869286287089
0.934326337169939	0.238142620232172		0.619469026548673	0.680487804878049		0.932671081677704	0.288893344025662
0.934326337169939	0.238308457711443		0.619469026548673	0.680975609756098		0.932671081677704	0.289093825180433
0.933649289099526	0.238308457711443		0.619469026548673	0.681463414634146		0.932671081677704	0.289294306335204
0.933649289099526	0.238474295190713		0.617256637168142	0.681463414634146		0.932671081677704	0.289494787489976
0.933649289099526	0.238640132669983		0.615044247787611	0.681463414634146		0.932671081677704	0.289695268644747
0.933649289099526	0.238805970149254		0.615044247787611	0.681951219512195		0.932671081677704	0.289895749799519
0.933649289099526	0.238971807628524		0.615044247787611	0.682439024390244		0.932671081677704	0.29009623095429
0.932972241029113	0.238971807628524		0.615044247787611	0.682926829268293		0.932671081677704	0.290296712109062
0.9322951929587	0.238971807628524		0.615044247787611	0.683414634146342		0.932671081677704	0.290497193263833
0.9322951929587	0.239137645107794		0.61283185840708	0.683414634146342		0.932671081677704	0.290697674418605
0.9322951929587	0.239303482587065		0.61283185840708	0.68390243902439		0.932671081677704	0.290898155573376
0.9322951929587	0.239469320066335		0.61283185840708	0.684390243902439		0.932671081677704	0.291098636728148
0.9322951929587	0.239635157545605		0.61283185840708	0.684878048780488		0.932671081677704	0.291299117882919
0.9322951929587	0.239800995024876		0.61283185840708	0.685365853658537		0.932671081677704	0.29149959903769
0.9322951929587	0.239966832504146		0.61283185840708	0.685853658536585		0.932671081677704	0.291700080192462
0.9322951929587	0.240132669983416		0.61283185840708	0.686341463414634		0.932671081677704	0.291900561347233
0.931618144888287	0.240132669983416		0.61283185840708	0.686829268292683		0.932671081677704	0.292101042502005
0.931618144888287	0.240298507462687		0.61283185840708	0.687317073170732		0.931567328918322	0.292101042502005
0.931618144888287	0.240464344941957		0.61283185840708	0.68780487804878		0.931567328918322	0.292301523656776
0.931618144888287	0.240630182421227		0.61283185840708	0.688292682926829		0.931567328918322	0.292502004811548
0.931618144888287	0.240796019900498		0.610619469026549	0.688292682926829		0.931567328918322	0.292702485966319
0.931618144888287	0.240961857379768		0.610619469026549	0.688780487804878		0.931567328918322	0.292902967121091
0.931618144888287	0.241127694859038		0.608407079646018	0.688780487804878		0.931567328918322	0.293103448275862
0.930941096817874	0.241127694859038		0.608407079646018	0.689268292682927		0.931567328918322	0.293303929430634
0.930941096817874	0.241293532338308		0.608407079646018	0.689756097560976		0.931567328918322	0.293504410585405
0.930941096817874	0.241459369817579		0.608407079646018	0.690243902439024		0.931567328918322	0.293704891740176
0.930941096817874	0.241625207296849		0.606194690265487	0.690243902439024		0.931567328918322	0.293905372894948
0.930941096817874	0.241791044776119		0.606194690265487	0.690731707317073		0.931567328918322	0.294105854049719
0.930941096817874	0.24195688225539		0.606194690265487	0.691219512195122		0.931567328918322	0.294306335204491
0.930941096817874	0.24212271973466		0.606194690265487	0.691707317073171		0.931567328918322	0.294506816359262
0.930941096817874	0.24228855721393		0.606194690265487	0.692195121951219		0.931567328918322	0.294707297514034
0.930941096817874	0.242454394693201		0.606194690265487	0.692682926829268		0.931567328918322	0.294907778668805
0.930941096817874	0.242620232172471		0.606194690265487	0.693170731707317		0.931567328918322	0.295108259823577
0.930941096817874	0.242786069651741		0.606194690265487	0.693658536585366		0.93046357615894	0.295108259823577
0.930941096817874	0.242951907131012		0.606194690265487	0.694146341463415		0.93046357615894	0.295308740978348
0.930941096817874	0.243117744610282		0.603982300884956	0.694146341463415		0.93046357615894	0.295509222133119
0.930941096817874	0.243283582089552		0.603982300884956	0.694634146341463		0.93046357615894	0.295709703287891
0.930941096817874	0.243449419568823		0.601769911504425	0.694634146341463		0.93046357615894	0.295910184442662
0.930941096817874	0.243615257048093		0.601769911504425	0.695121951219512		0.93046357615894	0.296110665597434
0.930941096817874	0.243781094527363		0.601769911504425	0.695609756097561		0.93046357615894	0.296311146752205
0.930941096817874	0.243946932006634		0.601769911504425	0.69609756097561		0.93046357615894	0.296511627906977
0.930941096817874	0.244112769485904		0.601769911504425	0.696585365853658		0.93046357615894	0.296712109061748
0.930941096817874	0.244278606965174		0.601769911504425	0.697073170731707		0.93046357615894	0.29691259021652
0.930941096817874	0.244444444444444		0.601769911504425	0.697560975609756		0.93046357615894	0.297113071371291
0.930941096817874	0.244610281923715		0.601769911504425	0.698048780487805		0.93046357615894	0.297313552526063
0.930264048747461	0.244610281923715		0.601769911504425	0.698536585365854		0.93046357615894	0.297514033680834
0.930264048747461	0.244776119402985		0.601769911504425	0.699024390243902		0.93046357615894	0.297714514835605
0.930264048747461	0.244941956882255		0.601769911504425	0.699512195121951		0.93046357615894	0.297914995990377
0.930264048747461	0.245107794361526		0.601769911504425	0.7		0.929359823399558	0.297914995990377
0.930264048747461	0.245273631840796		0.601769911504425	0.700487804878049		0.929359823399558	0.298115477145148
0.930264048747461	0.245439469320066		0.601769911504425	0.700975609756098		0.929359823399558	0.29831595829992
0.929587000677048	0.245439469320066		0.599557522123894	0.700975609756098		0.929359823399558	0.298516439454691
0.929587000677048	0.245605306799337		0.599557522123894	0.701463414634146		0.929359823399558	0.298716920609463
0.929587000677048	0.245771144278607		0.599557522123894	0.701951219512195		0.929359823399558	0.298917401764234
0.929587000677048	0.245936981757877		0.599557522123894	0.702439024390244		0.929359823399558	0.299117882919006
0.929587000677048	0.246102819237148		0.599557522123894	0.702926829268293		0.929359823399558	0.299318364073777
0.929587000677048	0.246268656716418		0.599557522123894	0.703414634146341		0.928256070640177	0.299318364073777
0.929587000677048	0.246434494195688		0.599557522123894	0.70390243902439		0.928256070640177	0.299518845228548
0.929587000677048	0.246600331674959		0.599557522123894	0.704390243902439		0.928256070640177	0.29971932638332
0.929587000677048	0.246766169154229		0.599557522123894	0.704878048780488		0.928256070640177	0.299919807538091
0.928909952606635	0.246766169154229		0.597345132743363	0.704878048780488		0.928256070640177	0.300120288692863
0.928909952606635	0.246932006633499		0.595132743362832	0.704878048780488		0.928256070640177	0.300320769847634
0.928909952606635	0.247097844112769		0.595132743362832	0.705365853658537		0.928256070640177	0.300521251002406
0.928909952606635	0.24726368159204		0.595132743362832	0.705853658536585		0.928256070640177	0.300721732157177
0.928909952606635	0.24742951907131		0.595132743362832	0.706341463414634		0.928256070640177	0.300922213311949
0.928909952606635	0.24759535655058		0.595132743362832	0.706829268292683		0.928256070640177	0.30112269446672
0.928909952606635	0.247761194029851		0.595132743362832	0.707317073170732		0.928256070640177	0.301323175621492
0.928909952606635	0.247927031509121		0.595132743362832	0.70780487804878		0.928256070640177	0.301523656776263
0.928232904536222	0.25240464344942		0.595132743362832	0.708292682926829		0.928256070640177	0.301724137931034
0.928232904536222	0.25257048092869		0.595132743362832	0.708780487804878		0.928256070640177	0.301924619085806
0.928232904536222	0.25273631840796		0.595132743362832	0.709268292682927		0.928256070640177	0.302125100240577
0.928232904536222	0.252902155887231		0.595132743362832	0.709756097560976		0.928256070640177	0.302325581395349
0.928232904536222	0.253067993366501		0.595132743362832	0.710243902439024		0.928256070640177	0.30252606255012
0.928232904536222	0.253233830845771		0.595132743362832	0.710731707317073		0.927152317880795	0.30252606255012
0.928232904536222	0.253399668325041		0.595132743362832	0.711219512195122		0.927152317880795	0.302726543704892
0.928232904536222	0.253565505804312		0.595132743362832	0.711707317073171		0.927152317880795	0.302927024859663
0.928232904536222	0.253731343283582		0.592920353982301	0.711707317073171		0.927152317880795	0.303127506014435
0.928232904536222	0.253897180762852		0.592920353982301	0.712195121951219		0.927152317880795	0.303327987169206
0.928232904536222	0.254063018242123		0.592920353982301	0.712682926829268		0.927152317880795	0.303528468323978
0.928232904536222	0.254228855721393		0.592920353982301	0.713170731707317		0.927152317880795	0.303728949478749
0.928232904536222	0.254394693200663		0.592920353982301	0.713658536585366		0.927152317880795	0.30392943063352
0.928232904536222	0.254560530679934		0.592920353982301	0.714146341463415		0.927152317880795	0.304129911788292
0.928232904536222	0.254726368159204		0.592920353982301	0.714634146341463		0.927152317880795	0.304330392943063
0.927555856465809	0.254726368159204		0.592920353982301	0.715121951219512		0.927152317880795	0.304530874097835
0.927555856465809	0.254892205638474		0.592920353982301	0.715609756097561		0.927152317880795	0.304731355252606
0.926878808395396	0.254892205638474		0.59070796460177	0.715609756097561		0.927152317880795	0.304931836407378
0.926878808395396	0.255058043117745		0.59070796460177	0.71609756097561		0.927152317880795	0.305132317562149
0.926878808395396	0.255223880597015		0.59070796460177	0.716585365853659		0.927152317880795	0.305332798716921
0.926878808395396	0.255389718076285		0.588495575221239	0.716585365853659		0.927152317880795	0.305533279871692
0.926201760324983	0.255389718076285		0.588495575221239	0.717073170731707		0.927152317880795	0.305733761026463
0.926201760324983	0.255555555555556		0.588495575221239	0.717560975609756		0.926048565121413	0.305733761026463
0.926201760324983	0.255721393034826		0.586283185840708	0.717560975609756		0.924944812362031	0.305733761026463
0.92552471225457	0.255721393034826		0.584070796460177	0.717560975609756		0.924944812362031	0.305934242181235
0.924847664184157	0.255721393034826		0.584070796460177	0.718048780487805		0.924944812362031	0.306134723336006
0.924847664184157	0.255887230514096		0.584070796460177	0.718536585365854		0.923841059602649	0.306134723336006
0.924847664184157	0.256053067993367		0.584070796460177	0.719024390243902		0.923841059602649	0.306335204490778
0.924170616113744	0.256053067993367		0.584070796460177	0.719512195121951		0.923841059602649	0.306535685645549
0.924170616113744	0.256218905472637		0.584070796460177	0.72		0.923841059602649	0.306736166800321
0.924170616113744	0.256384742951907		0.584070796460177	0.720487804878049		0.923841059602649	0.306936647955092
0.924170616113744	0.256550580431177		0.584070796460177	0.720975609756098		0.923841059602649	0.307137129109864
0.924170616113744	0.256716417910448		0.584070796460177	0.721463414634146		0.923841059602649	0.307337610264635
0.924170616113744	0.256882255389718		0.584070796460177	0.721951219512195		0.923841059602649	0.307538091419407
0.923493568043331	0.256882255389718		0.584070796460177	0.722439024390244		0.923841059602649	0.307738572574178
0.923493568043331	0.257048092868988		0.584070796460177	0.722926829268293		0.923841059602649	0.307939053728949
0.923493568043331	0.257213930348259		0.581858407079646	0.722926829268293		0.923841059602649	0.308139534883721
0.923493568043331	0.257379767827529		0.581858407079646	0.723414634146341		0.923841059602649	0.308340016038492
0.923493568043331	0.257545605306799		0.581858407079646	0.72390243902439		0.923841059602649	0.308540497193264
0.923493568043331	0.25771144278607		0.581858407079646	0.724390243902439		0.923841059602649	0.308740978348035
0.923493568043331	0.25787728026534		0.581858407079646	0.724878048780488		0.922737306843267	0.308740978348035
0.923493568043331	0.25804311774461		0.581858407079646	0.725365853658537		0.922737306843267	0.308941459502807
0.923493568043331	0.258208955223881		0.581858407079646	0.725853658536585		0.922737306843267	0.309141940657578
0.923493568043331	0.258374792703151		0.579646017699115	0.725853658536585		0.922737306843267	0.30934242181235
0.923493568043331	0.258540630182421		0.579646017699115	0.726341463414634		0.922737306843267	0.309542902967121
0.923493568043331	0.258706467661692		0.579646017699115	0.726829268292683		0.922737306843267	0.309743384121893
0.923493568043331	0.258872305140962		0.579646017699115	0.727317073170732		0.922737306843267	0.309943865276664
0.923493568043331	0.259038142620232		0.579646017699115	0.72780487804878		0.922737306843267	0.310144346431435
0.923493568043331	0.259203980099502		0.579646017699115	0.728292682926829		0.922737306843267	0.310344827586207
0.923493568043331	0.259369817578773		0.577433628318584	0.728292682926829		0.922737306843267	0.310545308740978
0.923493568043331	0.259535655058043		0.575221238938053	0.728292682926829		0.922737306843267	0.31074578989575
0.923493568043331	0.259701492537313		0.575221238938053	0.728780487804878		0.921633554083885	0.31074578989575
0.923493568043331	0.259867330016584		0.575221238938053	0.729268292682927		0.921633554083885	0.310946271050521
0.923493568043331	0.260033167495854		0.573008849557522	0.729268292682927		0.921633554083885	0.311146752205293
0.923493568043331	0.260199004975124		0.573008849557522	0.729756097560976		0.921633554083885	0.311347233360064
0.923493568043331	0.260364842454395		0.573008849557522	0.730243902439024		0.921633554083885	0.311547714514836
0.923493568043331	0.260530679933665		0.573008849557522	0.730731707317073		0.921633554083885	0.311748195669607
0.923493568043331	0.262354892205638		0.573008849557522	0.731219512195122		0.921633554083885	0.311948676824378
0.923493568043331	0.262520729684909		0.573008849557522	0.731707317073171		0.921633554083885	0.31214915797915
0.923493568043331	0.262686567164179		0.573008849557522	0.732195121951219		0.921633554083885	0.312349639133921
0.923493568043331	0.262852404643449		0.570796460176991	0.732195121951219		0.921633554083885	0.312550120288693
0.923493568043331	0.26301824212272		0.570796460176991	0.732682926829268		0.921633554083885	0.312750601443464
0.923493568043331	0.26318407960199		0.570796460176991	0.733170731707317		0.921633554083885	0.312951082598236
0.923493568043331	0.26334991708126		0.570796460176991	0.733658536585366		0.920529801324503	0.312951082598236
0.923493568043331	0.263515754560531		0.570796460176991	0.734146341463415		0.920529801324503	0.313151563753007
0.923493568043331	0.263681592039801		0.570796460176991	0.734634146341463		0.920529801324503	0.313352044907779
0.922816519972918	0.263681592039801		0.570796460176991	0.735121951219512		0.920529801324503	0.31355252606255
0.922816519972918	0.263847429519071		0.570796460176991	0.735609756097561		0.919426048565121	0.31355252606255
0.922816519972918	0.264013266998342		0.570796460176991	0.73609756097561		0.919426048565121	0.313753007217322
0.922816519972918	0.264179104477612		0.570796460176991	0.736585365853659		0.919426048565121	0.313953488372093
0.922816519972918	0.264344941956882		0.570796460176991	0.737073170731707		0.919426048565121	0.314153969526864
0.922139471902505	0.264344941956882		0.56858407079646	0.737073170731707		0.919426048565121	0.314354450681636
0.922139471902505	0.264510779436153		0.566371681415929	0.737073170731707		0.919426048565121	0.314554931836407
0.922139471902505	0.264676616915423		0.566371681415929	0.737560975609756		0.919426048565121	0.314755412991179
0.922139471902505	0.264842454394693		0.566371681415929	0.738048780487805		0.919426048565121	0.31495589414595
0.922139471902505	0.265008291873964		0.566371681415929	0.738536585365854		0.919426048565121	0.315156375300722
0.922139471902505	0.265174129353234		0.566371681415929	0.739024390243902		0.919426048565121	0.315356856455493
0.922139471902505	0.265339966832504		0.564159292035398	0.739024390243902		0.919426048565121	0.315557337610265
0.922139471902505	0.265505804311774		0.564159292035398	0.739512195121951		0.919426048565121	0.315757818765036
0.922139471902505	0.265671641791045		0.564159292035398	0.74		0.919426048565121	0.315958299919808
0.922139471902505	0.265837479270315		0.561946902654867	0.74		0.919426048565121	0.316158781074579
0.922139471902505	0.266003316749585		0.561946902654867	0.740487804878049		0.919426048565121	0.31635926222935
0.922139471902505	0.266169154228856		0.561946902654867	0.740975609756098		0.919426048565121	0.316559743384122
0.922139471902505	0.266334991708126		0.561946902654867	0.741463414634146		0.919426048565121	0.316760224538893
0.922139471902505	0.266500829187396		0.561946902654867	0.741951219512195		0.919426048565121	0.316960705693665
0.922139471902505	0.266666666666667		0.561946902654867	0.742439024390244		0.919426048565121	0.317161186848436
0.922139471902505	0.266832504145937		0.561946902654867	0.742926829268293		0.919426048565121	0.317361668003208
0.922139471902505	0.266998341625207		0.561946902654867	0.743414634146341		0.919426048565121	0.317562149157979
0.922139471902505	0.267164179104478		0.561946902654867	0.74390243902439		0.919426048565121	0.317762630312751
0.921462423832092	0.267164179104478		0.561946902654867	0.744390243902439		0.919426048565121	0.317963111467522
0.920785375761679	0.267164179104478		0.561946902654867	0.744878048780488		0.919426048565121	0.318163592622293
0.920785375761679	0.267330016583748		0.561946902654867	0.745365853658537		0.919426048565121	0.318364073777065
0.920108327691266	0.267330016583748		0.559734513274336	0.745365853658537		0.919426048565121	0.318564554931836
0.920108327691266	0.267495854063018		0.559734513274336	0.745853658536585		0.919426048565121	0.318765036086608
0.919431279620853	0.267495854063018		0.559734513274336	0.746341463414634		0.91832229580574	0.318765036086608
0.919431279620853	0.267661691542289		0.559734513274336	0.746829268292683		0.91832229580574	0.318965517241379
0.919431279620853	0.267827529021559		0.559734513274336	0.747317073170732		0.91832229580574	0.319165998396151
0.919431279620853	0.267993366500829		0.559734513274336	0.74780487804878		0.917218543046358	0.319165998396151
0.919431279620853	0.2681592039801		0.559734513274336	0.748292682926829		0.917218543046358	0.319366479550922
0.91875423155044	0.2681592039801		0.559734513274336	0.748780487804878		0.916114790286976	0.319366479550922
0.91875423155044	0.26832504145937		0.559734513274336	0.749268292682927		0.916114790286976	0.319566960705694
0.91875423155044	0.26849087893864		0.559734513274336	0.749756097560976		0.916114790286976	0.319767441860465
0.91875423155044	0.26865671641791		0.557522123893805	0.749756097560976		0.916114790286976	0.319967923015237
0.91875423155044	0.268822553897181		0.555309734513274	0.749756097560976		0.916114790286976	0.320168404170008
0.91875423155044	0.268988391376451		0.555309734513274	0.750243902439024		0.916114790286976	0.320368885324779
0.91875423155044	0.269154228855721		0.555309734513274	0.750731707317073		0.916114790286976	0.320569366479551
0.91875423155044	0.269320066334992		0.555309734513274	0.751219512195122		0.916114790286976	0.320769847634322
0.91875423155044	0.269485903814262		0.555309734513274	0.751707317073171		0.916114790286976	0.320970328789094
0.91875423155044	0.269651741293532		0.553097345132743	0.751707317073171		0.916114790286976	0.321170809943865
0.918077183480027	0.269651741293532		0.553097345132743	0.75219512195122		0.916114790286976	0.321371291098637
0.918077183480027	0.269817578772803		0.553097345132743	0.752682926829268		0.916114790286976	0.321571772253408
0.918077183480027	0.269983416252073		0.553097345132743	0.753170731707317		0.916114790286976	0.32177225340818
0.918077183480027	0.270149253731343		0.553097345132743	0.753658536585366		0.916114790286976	0.321972734562951
0.918077183480027	0.270315091210614		0.550884955752212	0.753658536585366		0.916114790286976	0.322173215717723
0.918077183480027	0.270480928689884		0.550884955752212	0.754146341463415		0.916114790286976	0.322373696872494
0.918077183480027	0.270646766169154		0.550884955752212	0.754634146341463		0.916114790286976	0.322574178027265
0.917400135409614	0.270646766169154		0.550884955752212	0.755121951219512		0.916114790286976	0.322774659182037
0.917400135409614	0.270812603648425		0.550884955752212	0.755609756097561		0.915011037527594	0.322774659182037
0.917400135409614	0.270978441127695		0.550884955752212	0.75609756097561		0.915011037527594	0.322975140336808
0.917400135409614	0.271144278606965		0.550884955752212	0.756585365853659		0.915011037527594	0.32317562149158
0.917400135409614	0.271310116086236		0.550884955752212	0.757073170731707		0.915011037527594	0.323376102646351
0.917400135409614	0.271475953565506		0.550884955752212	0.757560975609756		0.915011037527594	0.323576583801123
0.917400135409614	0.271641791044776		0.550884955752212	0.758048780487805		0.913907284768212	0.323576583801123
0.917400135409614	0.271807628524046		0.550884955752212	0.758536585365854		0.913907284768212	0.323777064955894
0.917400135409614	0.271973466003317		0.550884955752212	0.759024390243902		0.913907284768212	0.323977546110666
0.916723087339201	0.271973466003317		0.550884955752212	0.759512195121951		0.913907284768212	0.324178027265437
0.916723087339201	0.272139303482587		0.548672566371681	0.759512195121951		0.913907284768212	0.324378508420208
0.916723087339201	0.272305140961857		0.548672566371681	0.76		0.913907284768212	0.32457898957498
0.916723087339201	0.272470978441128		0.548672566371681	0.760487804878049		0.913907284768212	0.324779470729751
0.916723087339201	0.272636815920398		0.548672566371681	0.760975609756098		0.913907284768212	0.324979951884523
0.916723087339201	0.272802653399668		0.548672566371681	0.761463414634146		0.913907284768212	0.325180433039294
0.916723087339201	0.272968490878939		0.548672566371681	0.761951219512195		0.913907284768212	0.325380914194066
0.916723087339201	0.273134328358209		0.548672566371681	0.762439024390244		0.913907284768212	0.325581395348837
0.916046039268788	0.273134328358209		0.54646017699115	0.762439024390244		0.913907284768212	0.325781876503609
0.915368991198375	0.273134328358209		0.54646017699115	0.762926829268293		0.913907284768212	0.32598235765838
0.915368991198375	0.273300165837479		0.54646017699115	0.763414634146341		0.913907284768212	0.326182838813152
0.915368991198375	0.27346600331675		0.54646017699115	0.76390243902439		0.913907284768212	0.326383319967923
0.915368991198375	0.27363184079602		0.544247787610619	0.76390243902439		0.913907284768212	0.326583801122694
0.915368991198375	0.27379767827529		0.544247787610619	0.764390243902439		0.913907284768212	0.326784282277466
0.915368991198375	0.273963515754561		0.542035398230089	0.764390243902439		0.91280353200883	0.326784282277466
0.915368991198375	0.274129353233831		0.539823008849557	0.764390243902439		0.91280353200883	0.326984763432237
0.915368991198375	0.274295190713101		0.539823008849557	0.764878048780488		0.91280353200883	0.327185244587009
0.915368991198375	0.274461028192372		0.539823008849557	0.765365853658537		0.91280353200883	0.32738572574178
0.915368991198375	0.274626865671642		0.539823008849557	0.765853658536585		0.91280353200883	0.327586206896552
0.915368991198375	0.274792703150912		0.539823008849557	0.766341463414634		0.91280353200883	0.327786688051323
0.915368991198375	0.274958540630182		0.539823008849557	0.766829268292683		0.91280353200883	0.327987169206095
0.915368991198375	0.275124378109453		0.539823008849557	0.767317073170732		0.91280353200883	0.328187650360866
0.915368991198375	0.275290215588723		0.539823008849557	0.767804878048781		0.91280353200883	0.328388131515638
0.914691943127962	0.275290215588723		0.539823008849557	0.768292682926829		0.91280353200883	0.328588612670409
0.914691943127962	0.275456053067993		0.539823008849557	0.768780487804878		0.91280353200883	0.32878909382518
0.914691943127962	0.275621890547264		0.539823008849557	0.769268292682927		0.91280353200883	0.328989574979952
0.914691943127962	0.275787728026534		0.539823008849557	0.769756097560976		0.91280353200883	0.329190056134723
0.914691943127962	0.275953565505804		0.539823008849557	0.770243902439024		0.91280353200883	0.329390537289495
0.914691943127962	0.276119402985075		0.539823008849557	0.770731707317073		0.91280353200883	0.329591018444266
0.914691943127962	0.276285240464345		0.539823008849557	0.771219512195122		0.91280353200883	0.329791499599038
0.914691943127962	0.276451077943615		0.539823008849557	0.771707317073171		0.91280353200883	0.329991980753809
0.914691943127962	0.276616915422886		0.539823008849557	0.77219512195122		0.911699779249448	0.329991980753809
0.914691943127962	0.276782752902156		0.539823008849557	0.772682926829268		0.911699779249448	0.330192461908581
0.914691943127962	0.276948590381426		0.539823008849557	0.773170731707317		0.911699779249448	0.330392943063352
0.914691943127962	0.277114427860697		0.539823008849557	0.773658536585366		0.911699779249448	0.330593424218123
0.914691943127962	0.277280265339967		0.539823008849557	0.774146341463415		0.911699779249448	0.330793905372895
0.914691943127962	0.277446102819237		0.539823008849557	0.774634146341463		0.911699779249448	0.330994386527666
0.914691943127962	0.277611940298507		0.539823008849557	0.775121951219512		0.911699779249448	0.331194867682438
0.914691943127962	0.277777777777778		0.539823008849557	0.775609756097561		0.911699779249448	0.331395348837209
0.914691943127962	0.277943615257048		0.539823008849557	0.77609756097561		0.911699779249448	0.331595829991981
0.914691943127962	0.278109452736318		0.539823008849557	0.776585365853659		0.911699779249448	0.331796311146752
0.914014895057549	0.278109452736318		0.539823008849557	0.777073170731707		0.911699779249448	0.331996792301524
0.914014895057549	0.278275290215589		0.539823008849557	0.777560975609756		0.911699779249448	0.332197273456295
0.914014895057549	0.278441127694859		0.539823008849557	0.778048780487805		0.911699779249448	0.332397754611067
0.914014895057549	0.278606965174129		0.539823008849557	0.778536585365854		0.911699779249448	0.332598235765838
0.914014895057549	0.2787728026534		0.539823008849557	0.779024390243902		0.910596026490066	0.332598235765838
0.914014895057549	0.27893864013267		0.539823008849557	0.779512195121951		0.910596026490066	0.332798716920609
0.914014895057549	0.27910447761194		0.539823008849557	0.78		0.910596026490066	0.332999198075381
0.913337846987136	0.27910447761194		0.539823008849557	0.780487804878049		0.910596026490066	0.333199679230152
0.913337846987136	0.279270315091211		0.539823008849557	0.780975609756098		0.910596026490066	0.333400160384924
0.913337846987136	0.279436152570481		0.539823008849557	0.781463414634146		0.910596026490066	0.333600641539695
0.913337846987136	0.279601990049751		0.539823008849557	0.781951219512195		0.910596026490066	0.333801122694467
0.913337846987136	0.279767827529022		0.539823008849557	0.782439024390244		0.910596026490066	0.334001603849238
0.912660798916723	0.279767827529022		0.539823008849557	0.782926829268293		0.910596026490066	0.33420208500401
0.912660798916723	0.279933665008292		0.539823008849557	0.783414634146341		0.910596026490066	0.334402566158781
0.912660798916723	0.280099502487562		0.539823008849557	0.78390243902439		0.910596026490066	0.334603047313553
0.912660798916723	0.280265339966833		0.539823008849557	0.784390243902439		0.910596026490066	0.334803528468324
0.912660798916723	0.280431177446103		0.539823008849557	0.784878048780488		0.910596026490066	0.335004009623095
0.912660798916723	0.280597014925373		0.539823008849557	0.785365853658537		0.910596026490066	0.335204490777867
0.912660798916723	0.280762852404643		0.539823008849557	0.785853658536585		0.910596026490066	0.335404971932638
0.912660798916723	0.280928689883914		0.539823008849557	0.786341463414634		0.910596026490066	0.33560545308741
0.912660798916723	0.281094527363184		0.539823008849557	0.786829268292683		0.910596026490066	0.335805934242181
0.912660798916723	0.281260364842454		0.537610619469027	0.786829268292683		0.910596026490066	0.336006415396953
0.912660798916723	0.281426202321725		0.537610619469027	0.787317073170732		0.910596026490066	0.336206896551724
0.912660798916723	0.281592039800995		0.537610619469027	0.787804878048781		0.910596026490066	0.336407377706496
0.912660798916723	0.281757877280265		0.537610619469027	0.788292682926829		0.910596026490066	0.336607858861267
0.912660798916723	0.281923714759536		0.537610619469027	0.788780487804878		0.910596026490066	0.336808340016038
0.912660798916723	0.282089552238806		0.537610619469027	0.789268292682927		0.910596026490066	0.33700882117081
0.912660798916723	0.282255389718076		0.537610619469027	0.789756097560976		0.910596026490066	0.337209302325581
0.912660798916723	0.282421227197347		0.537610619469027	0.790243902439024		0.910596026490066	0.337409783480353
0.912660798916723	0.282587064676617		0.537610619469027	0.790731707317073		0.910596026490066	0.337610264635124
0.912660798916723	0.282752902155887		0.537610619469027	0.791219512195122		0.910596026490066	0.337810745789896
0.912660798916723	0.282918739635158		0.537610619469027	0.791707317073171		0.910596026490066	0.338011226944667
0.912660798916723	0.283084577114428		0.537610619469027	0.79219512195122		0.909492273730684	0.338011226944667
0.912660798916723	0.283250414593698		0.537610619469027	0.792682926829268		0.909492273730684	0.338211708099439
0.91198375084631	0.283250414593698		0.535398230088496	0.792682926829268		0.909492273730684	0.33841218925421
0.911306702775897	0.283250414593698		0.535398230088496	0.793170731707317		0.908388520971302	0.33841218925421
0.911306702775897	0.283416252072968		0.535398230088496	0.793658536585366		0.907284768211921	0.33841218925421
0.911306702775897	0.283582089552239		0.535398230088496	0.794146341463415		0.907284768211921	0.338612670408982
0.911306702775897	0.283747927031509		0.535398230088496	0.794634146341463		0.907284768211921	0.338813151563753
0.910629654705484	0.283747927031509		0.535398230088496	0.795121951219512		0.907284768211921	0.339013632718524
0.910629654705484	0.283913764510779		0.535398230088496	0.795609756097561		0.907284768211921	0.339214113873296
0.910629654705484	0.28407960199005		0.533185840707965	0.795609756097561		0.907284768211921	0.339414595028067
0.910629654705484	0.28424543946932		0.533185840707965	0.79609756097561		0.907284768211921	0.339615076182839
0.910629654705484	0.28441127694859		0.533185840707965	0.796585365853659		0.907284768211921	0.33981555733761
0.910629654705484	0.284577114427861		0.530973451327434	0.796585365853659		0.907284768211921	0.340016038492382
0.910629654705484	0.284742951907131		0.528761061946903	0.796585365853659		0.907284768211921	0.340216519647153
0.910629654705484	0.284908789386401		0.528761061946903	0.797073170731707		0.907284768211921	0.340417000801925
0.910629654705484	0.285074626865672		0.526548672566372	0.797073170731707		0.907284768211921	0.340617481956696
0.910629654705484	0.285240464344942		0.526548672566372	0.797560975609756		0.907284768211921	0.340817963111468
0.910629654705484	0.285406301824212		0.524336283185841	0.797560975609756		0.907284768211921	0.341018444266239
0.910629654705484	0.285572139303483		0.524336283185841	0.798048780487805		0.907284768211921	0.34121892542101
0.910629654705484	0.285737976782753		0.524336283185841	0.798536585365854		0.907284768211921	0.341419406575782
0.910629654705484	0.285903814262023		0.52212389380531	0.798536585365854		0.907284768211921	0.341619887730553
0.910629654705484	0.286069651741294		0.519911504424779	0.798536585365854		0.907284768211921	0.341820368885325
0.910629654705484	0.286235489220564		0.519911504424779	0.799024390243902		0.907284768211921	0.342020850040096
0.910629654705484	0.286401326699834		0.517699115044248	0.799024390243902		0.907284768211921	0.342221331194868
0.910629654705484	0.286567164179104		0.517699115044248	0.799512195121951		0.907284768211921	0.342421812349639
0.910629654705484	0.286733001658375		0.517699115044248	0.8		0.907284768211921	0.342622293504411
0.910629654705484	0.286898839137645		0.515486725663717	0.8		0.907284768211921	0.342822774659182
0.910629654705484	0.287064676616915		0.513274336283186	0.8		0.907284768211921	0.343023255813953
0.910629654705484	0.287230514096186		0.513274336283186	0.800487804878049		0.907284768211921	0.343223736968725
0.910629654705484	0.287396351575456		0.513274336283186	0.800975609756098		0.907284768211921	0.343424218123496
0.910629654705484	0.287562189054726		0.513274336283186	0.801463414634146		0.907284768211921	0.343624699278268
0.910629654705484	0.287728026533997		0.513274336283186	0.801951219512195		0.907284768211921	0.343825180433039
0.909952606635071	0.287728026533997		0.511061946902655	0.801951219512195		0.907284768211921	0.344025661587811
0.909952606635071	0.287893864013267		0.511061946902655	0.802439024390244		0.907284768211921	0.344226142742582
0.909952606635071	0.288059701492537		0.511061946902655	0.802926829268293		0.907284768211921	0.344426623897354
0.909952606635071	0.288225538971808		0.511061946902655	0.803414634146342		0.907284768211921	0.344627105052125
0.909952606635071	0.288391376451078		0.511061946902655	0.80390243902439		0.907284768211921	0.344827586206897
0.909275558564658	0.288391376451078		0.511061946902655	0.804390243902439		0.907284768211921	0.345028067361668
0.909275558564658	0.288557213930348		0.508849557522124	0.804390243902439		0.907284768211921	0.345228548516439
0.908598510494245	0.288557213930348		0.508849557522124	0.804878048780488		0.907284768211921	0.345429029671211
0.908598510494245	0.288723051409619		0.508849557522124	0.805365853658537		0.907284768211921	0.345629510825982
0.908598510494245	0.288888888888889		0.508849557522124	0.805853658536585		0.907284768211921	0.345829991980754
0.907921462423832	0.288888888888889		0.508849557522124	0.806341463414634		0.907284768211921	0.346030473135525
0.907921462423832	0.289054726368159		0.508849557522124	0.806829268292683		0.907284768211921	0.346230954290297
0.907921462423832	0.28922056384743		0.508849557522124	0.807317073170732		0.907284768211921	0.346431435445068
0.907921462423832	0.2893864013267		0.508849557522124	0.807804878048781		0.907284768211921	0.34663191659984
0.907921462423832	0.28955223880597		0.508849557522124	0.808292682926829		0.907284768211921	0.346832397754611
0.907921462423832	0.28971807628524		0.506637168141593	0.808292682926829		0.907284768211921	0.347032878909383
0.907921462423832	0.289883913764511		0.506637168141593	0.808780487804878		0.907284768211921	0.347233360064154
0.907921462423832	0.290049751243781		0.504424778761062	0.808780487804878		0.907284768211921	0.347433841218925
0.907921462423832	0.290215588723051		0.504424778761062	0.809268292682927		0.907284768211921	0.347634322373697
0.907921462423832	0.290381426202322		0.504424778761062	0.809756097560976		0.907284768211921	0.347834803528468
0.907921462423832	0.290547263681592		0.504424778761062	0.810243902439024		0.907284768211921	0.34803528468324
0.907921462423832	0.290713101160862		0.504424778761062	0.810731707317073		0.907284768211921	0.348235765838011
0.907921462423832	0.290878938640133		0.502212389380531	0.810731707317073		0.907284768211921	0.348436246992783
0.907921462423832	0.291044776119403		0.5	0.810731707317073		0.907284768211921	0.348636728147554
0.907921462423832	0.291210613598673		0.5	0.811219512195122		0.906181015452539	0.348636728147554
0.907244414353419	0.291210613598673		0.5	0.811707317073171		0.906181015452539	0.348837209302326
0.907244414353419	0.291376451077944		0.5	0.81219512195122		0.906181015452539	0.349037690457097
0.907244414353419	0.291542288557214		0.497787610619469	0.81219512195122		0.906181015452539	0.349238171611868
0.907244414353419	0.291708126036484		0.497787610619469	0.812682926829268		0.906181015452539	0.34943865276664
0.907244414353419	0.291873963515755		0.495575221238938	0.812682926829268		0.906181015452539	0.349639133921411
0.907244414353419	0.292039800995025		0.495575221238938	0.813170731707317		0.906181015452539	0.349839615076183
0.907244414353419	0.292205638474295		0.495575221238938	0.813658536585366		0.906181015452539	0.350040096230954
0.906567366283006	0.292205638474295		0.495575221238938	0.814146341463415		0.906181015452539	0.350240577385726
0.905890318212593	0.292205638474295		0.495575221238938	0.814634146341463		0.906181015452539	0.350441058540497
0.905890318212593	0.292371475953565		0.493362831858407	0.814634146341463		0.906181015452539	0.350641539695269
0.905890318212593	0.292537313432836		0.491150442477876	0.814634146341463		0.906181015452539	0.35084202085004
0.905890318212593	0.292703150912106		0.491150442477876	0.815121951219512		0.906181015452539	0.351042502004812
0.905890318212593	0.292868988391376		0.491150442477876	0.815609756097561		0.906181015452539	0.351242983159583
0.905890318212593	0.293034825870647		0.491150442477876	0.81609756097561		0.906181015452539	0.351443464314354
0.905890318212593	0.293200663349917		0.491150442477876	0.816585365853658		0.906181015452539	0.351643945469126
0.905890318212593	0.293366500829187		0.491150442477876	0.817073170731707		0.906181015452539	0.351844426623897
0.905890318212593	0.293532338308458		0.488938053097345	0.817073170731707		0.906181015452539	0.352044907778669
0.905890318212593	0.293698175787728		0.486725663716814	0.817073170731707		0.906181015452539	0.35224538893344
0.905890318212593	0.293864013266998		0.486725663716814	0.817560975609756		0.906181015452539	0.352445870088212
0.905890318212593	0.294029850746269		0.486725663716814	0.818048780487805		0.906181015452539	0.352646351242983
0.90521327014218	0.294029850746269		0.486725663716814	0.818536585365854		0.905077262693157	0.352646351242983
0.90521327014218	0.294195688225539		0.484513274336283	0.818536585365854		0.905077262693157	0.352846832397755
0.904536222071767	0.294195688225539		0.484513274336283	0.819024390243902		0.905077262693157	0.353047313552526
0.904536222071767	0.294361525704809		0.482300884955752	0.819024390243902		0.905077262693157	0.353247794707298
0.904536222071767	0.29452736318408		0.482300884955752	0.819512195121951		0.905077262693157	0.353448275862069
0.904536222071767	0.29469320066335		0.482300884955752	0.82		0.905077262693157	0.35364875701684
0.904536222071767	0.29485903814262		0.482300884955752	0.820487804878049		0.905077262693157	0.353849238171612
0.904536222071767	0.295024875621891		0.480088495575221	0.820487804878049		0.905077262693157	0.354049719326383
0.904536222071767	0.295190713101161		0.480088495575221	0.820975609756098		0.905077262693157	0.354250200481155
0.904536222071767	0.295356550580431		0.480088495575221	0.821463414634146		0.905077262693157	0.354450681635926
0.904536222071767	0.295522388059701		0.47787610619469	0.821463414634146		0.905077262693157	0.354651162790698
0.904536222071767	0.295688225538972		0.47787610619469	0.821951219512195		0.903973509933775	0.354651162790698
0.904536222071767	0.295854063018242		0.475663716814159	0.821951219512195		0.903973509933775	0.354851643945469
0.904536222071767	0.296019900497512		0.473451327433628	0.821951219512195		0.903973509933775	0.355052125100241
0.904536222071767	0.296185737976783		0.471238938053097	0.821951219512195		0.903973509933775	0.355252606255012
0.904536222071767	0.296351575456053		0.471238938053097	0.822439024390244		0.903973509933775	0.355453087409783
0.903859174001354	0.296351575456053		0.471238938053097	0.822926829268293		0.903973509933775	0.355653568564555
0.903859174001354	0.296517412935323		0.471238938053097	0.823414634146341		0.903973509933775	0.355854049719326
0.903859174001354	0.296683250414594		0.469026548672566	0.823414634146341		0.903973509933775	0.356054530874098
0.903182125930941	0.296683250414594		0.469026548672566	0.82390243902439		0.903973509933775	0.356255012028869
0.902505077860528	0.296683250414594		0.466814159292035	0.82390243902439		0.903973509933775	0.356455493183641
0.902505077860528	0.296849087893864		0.464601769911504	0.82390243902439		0.903973509933775	0.356655974338412
0.902505077860528	0.297014925373134		0.464601769911504	0.824390243902439		0.903973509933775	0.356856455493184
0.902505077860528	0.297180762852405		0.464601769911504	0.824878048780488		0.903973509933775	0.357056936647955
0.902505077860528	0.297346600331675		0.464601769911504	0.825365853658537		0.903973509933775	0.357257417802727
0.901828029790115	0.297346600331675		0.464601769911504	0.825853658536585		0.903973509933775	0.357457898957498
0.901828029790115	0.297512437810945		0.464601769911504	0.826341463414634		0.903973509933775	0.357658380112269
0.901828029790115	0.297678275290216		0.462389380530973	0.826341463414634		0.903973509933775	0.357858861267041
0.901828029790115	0.297844112769486		0.462389380530973	0.826829268292683		0.903973509933775	0.358059342421812
0.901150981719702	0.297844112769486		0.460176991150442	0.826829268292683		0.903973509933775	0.358259823576584
0.901150981719702	0.298009950248756		0.460176991150442	0.827317073170732		0.903973509933775	0.358460304731355
0.901150981719702	0.298175787728027		0.460176991150442	0.82780487804878		0.903973509933775	0.358660785886127
0.901150981719702	0.298341625207297		0.457964601769911	0.82780487804878		0.902869757174393	0.358660785886127
0.901150981719702	0.298507462686567		0.457964601769911	0.828292682926829		0.902869757174393	0.358861267040898
0.901150981719702	0.298673300165837		0.455752212389381	0.828292682926829		0.902869757174393	0.35906174819567
0.901150981719702	0.298839137645108		0.455752212389381	0.828780487804878		0.902869757174393	0.359262229350441
0.901150981719702	0.299004975124378		0.45353982300885	0.828780487804878		0.902869757174393	0.359462710505213
0.901150981719702	0.299170812603648		0.451327433628319	0.828780487804878		0.902869757174393	0.359663191659984
0.901150981719702	0.299336650082919		0.451327433628319	0.829268292682927		0.902869757174393	0.359863672814755
0.901150981719702	0.299502487562189		0.451327433628319	0.829756097560976		0.902869757174393	0.360064153969527
0.901150981719702	0.299668325041459		0.449115044247788	0.829756097560976		0.902869757174393	0.360264635124298
0.901150981719702	0.29983416252073		0.449115044247788	0.830243902439024		0.902869757174393	0.36046511627907
0.901150981719702	0.3		0.449115044247788	0.830731707317073		0.902869757174393	0.360665597433841
0.901150981719702	0.30016583747927		0.446902654867257	0.830731707317073		0.902869757174393	0.360866078588613
0.901150981719702	0.300331674958541		0.446902654867257	0.831219512195122		0.902869757174393	0.361066559743384
0.901150981719702	0.300497512437811		0.446902654867257	0.831707317073171		0.902869757174393	0.361267040898156
0.900473933649289	0.300497512437811		0.446902654867257	0.832195121951219		0.902869757174393	0.361467522052927
0.900473933649289	0.300663349917081		0.446902654867257	0.832682926829268		0.902869757174393	0.361668003207698
0.900473933649289	0.300829187396352		0.446902654867257	0.833170731707317		0.902869757174393	0.36186848436247
0.900473933649289	0.300995024875622		0.446902654867257	0.833658536585366		0.902869757174393	0.362068965517241
0.900473933649289	0.301160862354892		0.446902654867257	0.834146341463415		0.902869757174393	0.362269446672013
0.900473933649289	0.301326699834163		0.446902654867257	0.834634146341463		0.902869757174393	0.362469927826784
0.900473933649289	0.301492537313433		0.444690265486726	0.834634146341463		0.902869757174393	0.362670408981556
0.899796885578876	0.301492537313433		0.442477876106195	0.834634146341463		0.902869757174393	0.362870890136327
0.899796885578876	0.301658374792703		0.442477876106195	0.835121951219512		0.902869757174393	0.363071371291099
0.899796885578876	0.301824212271973		0.442477876106195	0.835609756097561		0.902869757174393	0.36327185244587
0.899796885578876	0.301990049751244		0.442477876106195	0.83609756097561		0.902869757174393	0.363472333600642
0.899796885578876	0.302155887230514		0.440265486725664	0.83609756097561		0.902869757174393	0.363672814755413
0.899796885578876	0.302321724709784		0.440265486725664	0.836585365853659		0.902869757174393	0.363873295910184
0.899796885578876	0.302487562189055		0.440265486725664	0.837073170731707		0.902869757174393	0.364073777064956
0.899796885578876	0.302653399668325		0.438053097345133	0.837073170731707		0.902869757174393	0.364274258219727
0.899119837508463	0.302653399668325		0.438053097345133	0.837560975609756		0.902869757174393	0.364474739374499
0.899119837508463	0.302819237147595		0.438053097345133	0.838048780487805		0.902869757174393	0.36467522052927
0.899119837508463	0.302985074626866		0.435840707964602	0.838048780487805		0.902869757174393	0.364875701684042
0.899119837508463	0.303150912106136		0.435840707964602	0.838536585365854		0.902869757174393	0.365076182838813
0.899119837508463	0.303316749585406		0.435840707964602	0.839024390243902		0.902869757174393	0.365276663993585
0.899119837508463	0.303482587064677		0.435840707964602	0.839512195121951		0.902869757174393	0.365477145148356
0.899119837508463	0.303648424543947		0.435840707964602	0.84		0.902869757174393	0.365677626303128
0.899119837508463	0.303814262023217		0.435840707964602	0.840487804878049		0.902869757174393	0.365878107457899
0.89844278943805	0.303814262023217		0.435840707964602	0.840975609756098		0.902869757174393	0.36607858861267
0.89844278943805	0.303980099502488		0.433628318584071	0.840975609756098		0.902869757174393	0.366279069767442
0.89844278943805	0.304145936981758		0.433628318584071	0.841463414634146		0.902869757174393	0.366479550922213
0.89844278943805	0.304311774461028		0.433628318584071	0.841951219512195		0.902869757174393	0.366680032076985
0.89844278943805	0.304477611940298		0.433628318584071	0.842439024390244		0.902869757174393	0.366880513231756
0.89844278943805	0.304643449419569		0.43141592920354	0.842439024390244		0.901766004415011	0.366880513231756
0.89844278943805	0.304809286898839		0.43141592920354	0.842926829268293		0.901766004415011	0.367080994386528
0.89844278943805	0.304975124378109		0.43141592920354	0.843414634146341		0.901766004415011	0.367281475541299
0.89844278943805	0.30514096185738		0.43141592920354	0.84390243902439		0.901766004415011	0.367481956696071
0.89844278943805	0.30530679933665		0.43141592920354	0.844390243902439		0.901766004415011	0.367682437850842
0.89844278943805	0.30547263681592		0.43141592920354	0.844878048780488		0.901766004415011	0.367882919005613
0.89844278943805	0.305638474295191		0.429203539823009	0.844878048780488		0.901766004415011	0.368083400160385
0.897765741367637	0.305638474295191		0.429203539823009	0.845365853658537		0.901766004415011	0.368283881315156
0.897765741367637	0.305804311774461		0.426991150442478	0.845365853658537		0.901766004415011	0.368484362469928
0.897765741367637	0.305970149253731		0.426991150442478	0.845853658536585		0.901766004415011	0.368684843624699
0.897765741367637	0.306135986733002		0.426991150442478	0.846341463414634		0.901766004415011	0.368885324779471
0.897765741367637	0.306301824212272		0.426991150442478	0.846829268292683		0.900662251655629	0.368885324779471
0.897765741367637	0.306467661691542		0.424778761061947	0.846829268292683		0.900662251655629	0.369085805934242
0.897765741367637	0.306633499170813		0.422566371681416	0.846829268292683		0.900662251655629	0.369286287089014
0.897765741367637	0.306799336650083		0.422566371681416	0.847317073170732		0.900662251655629	0.369486768243785
0.897765741367637	0.306965174129353		0.420353982300885	0.847317073170732		0.900662251655629	0.369687249398557
0.897088693297224	0.306965174129353		0.420353982300885	0.84780487804878		0.900662251655629	0.369887730553328
0.897088693297224	0.307131011608624		0.418141592920354	0.84780487804878		0.900662251655629	0.370088211708099
0.897088693297224	0.307296849087894		0.418141592920354	0.848292682926829		0.900662251655629	0.370288692862871
0.897088693297224	0.307462686567164		0.418141592920354	0.848780487804878		0.900662251655629	0.370489174017642
0.897088693297224	0.307628524046434		0.415929203539823	0.848780487804878		0.900662251655629	0.370689655172414
0.897088693297224	0.307794361525705		0.415929203539823	0.849268292682927		0.900662251655629	0.370890136327185
0.897088693297224	0.307960199004975		0.415929203539823	0.849756097560976		0.900662251655629	0.371090617481957
0.897088693297224	0.308126036484245		0.415929203539823	0.850243902439024		0.900662251655629	0.371291098636728
0.897088693297224	0.308291873963516		0.413716814159292	0.850243902439024		0.900662251655629	0.3714915797915
0.897088693297224	0.308457711442786		0.411504424778761	0.850243902439024		0.900662251655629	0.371692060946271
0.897088693297224	0.308623548922056		0.411504424778761	0.850731707317073		0.900662251655629	0.371892542101043
0.897088693297224	0.308789386401327		0.40929203539823	0.850731707317073		0.900662251655629	0.372093023255814
0.897088693297224	0.308955223880597		0.407079646017699	0.850731707317073		0.900662251655629	0.372293504410585
0.897088693297224	0.309121061359867		0.407079646017699	0.851219512195122		0.900662251655629	0.372493985565357
0.897088693297224	0.309286898839138		0.407079646017699	0.851707317073171		0.900662251655629	0.372694466720128
0.897088693297224	0.309452736318408		0.407079646017699	0.852195121951219		0.900662251655629	0.3728949478749
0.897088693297224	0.309618573797678		0.407079646017699	0.852682926829268		0.900662251655629	0.373095429029671
0.897088693297224	0.309784411276949		0.407079646017699	0.853170731707317		0.900662251655629	0.373295910184443
0.897088693297224	0.309950248756219		0.407079646017699	0.853658536585366		0.900662251655629	0.373496391339214
0.897088693297224	0.310116086235489		0.404867256637168	0.853658536585366		0.899558498896247	0.373496391339214
0.897088693297224	0.31028192371476		0.404867256637168	0.854146341463415		0.899558498896247	0.373696872493986
0.897088693297224	0.31044776119403		0.402654867256637	0.854146341463415		0.899558498896247	0.373897353648757
0.897088693297224	0.3106135986733		0.402654867256637	0.854634146341463		0.898454746136865	0.373897353648757
0.897088693297224	0.31077943615257		0.402654867256637	0.855121951219512		0.898454746136865	0.374097834803528
0.897088693297224	0.310945273631841		0.402654867256637	0.855609756097561		0.898454746136865	0.3742983159583
0.896411645226811	0.310945273631841		0.402654867256637	0.85609756097561		0.898454746136865	0.374498797113071
0.896411645226811	0.311111111111111		0.402654867256637	0.856585365853659		0.898454746136865	0.374699278267843
0.896411645226811	0.311276948590381		0.402654867256637	0.857073170731707		0.898454746136865	0.374899759422614
0.896411645226811	0.311442786069652		0.402654867256637	0.857560975609756		0.898454746136865	0.375100240577386
0.895734597156398	0.311442786069652		0.402654867256637	0.858048780487805		0.898454746136865	0.375300721732157
0.893703452945159	0.316583747927032		0.402654867256637	0.858536585365854		0.898454746136865	0.375501202886929
0.893703452945159	0.316749585406302		0.400442477876106	0.858536585365854		0.898454746136865	0.3757016840417
0.893703452945159	0.316915422885572		0.400442477876106	0.859024390243902		0.898454746136865	0.375902165196472
0.893026404874746	0.316915422885572		0.398230088495575	0.859024390243902		0.898454746136865	0.376102646351243
0.892349356804333	0.316915422885572		0.398230088495575	0.859512195121951		0.898454746136865	0.376303127506014
0.892349356804333	0.317081260364842		0.398230088495575	0.86		0.898454746136865	0.376503608660786
0.892349356804333	0.317247097844113		0.396017699115044	0.86		0.898454746136865	0.376704089815557
0.892349356804333	0.317412935323383		0.396017699115044	0.860487804878049		0.898454746136865	0.376904570970329
0.892349356804333	0.317578772802653		0.396017699115044	0.860975609756098		0.898454746136865	0.3771050521251
0.892349356804333	0.317744610281924		0.396017699115044	0.861463414634146		0.898454746136865	0.377305533279872
0.892349356804333	0.317910447761194		0.393805309734513	0.861463414634146		0.898454746136865	0.377506014434643
0.892349356804333	0.318076285240464		0.391592920353982	0.861463414634146		0.898454746136865	0.377706495589415
0.892349356804333	0.318242122719735		0.389380530973451	0.861463414634146		0.898454746136865	0.377906976744186
0.892349356804333	0.318407960199005		0.389380530973451	0.861951219512195		0.898454746136865	0.378107457898957
0.892349356804333	0.318573797678275		0.389380530973451	0.862439024390244		0.898454746136865	0.378307939053729
0.892349356804333	0.318739635157546		0.389380530973451	0.862926829268293		0.897350993377483	0.378307939053729
0.892349356804333	0.318905472636816		0.38716814159292	0.862926829268293		0.897350993377483	0.3785084202085
0.892349356804333	0.319071310116086		0.38716814159292	0.863414634146341		0.897350993377483	0.378708901363272
0.892349356804333	0.319237147595357		0.384955752212389	0.863414634146341		0.897350993377483	0.378909382518043
0.892349356804333	0.319402985074627		0.382743362831858	0.863414634146341		0.897350993377483	0.379109863672815
0.892349356804333	0.319568822553897		0.382743362831858	0.86390243902439		0.897350993377483	0.379310344827586
0.892349356804333	0.319734660033167		0.382743362831858	0.864390243902439		0.897350993377483	0.379510825982358
0.892349356804333	0.319900497512438		0.380530973451327	0.864390243902439		0.897350993377483	0.379711307137129
0.892349356804333	0.320066334991708		0.380530973451327	0.864878048780488		0.897350993377483	0.379911788291901
0.892349356804333	0.320232172470978		0.380530973451327	0.865365853658537		0.897350993377483	0.380112269446672
0.892349356804333	0.320398009950249		0.378318584070796	0.865365853658537		0.896247240618102	0.380112269446672
0.892349356804333	0.320563847429519		0.376106194690265	0.865365853658537		0.896247240618102	0.380312750601443
0.892349356804333	0.320729684908789		0.376106194690265	0.865853658536585		0.896247240618102	0.380513231756215
0.892349356804333	0.32089552238806		0.376106194690265	0.866341463414634		0.896247240618102	0.380713712910986
0.892349356804333	0.32106135986733		0.376106194690265	0.866829268292683		0.896247240618102	0.380914194065758
0.892349356804333	0.3212271973466		0.376106194690265	0.867317073170732		0.896247240618102	0.381114675220529
0.89167230873392	0.3212271973466		0.376106194690265	0.86780487804878		0.896247240618102	0.381315156375301
0.89167230873392	0.321393034825871		0.373893805309735	0.86780487804878		0.89514348785872	0.381315156375301
[truncated: 5,287 more rows]
