# Supplementary material for: Development and validation of COEWS (COVID-19 Early Warning Score) for hospitalized COVID-19 with laboratory features: A multicontinental retrospective study
Source: eLife. 2023 Aug 24;12:e85618. doi: 10.7554/eLife.85618 (PMC10479961; doi:10.7554/eLife.85618)
Supplement: Supplementary file 2. [file elife-85618-supp2.xlsx]

## Sheet: Calibration
Training					Internal test					External validation
Time	Lower	Value	Upper		Time	Lower	Value	Upper		Time	Lower	Value	Upper
5	4.09929288274045	5.32751091703057	6.79112628480221		5	4.70926067269329	7.06806282722513	10.1172720639205		5	11.3781148747954	12.2558406740712	13.1759885329689
15	12.6883768425488	13.7509549274255	14.8677788895841		15	10.9259120903779	12.681436210848	14.6063851162446		15	36.4674823654176	41.7647058823529	47.2066532280207
25	25.8438239775554	28.2163742690059	30.6828602078148		25	22.0811624189864	26.0303687635575	30.2902172525237		25	30.4931302986666	38.6861313868613	47.379412150497
35	36.0775972455451	40.4471544715447	44.9322131638747		35	27.4116104518754	34.5029239766082	42.1419940285153		35	21.8410840647985	30.2752293577982	39.8133516963804
45	37.9644790543352	43.8848920863309	49.9370608106303		45	19.9929397966894	29.6296296296296	40.8088251454394		45	30.3907113515674	45.4545454545455	61.1527877527085
55	42.405195274023	52.3809523809524	62.2189706025707		55	32.4180780965608	48.7179487179487	65.2197790642659		55	7.78715462910436	26.6666666666667	55.1003241036971
65	41.350521052327	52.2727272727273	63.0376495398545		65	27.7968009669946	48	68.6942955542968		65	7.48546314196918	33.3333333333333	70.070494379146
75	43.2820890720037	59.5238095238095	74.3709074516342		75	41.3379363548641	68.75	88.9830045282883		75	5.27449505263169	40	85.3367200365327
85	47.1795113625412	64.1025641025641	78.79628144392		85	51.7503485082663	88.8888888888889	99.7190863253401		85	28.3582063881911	80	99.4949236620532
95	56.2969273763185	78.2608695652174	92.5396592351196		95	29.929505620854	66.6666666666667	92.5145368580308		95	24.4863216366552	62.5	91.4766585862746
